# Supplementary material for: Palladium-catalyzed difluoroalkylative carbonylation of styrenes toward difluoropentanedioates
Source: Royal Society of Chemistry journal article supplement (doi:10.1039/d2sc02665a), 2022-01-01

## Supporting Information

### Palladium-Catalyzed Difluoroalkylative Carbonylation of Styrenes Toward Difluoropentanedioates

Zhi-Peng Bao,<sup>[a,b]</sup> Youcan Zhang,<sup>[a]</sup> Xiao-Feng Wu<sup>\*[a,b]</sup>

<sup>a</sup> Dalian National Laboratory for Clean Energy, Dalian Institute of Chemical Physics, Chinese Academy of Sciences, 116023 Dalian, Liaoning, China, E-mail: xwu2020@dicp.ac.cn

<sup>b</sup> Leibniz-Institut für Katalyse e.V., Albert-Einstein-Straße 29a, 18059 Rostock, Germany, E-mail: Xiao-Feng.Wu@catalysis.de

### Table of Contents

|                                                                                           |    |
|-------------------------------------------------------------------------------------------|----|
| 1. General Information.....                                                               | 1  |
| 2. Optimization of Reaction Conditions.....                                               | 1  |
| 3. Preparation of 1p, 1q, 6, 1b.....                                                      | 5  |
| 3.1 Preparation of 1p, 1q. ....                                                           | 5  |
| 3.2 Preparation of 1b.....                                                                | 5  |
| 3.3 Preparation of 6. ....                                                                | 6  |
| 4. General Procedure.....                                                                 | 6  |
| 5. Scale-up reaction and transformation of the product 3aa. ....                          | 7  |
| 6. Mechanistic Studies. ....                                                              | 8  |
| 7. Characterization of substrates and Products.....                                       | 10 |
| 7.1 substrates.....                                                                       | 10 |
| 7.2 Products ....                                                                         | 10 |
| 8. References.....                                                                        | 22 |
| 9. Copy of <sup>1</sup> H and <sup>13</sup> C NMR Spectra of Substrates and Products..... | 23 |
| 9.1 Substrates.....                                                                       | 23 |
| 9.2 Products. ....                                                                        | 26 |

## 1. General Information

Unless otherwise noted, all reactions were carried out under a carbon monoxide or nitrogen atmosphere. All reagents were from commercial sources, all solvents are extra dry solvents and used as received without further purification. Column chromatography was performed on silica gel (200-300 meshes) using petroleum ether (b.p. 60-90 °C) and ethyl acetate as the eluents.  $^1\text{H}$  and  $^{13}\text{C}$  NMR spectra were taken on Bruker AVANCE III 400 MHz or 700 MHz spectrometers and spectral data were reported in ppm relative to tetramethylsilane (TMS) as the internal standard and  $\text{CDCl}_3$  or  $\text{DMSO-D}_6$  as solvent. All coupling constants (J) are reported in Hz with the following abbreviations: s = singlet, d = doublet, dd = double doublet, t = triplet, dt = double triplet, q = quartet, m = multiplet, br = broad. Gas chromatography (GC) analyses were performed on an Agilent HP-7890A instrument with a FID detector and HP-5 capillary column (polydimethylsiloxane with 5% phenyl groups, 30 m, 0.32 mm i.d. 0.25  $\mu\text{m}$  film thickness) using argon as carrier gas. Gas chromatography mass spectrometer (GC-MS) analyses were performed on a Shimadzu QP2020 NX instrument. High resolution mass spectra (HRMS) were recorded on Agilent 8890-7250 and Agilent Q-TOF 6540. Because of the high toxicity of carbon monoxide, all of the reactions should be performed in an autoclave. The laboratory should well-equipped with a CO detector and alarm system.

## 2. Optimization of Reaction Conditions

*Table S1.* Optimization type of base.

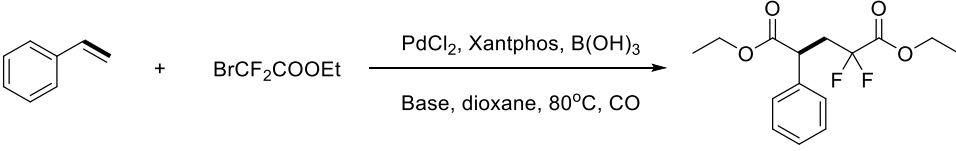

The reaction scheme shows styrene (1a) reacting with ethyl bromodifluoroacetate (2a) in the presence of  $\text{PdCl}_2$ , Xantphos,  $\text{B(OH)}_3$ , a base, dioxane, at  $80^\circ\text{C}$  under CO pressure to yield ethyl 2-(2-(difluoro(methyl)phosphoryl)ethyl)benzoate (3aa).

| Entry | Base                     | 3aa (%) <sup>b</sup> |
|-------|--------------------------|----------------------|
| 1     | $\text{Na}_3\text{PO}_4$ | 7                    |
| 2     | $\text{Na}_2\text{CO}_3$ | 19                   |
| 3     | $\text{NaO}^t\text{Bu}$  | N.D.                 |
| 4     | DiPEA                    | 57                   |

Reaction conditions: **1a** (0.3 mmol), **2a** (0.9 mmol),  $\text{PdCl}_2$  (10 mol%), Xantphos (10 mol%),  $\text{B(OH)}_3$  (0.2 mmol), Base (1.2 mmol), dioxane (1.5 mL), CO (10 bar),  $80^\circ\text{C}$ , 18 h, <sup>b</sup>GC yield.

**Table S2.** Optimization amount of base.

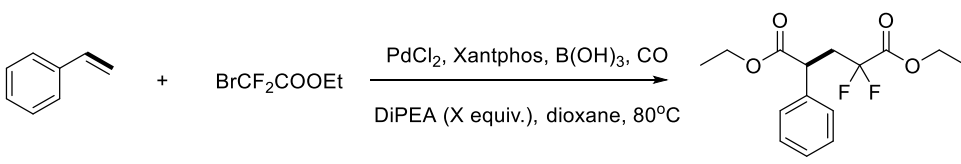

**1a** + **2a**  $\xrightarrow[\text{DiPEA (X equiv.), dioxane, 80}^\circ\text{C}]{\text{PdCl}_2, \text{Xantphos, B(OH)}_3, \text{CO}}$  **3aa**

| Entry | DiPEA (X mmol) | <b>3aa</b> (%) <sup>b</sup> |
|-------|----------------|-----------------------------|
| 1     | 0.9 mmol       | 39                          |
| 2     | 1.2 mmol       | 57                          |
| 3     | 1.5 mmol       | 50                          |

Reaction conditions: **1a** (0.3 mmol), **2a** (0.9 mmol), PdCl<sub>2</sub> (10 mol%), Xantphos (10 mol%), B(OH)<sub>3</sub> (0.2 mmol), DiPEA (X mmol), dioxane (1.5 mL), CO (10 bar), 80 °C, 18 h, <sup>b</sup>GC yield.

**Table S3.** Optimization of pallidum source.

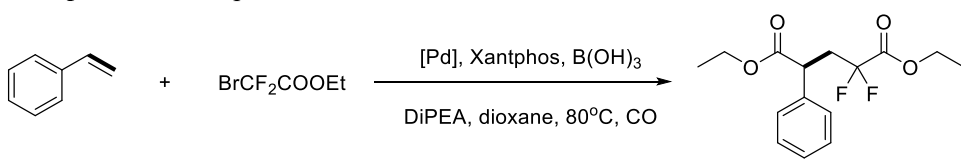

**1a** + **2a**  $\xrightarrow[\text{DiPEA, dioxane, 80}^\circ\text{C, CO}]{[\text{Pd}], \text{Xantphos, B(OH)}_3}$  **3aa**

| Entry | [Pd]                                               | <b>3aa</b> (%) <sup>b</sup> |
|-------|----------------------------------------------------|-----------------------------|
| 1     | Pd(OAc) <sub>2</sub>                               | 50                          |
| 2     | Pd(PPh <sub>3</sub> ) <sub>4</sub>                 | 46                          |
| 3     | Pd(PPh <sub>3</sub> ) <sub>2</sub> Cl <sub>2</sub> | 47                          |
| 4     | Pd(TFA) <sub>2</sub>                               | 46                          |
| 5     | [PdCl(allyl)] <sub>2</sub>                         | 32                          |
| 6     | Pd <sub>2</sub> (dba) <sub>3</sub>                 | 44                          |
| 7     | PdCl <sub>2</sub>                                  | 57                          |

Reaction conditions: **1a** (0.3 mmol), **2a** (0.9 mmol), [Pd] (10 mol%), Xantphos (10 mol%), B(OH)<sub>3</sub> (0.2 mmol), DiPEA (1.2 mmol), dioxane (1.5 mL), CO (10 bar), 80 °C, 18 h, <sup>b</sup>GC yield.

**Table S4.** Optimization amount of B(OH)<sub>3</sub>.

**1a** + **2a**  $\xrightarrow[\text{DiPEA, dioxane, 80}^\circ\text{C, CO}]{\text{PdCl}_2, \text{Xantphos, B(OH)}_3 \text{ ( X equiv.)}}$  **3aa**

| Entry | B(OH) <sub>3</sub> | <b>3aa</b> (%) <sup>b</sup> |
|-------|--------------------|-----------------------------|
| 1     | 0                  | 17                          |
| 2     | 0.1 mmol           | 22                          |
| 3     | 0.3 mmol           | 57                          |
| 4     | 0.4 mmol           | 60                          |
| 5     | 0.5 mmol           | 53                          |

Reaction conditions: **1a** (0.3 mmol), **2a** (0.9 mmol), PdCl<sub>2</sub> (10 mol%), Xantphos (10 mol%), B(OH)<sub>3</sub> (X mmol), DiPEA (1.2 mmol), dioxane (1.5 mL), CO (10 bar), 80 °C, 18 h, <sup>b</sup>GC yield.

**Table S5.** Optimization type of solvent.

**1a** + **2a**  $\xrightarrow[\text{DiPEA, Solvent, 80}^\circ\text{C, CO}]{\text{PdCl}_2, \text{Xantphos, B(OH)}_3}$  **3aa**

| Entry | Solvent | <b>3aa</b> (%) <sup>b</sup> |
|-------|---------|-----------------------------|
| 1     | dioxane | 60                          |
| 2     | DCE     | 45                          |
| 3     | DMF     | 47                          |
| 4     | DMSO    | 49                          |
| 5     | MeCN    | 66                          |
| 6     | Toluene | 46                          |
| 7     | THF     | 42                          |

Reaction conditions: **1a** (0.3 mmol), **2a** (0.9 mmol), PdCl<sub>2</sub> (10 mol%), Xantphos (10 mol%), B(OH)<sub>3</sub> (0.4 mmol), DiPEA (1.2 mmol), Solvent (1.5 mL), CO (10 bar), 80 °C, 18 h, <sup>b</sup>GC yield.

**Table S5.** Optimization type of Ligand.

| 1a    | 2a               | 3aa                  |
|-------|------------------|----------------------|
| Entry | Ligand           | 3aa (%) <sup>b</sup> |
| 1     | PPh <sub>3</sub> | 50                   |
| 2     | DPEphos          | 18                   |
| 3     | Nixantphos       | 46                   |
| 4     | DPPP             | trace                |
| 5     | DPPF             | trace                |
| 6     | Xantphos         | 66                   |

Reaction conditions: **1a** (0.3 mmol), **2a** (0.9 mmol), PdCl<sub>2</sub> (10 mol%), Monodentate ligand (20 mol%) or Bidentate ligand (10 mol%), B(OH)<sub>3</sub> (1.3 mmol), DiPEA (1.2 mmol), dioxane (1.5 mL), CO (10 bar), 80 °C, 18 h, <sup>b</sup>GC yield.

**Table S6.** Optimization of pressure of CO.

| 1a    | 2a         | 3aa                  |
|-------|------------|----------------------|
| Entry | CO (X bar) | 3aa (%) <sup>b</sup> |
| 1     | 1          | 26                   |
| 2     | 5          | 67                   |
| 3     | 10         | 66                   |

Reaction conditions: **1a** (0.3 mmol), **2a** (0.9 mmol), PdCl<sub>2</sub> (10 mol%), Xantphos (10 mol%), B(OH)<sub>3</sub> (0.4 mmol), DiPEA (1.2 mmol), MeCN (1.5 mL), CO (X bar), 80 °C, 18 h, <sup>b</sup>GC yield.

**Table S7.** Optimization of additive.

| Entry | Additive | 3aa (%) <sup>b</sup> |
|-------|----------|----------------------|
| 1     | NaI      | 67                   |
| 2     | KI       | 60                   |
| 3     | NaF      | 67                   |
| 4     | CsF      | 81 (78%)             |

Reaction conditions: **1a** (0.3 mmol), **2a** (0.9 mmol), PdCl<sub>2</sub> (10 mol%), Xantphos (10 mol%), B(OH)<sub>3</sub> (0.4 mmol), DiPEA (1.2 mmol), Additive (1 equiv.), MeCN (1.5 mL), CO (5 bar), 80 °C, 18 h, <sup>b</sup>GC yield.

### 3. Preparation of 1p, 1q, 6, 1b.

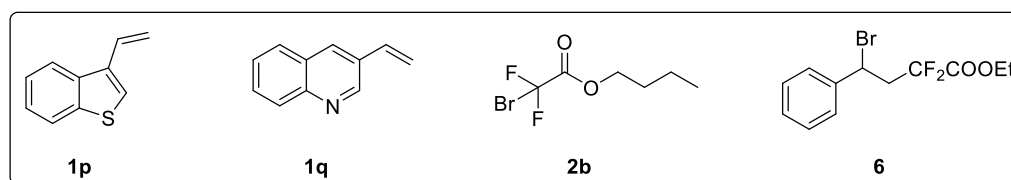

**Note:** Alkenes **1a-o**, **1r-1t** are commercially available.

#### 3.1 Preparation of 1p, 1q.<sup>1</sup>

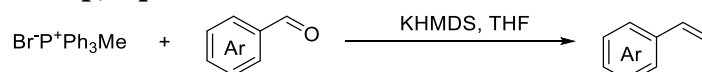

To a suspension of methyltriphenylphosphonium bromide (5.5 mmol) in THF was slowly added potassium bis(trimethylsilyl)amide while maintaining the internal temperature at <5 °C. Aryl aldehyde (5 mmol) was then added in portions. The progress was monitored by TLC. When the reaction was complete, it was quenched with saturated NH<sub>4</sub>Cl (10 mL) and water (10 mL). The organic layer was washed with saturated NaCl (10 mL) and concentrated. The desired products **1p** and **1q** were isolated by silica gel chromatography as colorless oils.

#### 3.2 Preparation of 2b.<sup>2</sup>

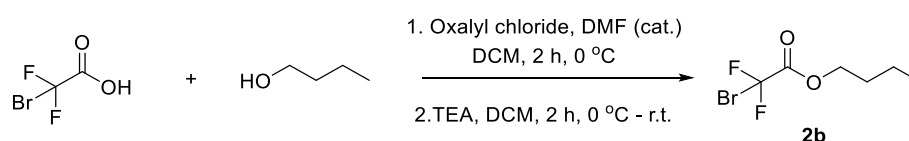

$\alpha$ -Bromo- $\alpha$ ,  $\alpha$ -difluoroacetic acid (1 equiv.) was dissolved in dry DCM in a dry round bottom flask under an atmosphere of nitrogen. Oxalyl chloride (1.1 equiv) was then added followed by two drops of DMF. The solution was then stirred at room temperature for 2 hours or until no more gas evolved. The

*n*-butanol (2 equiv.) and triethylamine (1.1 equiv.) were then added dropwise as a solution in DCM at 0 °C over 20 min. The cooling was removed and stirring was continued for 2 hours. The crude reaction was then diluted with water and extracted three times with DCM. The combined organic phases were washed with saturated bicarbonate and dried over MgSO<sub>4</sub>, filtered and concentrated in vacuo. The resulting residue was then filtered through a short plug of silica (eluent: pentane) and the fractions containing product were concentrated to afford **2b** as a colorless oil.

### 3.3 Preparation of **6**.<sup>3</sup>

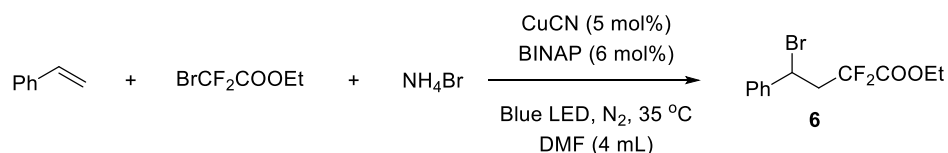

Into a 15 mL Schlenk tube were added CuCN (1.8 mg, 5 mol %), BINAP (14.9 mg, 6 mol %), NH<sub>4</sub>Br (78.3 mg, 0.8 mmol,) and DMF (4 mL) under a N<sub>2</sub> atmosphere. Then the alkene Styrene (41.6 mg, 0.4 mmol) and BrCF<sub>2</sub>COOEt (203.0 mg, 1.0 mmol) were added. The resulting mixture was stirred at 35 °C and irradiated with blue LEDs for 12 h under a N<sub>2</sub> atmosphere. When the reaction was completed, the crude reaction mixture was diluted with EA (20 mL). The solution was washed with water (3×20 mL) and brine (20 mL), and then dried over anhydrous Na<sub>2</sub>SO<sub>4</sub> and evaporated under reduced pressure. The residue was subjected to flash column chromatography (1%→2% ethyl acetate/petroleum ether) to give the final product **6** as a colorless oil.

### 4. General Procedure

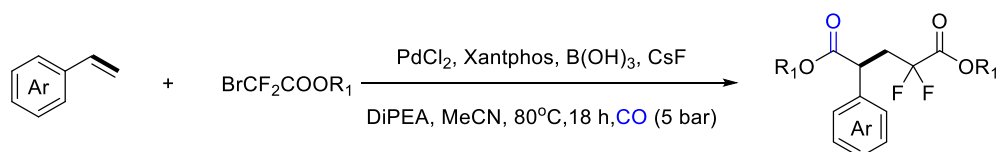

A 4 mL screw-cap vial was charged with PdCl<sub>2</sub> (10 mol%, 5.3 mg), Xantphos (10 mol%, 17.4 mg), B(OH)<sub>3</sub> (0.4 mmol, 24.7 mg), CsF (0.3 mmol, 45.6 mg) and an oven-dried stirring bar. The vial was closed with a Teflon septum and cap and connected to the atmosphere via a needle. Then aryl olefins (0.3 mmol), bromodifluoroacetate (0.9 mmol), DiPEA (1.2 mmol, 155.1 mg), MeCN (1.5 mL) was added with a syringe under N<sub>2</sub> atmosphere, the vial was moved to an alloy plate and put into a Parr 4560 series autoclave (300 mL) under N<sub>2</sub> atmosphere. At room temperature, the autoclave was flushed with CO three times and charged with 5 bar CO. The autoclave was placed on a heating plate equipped with a magnetic stirrer. The reaction mixture was heated to 80 °C for 18 h. After the reaction was completed, the crude mixture was filtered and concentrated under vacuum. The crude product was purified by column chromatography (PE/EA=50/1 to 20/1) on silica gel to afford the products.

## 5. Scale-up reaction and transformation of the product **3aa**.

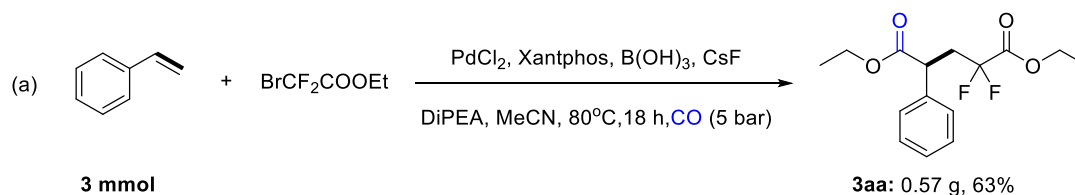

(a) A 30 mL screw-cap vial was charged with PdCl<sub>2</sub> (10 mol%, 53 mg), Xantphos (10 mol%, 174 mg), B(OH)<sub>3</sub> (4 mmol, 247 mg), CsF (3 mmol, 456 mg) and an oven-dried stirring bar. The vial was closed with a Teflon septum and cap and connected to the atmosphere via a needle. Then aryl olefins (3 mmol), bromodifluoroacetate (9 mmol), DiPEA (12 mmol, 1551 mg), MeCN (15 mL) was added with a syringe under N<sub>2</sub> atmosphere, the vial was moved to an alloy plate and put into a Parr 4560 series autoclave (300 mL) under N<sub>2</sub> atmosphere. At room temperature, the autoclave was flushed with CO three times and charged with 5 bar CO. The autoclave was placed on a heating plate equipped with a magnetic stirrer. The reaction mixture was heated to 80 °C for 18 h. After the reaction was completed, the crude mixture was filtered and concentrated under vacuum. The crude product was purified by column chromatography (PE/EA=50/1 to 20/1) on silica gel to afford the product **3aa** (570 mg, 63%).

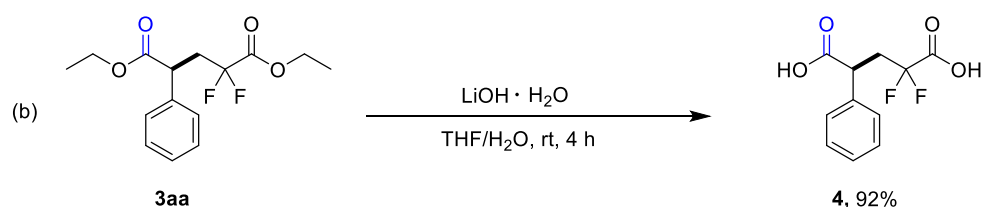

(b) **3aa** (0.3 mmol) and LiOH·H<sub>2</sub>O (5.1 mmol) were stirred in a THF/H<sub>2</sub>O (2.5:1) mixture at room temperature for 4 h. The mixture was then acidified to pH 1 with a 35% HCl solution and extracted with EtOAc (3 × 10 mL), and the combined organic layer was dried over Na<sub>2</sub>SO<sub>4</sub>, and purified by column chromatography (PE/EA = 1/1) on silica gel to afford the product **4** (67.3 mg, 92%).

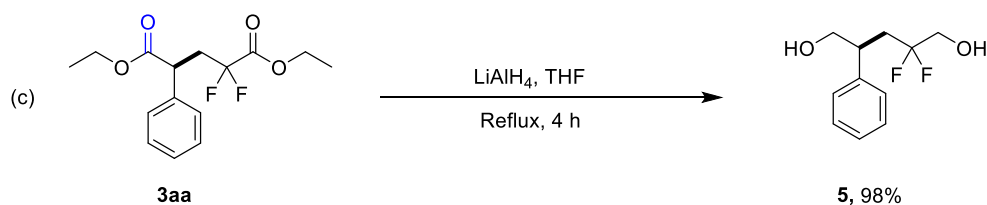

(c) To a stirred cold suspension (ice bath) of **3aa** (0.6 mmol) in dry THF (1 mL) was added LiAlH<sub>4</sub> (1.2 mL, 1.0 mol/L in THF) slowly under N<sub>2</sub>. The mixture was slowly warmed to the refluxing temperature for 4 h. The mixture was then cooled down to room temperature and quenched by addition of MeOH (1 mL) followed by addition of aq. solution of NaOH (10%, 1.6 mL). After the mixture was filtered through a pad of celite, THF was evaporated from the filtrate in vacuum. The resultant mixture was extracted with CH<sub>2</sub>Cl<sub>2</sub> (3 × 5 mL). The combined organic layers were washed with brine (2 × 5 mL) and dried over MgSO<sub>4</sub>. The solvent was removed in vacuum and the residue was purified by flash chromatography (PE/EA=2:1) to afford the desired product **5** (127.0 mg, 98%).



## 6. Mechanistic Studies.

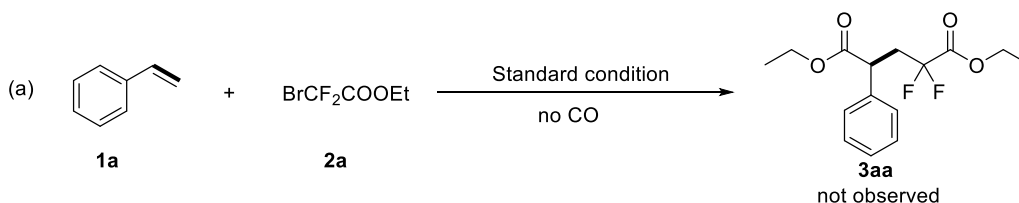

A 4 mL screw-cap vial was charged with PdCl<sub>2</sub> (10 mol%, 5.3 mg), Xantphos (10 mol%, 17.4 mg), B(OH)<sub>3</sub> (0.4 mmol, 24.7 mg), CsF (0.3 mmol, 45.6 mg) and an oven-dried stirring bar. The vial was closed with a Teflon septum and cap and connected to the atmosphere via a needle. Then aryl olefins (0.3 mmol), bromodifluoroacetate (0.9 mmol), DiPEA (1.2 mmol, 155.1 mg), MeCN (1.5 mL) was added with a syringe under N<sub>2</sub> atmosphere, the vial was moved to an alloy plate and put into a Parr 4560 series autoclave (300 mL) under N<sub>2</sub> atmosphere. At room temperature, the autoclave was flushed with N<sub>2</sub> three times. The autoclave was placed on a heating plate equipped with a magnetic stirrer. The reaction mixture was heated to 80 °C for 18 h. And **3aa** was not observed.

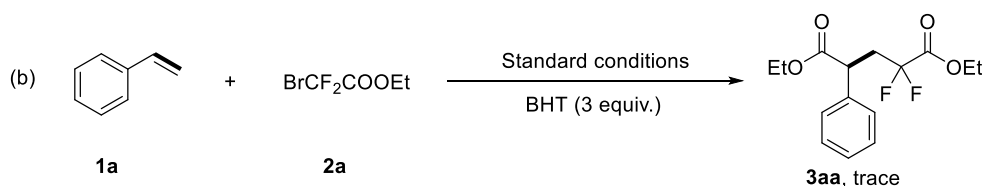

(b) A 4 mL screw-cap vial was charged with BHT (0.9 mmol, 198.2 mg), PdCl<sub>2</sub> (10 mol%, 5.3 mg), Xantphos (10 mol%, 17.4 mg), B(OH)<sub>3</sub> (0.4 mmol, 24.7 mg), CsF (0.3 mmol, 45.6 mg) and an oven-dried stirring bar. The vial was closed with a Teflon septum and cap and connected to the atmosphere via a needle. Then aryl olefins (0.3 mmol), bromodifluoroacetate (0.9 mmol), DiPEA (1.2 mmol, 155.1 mg), MeCN (1.5 mL) was added with a syringe under N<sub>2</sub> atmosphere, the vial was moved to an alloy plate and put into a Parr 4560 series autoclave (300 mL) under N<sub>2</sub> atmosphere. At room temperature, the autoclave was flushed with CO three times and charged with 5 bar CO. The autoclave was placed on a heating plate equipped with a magnetic stirrer. The reaction mixture was heated to 80 °C for 18 h. And **3aa** was detected trace (GC yield).

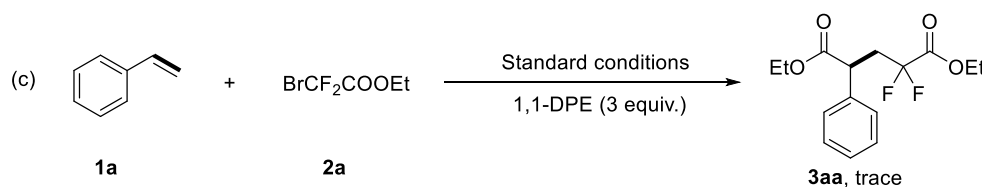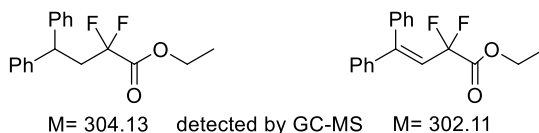

(c) A 4 mL screw-cap vial was charged with TEMPO (0.9 mmol, 140.6 mg), PdCl<sub>2</sub> (10 mol%, 5.3 mg), Xantphos (10 mol%, 17.4 mg), B(OH)<sub>3</sub> (0.4 mmol, 24.7 mg), CsF (0.3 mmol, 45.6 mg) and an oven-dried stirring bar. The vial was closed with a Teflon septum and cap and connected to the atmosphere via a needle. Then aryl olefins (0.3 mmol), bromodifluoroacetate (0.9 mmol), DiPEA (1.2 mmol, 155.1 mg), MeCN (1.5 mL) was added with a syringe under N<sub>2</sub> atmosphere, the vial was moved to an alloy plate and put into a Parr 4560 series autoclave (300 mL) under N<sub>2</sub> atmosphere. At room

temperature, the autoclave was flushed with CO three times and charged with 5 bar CO. The autoclave was placed on a heating plate equipped with a magnetic stirrer. The reaction mixture was heated to 80 °C for 18 h. And **3aa** was detected 23% yield (GC yield).

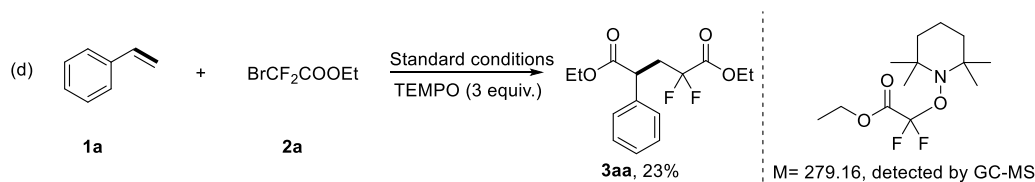

(d) A 4 mL screw-cap vial was charged with 1, 1-DPE (0.9 mol, 162.1 mg), PdCl<sub>2</sub> (10 mol%, 5.3 mg), Xantphos (10 mol%, 17.4 mg), B(OH)<sub>3</sub> (0.4 mmol, 24.7 mg), CsF (0.3 mmol, 45.6 mg) and an oven-dried stirring bar. The vial was closed with a Teflon septum and cap and connected to the atmosphere via a needle. Then aryl olefins (0.3 mmol), bromodifluoroacetate (0.9 mmol), DiPEA (1.2 mmol, 155.1 mg), MeCN (1.5 mL) was added with a syringe under N<sub>2</sub> atmosphere, the vial was moved to an alloy plate and put into a Parr 4560 series autoclave (300 mL) under N<sub>2</sub> atmosphere. At room temperature, the autoclave was flushed with CO three times and charged with 5 bar CO. The autoclave was placed on a heating plate equipped with a magnetic stirrer. The reaction mixture was heated to 80 °C for 18 h. And **3aa** was detected trace (GC yield).

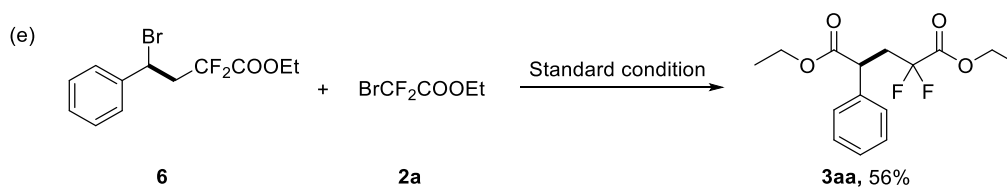

(e) A 4 mL screw-cap vial was charged with PdCl<sub>2</sub> (10 mol%, 5.3 mg), Xantphos (10 mol%, 17.4 mg), B(OH)<sub>3</sub> (0.4 mmol, 24.7 mg), CsF (0.3 mmol, 45.6 mg) and an oven-dried stirring bar. The vial was closed with a Teflon septum and cap and connected to the atmosphere via a needle. Then **6** (0.3 mmol), **2a** (0.9 mmol), DiPEA (1.2 mmol, 155.1 mg), MeCN (1.5 mL) was added with a syringe under N<sub>2</sub> atmosphere, the vial was moved to an alloy plate and put into a Parr 4560 series autoclave (300 mL) under N<sub>2</sub> atmosphere. At room temperature, the autoclave was flushed with CO three times and charged with 5 bar CO. The autoclave was placed on a heating plate equipped with a magnetic stirrer. The reaction mixture was heated to 80 °C for 18 h. And **3aa** was detected 56% (GC yield).

## 7. Characterization of Substrates and Products

### 7.1 Substrates

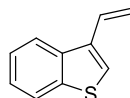

3-vinylbenzo[b]thiophene (**1p**)<sup>4</sup>

<sup>1</sup>H NMR (400 MHz, CDCl<sub>3</sub>) δ 7.99 (d, *J* = 7.7 Hz, 1H), 7.92 (d, *J* = 7.6 Hz, 1H), 7.51 (s, 1H), 7.50 – 7.39 (m, 2H), 7.04 (dd, *J* = 17.6, 11.1 Hz, 1H), 5.87 (dd, *J* = 17.6, 1.1 Hz, 1H), 5.45 (dd, *J* = 11.1, 1.1 Hz, 1H).

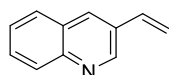

3-vinylquinoline (**1q**)<sup>1</sup>

<sup>1</sup>H NMR (400 MHz, CDCl<sub>3</sub>) δ 8.95 (d, *J* = 2.0 Hz, 1H), 8.02 (d, *J* = 8.4 Hz, 1H), 7.90 (d, *J* = 1.6 Hz, 1H), 7.65 (d, *J* = 8.2 Hz, 1H), 7.61 – 7.53 (m, 1H), 7.41 (t, *J* = 7.5 Hz, 1H), 6.74 (dd, *J* = 17.7, 11.0 Hz, 1H), 5.87 (d, *J* = 17.7 Hz, 1H), 5.35 (d, *J* = 11.0 Hz, 1H).

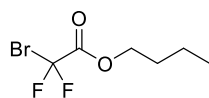

Butyl 2-bromo-2,2-difluoroacetate (**2b**)<sup>2</sup>

<sup>1</sup>H NMR (400 MHz, CDCl<sub>3</sub>) δ 4.35 (t, *J* = 6.6 Hz, 2H), 1.81 – 1.65 (m, 2H), 1.43 (dd, *J* = 15.0, 7.5 Hz, 2H), 0.95 (t, *J* = 7.4 Hz, 3H).

<sup>13</sup>C NMR (101 MHz, CDCl<sub>3</sub>) δ 159.7 (t, *J* = 31.2 Hz), 108.8 (t, *J* = 314.3 Hz), 68.2, 30.1, 18.8, 13.5.

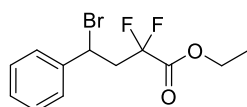

Ethyl 4-bromo-2,2-difluoro-4-phenylbutanoate (**6**)<sup>3</sup>

<sup>1</sup>H NMR (400 MHz, CDCl<sub>3</sub>) δ 7.41 (d, *J* = 7.4 Hz, 2H), 7.35 (t, *J* = 7.5 Hz, 2H), 7.31 (t, *J* = 7.3 Hz, 1H), 5.17 (t, *J* = 7.3 Hz, 1H), 4.16 – 4.06 (m, 2H), 3.24 – 3.06 (m, 2H), 1.28 (t, *J* = 7.2 Hz, 3H).

### 7.2 Products

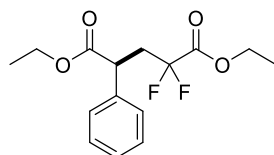

Diethyl 2,2-difluoro-4-phenylpentanedioate (**3aa**)

The title compound was prepared from styrene (31.2 mg, 0.3 mmol) and ethyl bromodifluoroacetate (181.7 mg, 0.9 mmol) according to general procedure. The crude residue was purified by flash chromatography (PE/EA = 50:1 to 20:1) to give the product as a colorless oil (70.2 mg, 78%).

<sup>1</sup>H NMR (400 MHz, CDCl<sub>3</sub>) δ 7.35 – 7.24 (m, 5H), 4.23 – 4.02 (m, 4H), 3.91 (dd, *J* = 8.6, 5.2 Hz, 1H), 3.14 – 2.97 (m, 1H), 2.57 – 2.41 (m, 1H), 1.28 (t, *J* = 7.2 Hz, 3H), 1.18 (t, *J* = 7.1 Hz, 3H).

$^{13}\text{C}$  NMR (101 MHz,  $\text{CDCl}_3$ )  $\delta$  172.3, 163.5 (t,  $J = 32.4$  Hz), 137.6, 128.8, 127.7, 114.9 (t,  $J = 251.0$  Hz), 62.9, 61.3, 44.8 (t,  $J = 4.2$  Hz), 37.9 (t,  $J = 23.4$  Hz), 13.8, 13.7.

$^{19}\text{F}$  NMR (56 MHz,  $\text{CDCl}_3$ )  $\delta$  -109.9 – -110.2 (m, 2F).

HRMS (EI): Calcd. for  $\text{C}_{15}\text{H}_{18}\text{F}_2\text{O}_4$   $[\text{M}+\text{H}]^+$  300.1246, found: 300.1249.

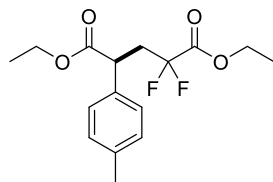

#### Diethyl 2,2-difluoro-4-(p-tolyl)pentanedioate (**3ba**)

The title compound was prepared from 1-methyl-4-vinylbenzene (35.4 mg, 0.3 mmol) and ethyl bromodifluoroacetate (181.7 mg, 0.9 mmol) according to general procedure. The crude residue was purified by flash chromatography (PE/EA = 50:1 to 20:1) to give the product as a colorless oil (68.8 mg, 73%).

$^1\text{H}$  NMR (400 MHz,  $\text{CDCl}_3$ )  $\delta$  7.18 (d,  $J = 8.1$  Hz, 2H), 7.13 (d,  $J = 8.1$  Hz, 2H), 4.24 – 4.01 (m, 4H), 3.87 (dd,  $J = 8.6, 5.1$  Hz, 1H), 3.11 – 2.95 (m, 1H), 2.55 – 2.39 (m, 1H), 2.32 (s, 3H), 1.30 (t,  $J = 7.2$  Hz, 3H), 1.19 (t,  $J = 7.1$  Hz, 3H).

$^{13}\text{C}$  NMR (101 MHz,  $\text{CDCl}_3$ )  $\delta$  172.5, 163.6 (t,  $J = 32.4$  Hz), 137.5, 134.6, 129.5, 127.6, 115.0 (t,  $J = 250.9$  Hz), 62.9, 61.3, 44.5 (t,  $J = 4.2$  Hz), 38.0 (t,  $J = 23.3$  Hz), 21.0, 13.9, 13.8.

$^{19}\text{F}$  NMR (56 MHz,  $\text{CDCl}_3$ )  $\delta$  -110.0 – -110.3 (m, 2F).

HRMS (EI): Calcd. for  $\text{C}_{16}\text{H}_{20}\text{F}_2\text{O}_4$   $[\text{M}+\text{H}]^+$  315.1402, found: 315.1405.

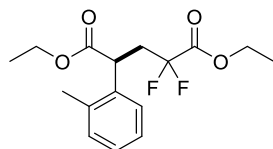

#### Diethyl 2,2-difluoro-4-(o-tolyl)pentanedioate (**3ca**)

The title compound was prepared from 1-methyl-2-vinylbenzene (35.4 mg, 0.3 mmol) and ethyl bromodifluoroacetate (181.7 mg, 0.9 mmol) according to general procedure. The crude residue was purified by flash chromatography (PE/EA = 50:1 to 20:1) to give the product as a colorless oil (42.4 mg, 45%).

$^1\text{H}$  NMR (400 MHz,  $\text{CDCl}_3$ )  $\delta$  7.25 – 7.13 (m, 4H), 4.22 – 4.02 (m, 5H), 3.15 – 2.98 (m, 1H), 2.51 – 2.35 (m, 4H), 1.29 (t,  $J = 7.1$  Hz, 1H), 1.18 (t,  $J = 7.1$  Hz, 1H).

$^{13}\text{C}$  NMR (101 MHz,  $\text{CDCl}_3$ )  $\delta$  172.7, 163.7 (t,  $J = 32.5$  Hz), 136.2, 136.2, 130.8, 127.6, 126.7, 126.5, 115.1 (t,  $J = 250.8$  Hz), 63.0, 61.3, 40.3 (t,  $J = 4.2$  Hz), 37.6 (t,  $J = 23.6$  Hz), 19.6, 14.0, 13.8.

$^{19}\text{F}$  NMR (56 MHz,  $\text{CDCl}_3$ )  $\delta$  -109.2 – -109.4 (m, 2F).

HRMS (EI): Calcd. for  $\text{C}_{16}\text{H}_{20}\text{F}_2\text{O}_4$   $[\text{M}+\text{H}]^+$  315.1402, found: 315.1393.

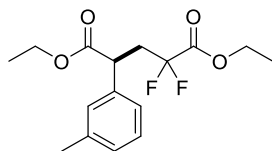

Diethyl 2,2-difluoro-4-(*m*-tolyl)pentanedioate (**3da**)

The title compound was prepared from 1-methyl-3-vinylbenzene (35.4 mg, 0.3 mmol) and ethyl bromodifluoroacetate (181.7 mg, 0.9 mmol) according to general procedure. The crude residue was purified by flash chromatography (PE/EA = 50:1 to 20:1) to give the product as a colorless oil (37.7 mg, 40%).

<sup>1</sup>H NMR (400 MHz, CDCl<sub>3</sub>) δ 7.21 (t, *J* = 7.4 Hz, 1H), 7.09 (d, *J* = 8.0 Hz, 3H), 4.27 – 4.02 (m, 4H), 3.86 (dd, *J* = 8.7, 4.9 Hz, 1H), 3.15 – 2.96 (m, 1H), 2.55 – 2.39 (m, 1H), 2.34 (s, 3H), 1.30 (t, *J* = 7.1 Hz, 3H), 1.20 (t, *J* = 7.1 Hz, 3H).

<sup>13</sup>C NMR (101 MHz, CDCl<sub>3</sub>) δ 172.5, 163.7 (t, *J* = 32.5 Hz), 138.6, 137.6, 128.7, 128.5, 128.4, 124.8, 115.0 (t, *J* = 25.1 Hz), 63.0, 61.3, 44.8 (t, *J* = 4.2 Hz), 38.0 (t, *J* = 23.4 Hz), 21.4, 14.0, 13.8.

<sup>19</sup>F NMR (56 MHz, CDCl<sub>3</sub>) δ -109.7 – -110.0 (m, 2F).

HRMS (EI): Calcd. for C<sub>16</sub>H<sub>20</sub>F<sub>2</sub>O<sub>4</sub> [M+H]<sup>+</sup> 315.1402, found: 315.1392.

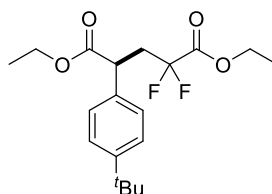

Diethyl 4-(4-(*tert*-butyl)phenyl)-2,2-difluoropentanedioate (**3ea**)

The title compound was prepared from 1-(*tert*-butyl)-4-vinylbenzene (48.0 mg, 0.3 mmol) and ethyl bromodifluoroacetate (181.7 mg, 0.9 mmol) according to general procedure. The crude residue was purified by flash chromatography (PE/EA = 50:1 to 20:1) to give the product as a colorless oil (90 mg, 84%).

<sup>1</sup>H NMR (400 MHz, CDCl<sub>3</sub>) δ 7.34 (d, *J* = 8.3 Hz, 2H), 7.22 (d, *J* = 8.3 Hz, 2H), 4.22 – 4.02 (m, 4H), 3.88 (dd, *J* = 8.7, 5.1 Hz, 1H), 3.12 – 2.96 (m, 1H), 2.57 – 2.40 (m, 1H), 1.31 – 1.26 (m, 12H), 1.21 (t, *J* = 7.1 Hz, 3H).

<sup>13</sup>C NMR (101 MHz, CDCl<sub>3</sub>) δ 172.5, 163.7 (t, *J* = 32.5 Hz), 150.7, 134.5, 127.4, 125.8, 115.1 (t, *J* = 25.0 Hz), 62.9, 61.3, 44.4 (t, *J* = 4.2 Hz), 38.1 (t, *J* = 23.5 Hz), 31.4, 31.3, 14.0, 13.8.

<sup>19</sup>F NMR (56 MHz, CDCl<sub>3</sub>) δ -109.8 – -110.2 (m, 2F).

HRMS (EI): Calcd. for C<sub>19</sub>H<sub>26</sub>F<sub>2</sub>O<sub>4</sub> [M+NH<sub>4</sub>]<sup>+</sup> 374.2137, found: 374.2139.

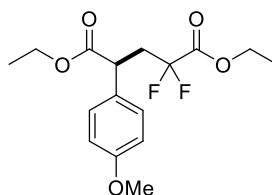

Diethyl 2,2-difluoro-4-(4-methoxyphenyl)pentanedioate (**3fa**)

The title compound was prepared from 1-methoxy-4-vinylbenzene (42.2 mg, 0.3 mmol) and ethyl bromodifluoroacetate (181.7 mg, 0.9 mmol) according to general procedure. The crude residue was purified by flash chromatography (PE/EA = 50:1 to 20:1) to give the product as a colorless oil (87.1 mg,

88%).

**<sup>1</sup>H NMR (400 MHz, CDCl<sub>3</sub>)** δ 7.21 (d, *J* = 8.6 Hz, 2H), 6.84 (d, *J* = 8.7 Hz, 2H), 4.25 – 4.01 (m, 4H), 3.84 (dd, *J* = 8.4, 5.4 Hz, 1H), 3.78 (s, 3H), 3.10 – 2.93 (m, 1H), 2.56 – 2.39 (m, 1H), 1.29 (t, *J* = 7.2 Hz, 3H), 1.19 (t, *J* = 7.1 Hz, 3H).

**<sup>13</sup>C NMR (101 MHz, CDCl<sub>3</sub>)** δ 172.6, 163.6 (t, *J* = 32.4 Hz), 159.1, 129.5, 128.8, 115.0 (t, *J* = 251.0 Hz), 114.1, 62.9, 61.2, 55.2, 44.0 (t, *J* = 4.2 Hz), 38.0 (t, *J* = 23.4 Hz), 13.9, 13.7.

**<sup>19</sup>F NMR (56 MHz, CDCl<sub>3</sub>)** δ -109.8 – -110.6 (m, 2F).

**HRMS (EI):** Calcd. for C<sub>16</sub>H<sub>20</sub>F<sub>2</sub>O<sub>5</sub> [M+H]<sup>+</sup> 331.1352, found: 331.1348.

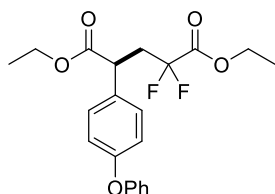

**Diethyl 2,2-difluoro-4-(4-phenoxyphenyl)pentanedioate (3ga)**

The title compound was prepared from 1-phenoxy-4-vinylbenzene (58.8 mg, 0.3 mmol) and ethyl bromodifluoroacetate (181.7 mg, 0.9 mmol) according to general procedure. The crude residue was purified by flash chromatography (PE/EA = 50:1 to 20:1) to give the product as a colorless oil (88.2 mg, 75%).

**<sup>1</sup>H NMR (400 MHz, CDCl<sub>3</sub>)** δ 7.33 (t, *J* = 7.9 Hz, 2H), 7.25 (d, *J* = 8.6 Hz, 2H), 7.11 (t, *J* = 7.4 Hz, 1H), 7.00 (d, *J* = 7.8 Hz, 2H), 6.95 (d, *J* = 8.6 Hz, 2H), 4.27 – 4.04 (m, 4H), 3.89 (dd, *J* = 8.6, 5.2 Hz, 1H), 3.13 – 2.95 (m, 1H), 2.57 – 2.34 (m, 1H), 1.31 (t, *J* = 7.1 Hz, 3H), 1.21 (t, *J* = 7.1 Hz, 3H).

**<sup>13</sup>C NMR (101 MHz, CDCl<sub>3</sub>)** δ 172.4, 163.6 (t, *J* = 32.4 Hz), 157.0, 156.7, 132.1, 129.7, 129.1, 123.5, 119.1, 118.8, 114.9 (t, *J* = 251.1 Hz), 62.9, 61.3, 44.2 (t, *J* = 4.1 Hz), 37.9 (t, *J* = 23.4 Hz), 13.9, 13.8.

**<sup>19</sup>F NMR (56 MHz, CDCl<sub>3</sub>)** δ -109.9 – -110.2 (m, 2F).

**HRMS (EI):** Calcd. for C<sub>21</sub>H<sub>22</sub>F<sub>2</sub>O<sub>5</sub> [M+K]<sup>+</sup> 431.1067, found: 431.1070.

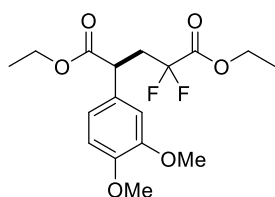

**Diethyl 4-(3,4-dimethoxyphenyl)-2,2-difluoropentanedioate (3ha)**

The title compound was prepared from 1,2-dimethoxy-4-vinylbenzene (49.2 mg, 0.3 mmol) and ethyl bromodifluoroacetate (181.7 mg, 0.9 mmol) according to general procedure. The crude residue was purified by flash chromatography (PE/EA = 50:1 to 20:1) to give the product as a colorless oil (82.1 mg, 76%).

**<sup>1</sup>H NMR (400 MHz, CDCl<sub>3</sub>)** δ 6.85 – 6.75 (m, 3H), 4.23 – 4.01 (m, 4H), 3.85 (s, 3H), 3.84 – 3.78 (m, 4H), 3.09 – 2.90 (m, 1H), 2.55 – 2.36 (m, 1H), 1.27 (t, *J* = 7.1 Hz, 3H), 1.18 (t, *J* = 7.1 Hz, 3H).

**<sup>13</sup>C NMR (101 MHz, CDCl<sub>3</sub>)** δ 172.4, 163.6 (t, *J* = 32.4 Hz), 149.0, 148.5, 129.9, 119.9, 114.9 (t, *J* = 251.1 Hz), 111.2, 110.7, 62.9, 61.2, 55.8, 55.8, 44.4 (t, *J* = 4.2 Hz), 38.0 (t, *J* = 23.4 Hz), 13.9, 13.7.

**<sup>19</sup>F NMR (56 MHz, CDCl<sub>3</sub>)** δ -109.9 – -110.2 (m, 2F).

**HRMS (EI):** Calcd. for C<sub>17</sub>H<sub>22</sub>F<sub>2</sub>O<sub>6</sub> [M+NH<sub>4</sub>]<sup>+</sup> 378.1723 found: 378.1728

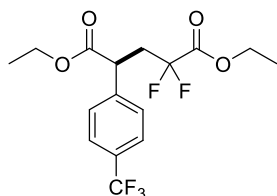

Diethyl 2,2-difluoro-4-(4-(trifluoromethyl)phenyl)pentanedioate (**3ia**)

The title compound was prepared from 1-(trifluoromethyl)-4-vinylbenzene (51.6 mg, 0.3 mmol) and ethyl bromodifluoroacetate (181.7 mg, 0.9 mmol) according to general procedure. The crude residue was purified by flash chromatography (PE/EA = 50:1 to 20:1) to give the product as a colorless oil (60.7 mg, 55%).

**<sup>1</sup>H NMR (400 MHz, CDCl<sub>3</sub>)** δ 7.59 (d, *J* = 8.2 Hz, 2H), 7.43 (d, *J* = 8.1 Hz, 2H), 4.26 – 4.04 (m, 4H), 3.98 (dd, *J* = 8.2, 5.5 Hz, 1H), 3.14 – 2.98 (m, 1H), 2.57 – 2.37 (m, 1H), 1.30 (t, *J* = 7.1 Hz, 3H), 1.20 (t, *J* = 7.1 Hz, 3H).

**<sup>13</sup>C NMR (101 MHz, CDCl<sub>3</sub>)** δ 171.7, 163.5 (t, *J* = 32.4 Hz), 141.6, 130.1 (q, *J* = 32.7 Hz), 128.3, 125.8 (q, *J* = 3.7 Hz), 123.9 (q, *J* = 272.3 Hz), 114.8 (t, *J* = 251.4 Hz), 63.1, 61.7, 44.8 (t, *J* = 4.0 Hz), 37.7 (t, *J* = 23.5 Hz), 13.9, 13.8.

**<sup>19</sup>F NMR (56 MHz, CDCl<sub>3</sub>)** δ -67.9 (s, 3F), -110.2 (t, *J* = 16.5 Hz, 2F).

**HRMS (EI):** Calcd. for C<sub>16</sub>H<sub>17</sub>F<sub>5</sub>O<sub>4</sub> [M+Na]<sup>+</sup> 391.0939, found: 391.0933.

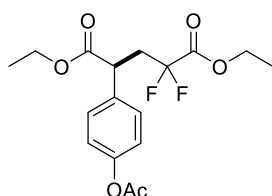

Diethyl 4-(4-acetoxyphenyl)-2,2-difluoropentanedioate (**3ja**)

The title compound was prepared from 4-vinylphenyl acetate (48.6 mg, 0.3 mmol) and ethyl bromodifluoroacetate (181.7 mg, 0.9 mmol) according to general procedure. The crude residue was purified by flash chromatography (PE/EA = 50:1 to 20:1) to give the product as a colorless oil (82.7 mg, 77%).

**<sup>1</sup>H NMR (400 MHz, CDCl<sub>3</sub>)** δ 7.30 (d, *J* = 8.5 Hz, 2H), 7.04 (d, *J* = 8.5 Hz, 2H), 4.23 – 4.01 (m, 4H), 3.89 (dd, *J* = 8.5, 5.2 Hz, 1H), 3.10 – 2.94 (m, 1H), 2.56 – 2.38 (m, 1H), 2.27 (s, 3H), 1.28 (t, *J* = 7.1 Hz, 3H), 1.19 (t, *J* = 7.1 Hz, 3H).

**<sup>13</sup>C NMR (101 MHz, CDCl<sub>3</sub>)** δ 172.1, 169.3, 163.5 (t, *J* = 32.4 Hz), 150.2, 134.9, 128.8, 121.9, 114.8 (t, *J* = 251.1 Hz), 63.0, 61.4, 44.3 (t, *J* = 42.0 Hz), 37.9 (t, *J* = 23.4 Hz), 21.0, 13.9, 13.7.

**<sup>19</sup>F NMR (56 MHz, CDCl<sub>3</sub>)** δ -109.6 – -110.6 (m, 2F).

**HRMS (EI):** Calcd. for C<sub>17</sub>H<sub>20</sub>F<sub>2</sub>O<sub>6</sub> [M+NH<sub>4</sub>]<sup>+</sup> 376.1566, found: 376.1562.

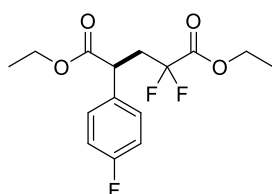

Diethyl 2,2-difluoro-4-(4-fluorophenyl)pentanedioate (**3ka**)

The title compound was prepared from 1-fluoro-4-vinylbenzene (36.6 mg, 0.3 mmol) and ethyl

bromodifluoroacetate (181.7 mg, 0.9 mmol) according to general procedure. The crude residue was purified by flash chromatography (PE/EA = 50:1 to 20:1) to give the product as a colorless oil (62.0 mg, 65%).

**<sup>1</sup>H NMR (400 MHz, CDCl<sub>3</sub>)** δ 7.30–7.25 (m, 2H), 7.05–6.99 (m, 2H), 4.26–4.04 (m, 4H), 3.90 (dd, *J* = 8.4, 5.5 Hz, 1H), 3.11–2.94 (m, 1H), 2.55–2.39 (m, 1H), 1.31 (t, *J* = 7.2 Hz, 3H), 1.20 (t, *J* = 7.1 Hz, 3H).

**<sup>13</sup>C NMR (101 MHz, CDCl<sub>3</sub>)** δ 172.2, 163.5 (t, *J* = 32.4 Hz), 162.3 (d, *J* = 246.7 Hz), 133.3 (d, *J* = 3.3 Hz), 129.4 (d, *J* = 8.1 Hz), 115.7 (d, *J* = 21.6 Hz), 114.9 (t, *J* = 251.3 Hz), 63.0, 61.4, 44.1 (t, *J* = 4.2 Hz), 37.9 (t, *J* = 23.5 Hz), 13.9, 13.8.

**<sup>19</sup>F NMR (56 MHz, CDCl<sub>3</sub>)** δ -110.1 (dd, *J* = 16.4, 5.5 Hz, 1F), -110.4 (dd, *J* = 16.2, 5.8 Hz, 1F), -119.2–-120.0 (m, 1F).

**HRMS (EI):** Calcd. for C<sub>15</sub>H<sub>17</sub>F<sub>3</sub>O<sub>4</sub> [M+H]<sup>+</sup> 341.0971, found: 341.0965.

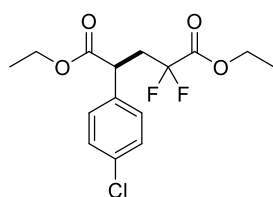

Diethyl 4-(4-chlorophenyl)-2,2-difluoropentanedioate (**31a**)

The title compound was prepared from 1-chloro-4-vinylbenzene (41.4 mg, 0.3 mmol) and ethyl bromodifluoroacetate (181.7 mg, 0.9 mmol) according to general procedure. The crude residue was purified by flash chromatography (PE/EA = 50:1 to 20:1) to give the product as a colorless oil (68.1 mg, 68%).

**<sup>1</sup>H NMR (400 MHz, CDCl<sub>3</sub>)** δ 7.30 (d, *J* = 8.5 Hz, 2H), 7.23 (d, *J* = 8.5 Hz, 2H), 4.26–4.03 (m, 4H), 3.88 (dd, *J* = 8.3, 5.5 Hz, 1H), 3.11–2.93 (m, 1H), 2.54–2.37 (m, 1H), 1.30 (t, *J* = 7.2 Hz, 3H), 1.19 (t, *J* = 7.1 Hz, 3H).

**<sup>13</sup>C NMR (101 MHz, CDCl<sub>3</sub>)** δ 172.0, 163.5 (t, *J* = 32.3 Hz), 136.1, 133.7, 129.1, 129.0, 114.8 (t, *J* = 251.3 Hz), 63.0, 61.5, 44.3 (t, *J* = 4.1 Hz), 37.7 (t, *J* = 23.5 Hz), 13.9, 13.8.

**<sup>19</sup>F NMR (56 MHz, CDCl<sub>3</sub>)** δ -109.9–-110.2 (m, 2F).

**HRMS (EI):** Calcd. for C<sub>15</sub>H<sub>17</sub>ClF<sub>2</sub>O<sub>4</sub> [M+Na]<sup>+</sup> 357.0676, found: 357.0664.

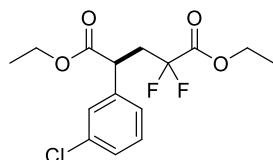

Diethyl 4-(3-chlorophenyl)-2,2-difluoropentanedioate (**31a**)

The title compound was prepared from 1-chloro-3-vinylbenzene (41.4 mg, 0.3 mmol) and ethyl bromodifluoroacetate (181.7 mg, 0.9 mmol) according to general procedure. The crude residue was purified by flash chromatography (PE/EA = 50:1 to 20:1) to give the product as a colorless oil (66.2 mg, 66%).

**<sup>1</sup>H NMR (400 MHz, CDCl<sub>3</sub>)** δ 7.35–7.26 (m, 3H), 7.24–7.19 (m, 1H), 4.29–4.07 (m, 4H), 3.90 (dd, *J* = 7.9, 5.7 Hz, 1H), 3.15–2.92 (m, 1H), 2.57–2.40 (m, 1H), 1.33 (t, *J* = 7.1 Hz, 3H), 1.23 (t, *J* = 7.1 Hz, 3H).



$^{13}\text{C}$  NMR (101 MHz,  $\text{CDCl}_3$ )  $\delta$  171.8, 163.5 (t,  $J = 32.3$  Hz), 139.5, 134.7, 130.1, 128.1, 128.0, 126.1, 114.8 (t,  $J = 251.3$  Hz), 63.1, 61.6, 44.6 (t,  $J = 4.1$  Hz), 37.8 (t,  $J = 23.5$  Hz) 13.9, 13.8.

$^{19}\text{F}$  NMR (56 MHz,  $\text{CDCl}_3$ )  $\delta$  -109.9–-110.0 (m, 2F).

HRMS (EI): Calcd. for  $\text{C}_{15}\text{H}_{17}\text{ClF}_2\text{O}_4$   $[\text{M}+\text{NH}_4]^+$  352.1122, found: 352.1109.

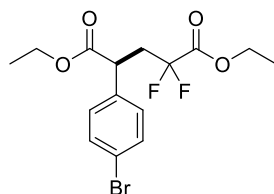

Diethyl 4-(4-bromophenyl)-2,2-difluoropentanedioate (**3na**)

The title compound was prepared from 1-bromo-4-vinylbenzene (54.6 mg, 0.3 mmol) and ethyl bromodifluoroacetate (181.7 mg, 0.9 mmol) according to general procedure. The crude residue was purified by flash chromatography (PE/EA = 50:1 to 20:1) to give the product as a colorless oil (68.0 mg, 60%).

$^1\text{H}$  NMR (400 MHz,  $\text{CDCl}_3$ )  $\delta$  7.45 (d,  $J = 8.4$  Hz, 2H), 7.17 (d,  $J = 8.4$  Hz, 2H), 4.25 – 4.03 (m, 4H), 3.87 (dd,  $J = 8.3, 5.5$  Hz, 1H), 3.10 – 2.93 (m, 1H), 2.53 – 2.38 (m, 1H), 1.30 (t,  $J = 7.2$  Hz, 3H), 1.19 (t,  $J = 7.1$  Hz, 3H).

$^{13}\text{C}$  NMR (101 MHz,  $\text{CDCl}_3$ )  $\delta$  171.9, 163.5 (t,  $J = 32.3$  Hz), 136.6, 131.9, 129.5, 121.8, 114.8 (t,  $J = 251.4$  Hz), 63.0, 61.5, 44.4 (t,  $J = 4.1$  Hz), 37.7 (t,  $J = 23.5$  Hz), 13.9, 13.8.

$^{19}\text{F}$  NMR (56 MHz,  $\text{CDCl}_3$ )  $\delta$  -109.7 – -110.0 (m, 2F).

HRMS (EI): Calcd. for  $\text{C}_{15}\text{H}_{17}\text{BrF}_2\text{O}_4$   $[\text{M}+\text{NH}_4]^+$  396.0617, found: 396.0611.

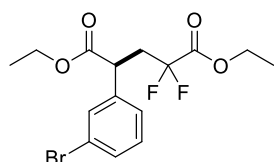

Diethyl 4-(3-bromophenyl)-2,2-difluoropentanedioate (**3oa**)

The title compound was prepared from 1-bromo-3-vinylbenzene (54.6 mg, 0.3 mmol) and ethyl bromodifluoroacetate (181.7 mg, 0.9 mmol) according to general procedure. The crude residue was purified by flash chromatography (181.8 mg, 0.9 mmol) to give the product as a colorless oil (51 mg, 45%).

$^1\text{H}$  NMR (400 MHz,  $\text{CDCl}_3$ )  $\delta$  7.45 (s, 1H), 7.42 (d,  $J = 7.5$  Hz, 1H), 7.25 – 7.17 (m, 2H), 4.27 – 4.04 (m, 4H), 3.87 (dd,  $J = 8.1, 5.5$  Hz, 1H), 3.11 – 2.94 (m, 1H), 2.54 – 2.39 (m, 1H), 1.31 (t,  $J = 7.1$  Hz, 3H), 1.20 (t,  $J = 7.1$  Hz, 3H).

$^{13}\text{C}$  NMR (101 MHz,  $\text{CDCl}_3$ )  $\delta$  171.8, 163.5 (t,  $J = 32.3$  Hz), 139.8, 131.0, 131.0, 130.4, 126.6, 122.8, 114.8 (t,  $J = 251.4$  Hz), 63.1, 61.6, 44.6 (t,  $J = 4.0$  Hz), 37.8 (t,  $J = 23.6$  Hz), 14.0, 13.9.

$^{19}\text{F}$  NMR (56 MHz,  $\text{CDCl}_3$ )  $\delta$  -109.9–-110.2 (m, 2F).

HRMS (EI): Calcd. for  $\text{C}_{15}\text{H}_{17}\text{BrF}_2\text{O}_4$   $[\text{M}+\text{NH}_4]^+$  396.0617, found: 396.0606.

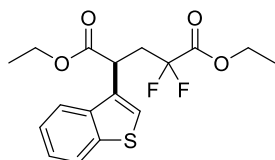

Diethyl 4-(benzo[b]thiophen-3-yl)-2,2-difluoropentanedioate (**3pa**)

The title compound was prepared from 3-vinylbenzo[b]thiophene (48 mg, 0.3 mmol) and ethyl bromodifluoroacetate (181.7 mg, 0.9 mmol) according to general procedure. The crude residue was purified by flash chromatography (PE/EA = 50:1 to 20:1) to give the product as a colorless oil (21.4 mg, 20%).

<sup>1</sup>H NMR (400 MHz, CDCl<sub>3</sub>) δ 7.86 (d, *J* = 7.8 Hz, 2H), 7.43 (t, *J* = 7.4 Hz, 1H), 7.38 (t, *J* = 7.5 Hz, 1H), 7.34 (s, 1H), 4.38 (dd, *J* = 8.8, 4.6 Hz, 1H), 4.26 – 4.07 (m, 4H), 3.24 – 3.04 (m, 1H), 2.70 – 2.54 (m, 1H), 1.27 – 1.17 (m, 6H).

<sup>13</sup>C NMR (101 MHz, CDCl<sub>3</sub>) δ 171.8, 163.5 (t, *J* = 32.4 Hz), 140.4, 137.3, 131.6, 124.7, 124.4, 124.0, 123.0, 121.7, 115.0 (t, *J* = 251.3 Hz), 63.1, 61.6, 38.8 (t, *J* = 4.5 Hz), 37.1 (t, *J* = 23.5 Hz), 14.0, 13.8.

<sup>19</sup>F NMR (56 MHz, CDCl<sub>3</sub>) δ -108.9 – -109.4 (m, 2F).

HRMS (EI): Calcd. for C<sub>17</sub>H<sub>18</sub>F<sub>2</sub>O<sub>4</sub>S [M+NH<sub>4</sub>]<sup>+</sup> 374.1232, found: 374.1221.

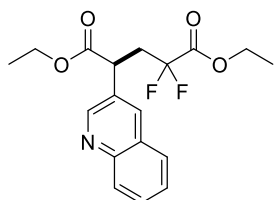

Diethyl 2,2-difluoro-4-(quinolin-3-yl)pentanedioate (**3qa**)

The title compound was prepared from 3-vinylquinoline (46.5 mg, 0.3 mmol) and ethyl bromodifluoroacetate (181.7 mg, 0.9 mmol) according to general procedure. The crude residue was purified by flash chromatography (PE/EA = 50:1 to 20:1) to give the product as a colorless oil (35.8 mg, 34%).

<sup>1</sup>H NMR (400 MHz, CDCl<sub>3</sub>) δ 8.87 (s, 1H), 8.10 (d, *J* = 8.7 Hz, 2H), 7.81 (d, *J* = 8.1 Hz, 1H), 7.72 (t, *J* = 7.6 Hz, 1H), 7.56 (t, *J* = 7.5 Hz, 1H), 4.25 – 4.05 (m, 5H), 2.71 – 3.08 (m, 1H), 3.28 – 2.54 (m, 1H), 1.27 (t, *J* = 7.1 Hz, 3H), 1.20 (t, *J* = 7.1 Hz, 3H).

<sup>13</sup>C NMR (101 MHz, CDCl<sub>3</sub>) δ 171.7, 163.5 (t, *J* = 32.4 Hz), 150.4, 147.6, 134.5, 130.5, 129.8, 129.3, 127.8, 127.7, 127.2, 114.8 (t, *J* = 251.7 Hz), 63.2, 61.9, 42.7 (t, *J* = 4.0 Hz), 37.7 (t, *J* = 23.5 Hz), 14.0, 13.8.

<sup>19</sup>F NMR (56 MHz, CDCl<sub>3</sub>) δ -108.7 – -109.0 (m, 2F).

HRMS (EI): Calcd. for C<sub>18</sub>H<sub>19</sub>F<sub>2</sub>NO<sub>4</sub> [M+NH<sub>4</sub>]<sup>+</sup> 369.1620, found: 369.1623.

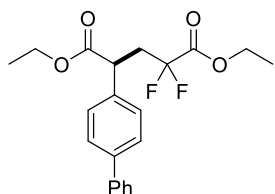

Diethyl 4-([1,1'-biphenyl]-4-yl)-2,2-difluoropentanedioate (**3ra**)

The title compound was prepared from 4-vinyl-1,1'-biphenyl (54.0 mg, 0.3 mmol) and ethyl bromodifluoroacetate (181.7 mg, 0.9 mmol) according to general procedure. The crude residue was

purified by flash chromatography (PE/EA = 50:1 to 20:1) to give the product as a colorless oil (80.1 mg, 71%).

**<sup>1</sup>H NMR (400 MHz, CDCl<sub>3</sub>)** δ 7.61 – 7.55 (m, 4H), 7.45 (t, *J* = 7.5 Hz, 2H), 7.41 – 7.33 (m, 3H), 4.26 – 4.07 (m, 4H), 3.98 (dd, *J* = 8.5, 5.2 Hz, 1H), 3.20 – 3.03 (m, 1H), 2.64 – 2.48 (m, 1H), 1.31 (t, *J* = 7.2 Hz, 3H), 1.23 (t, *J* = 7.1 Hz, 3H).

**<sup>13</sup>C NMR (101 MHz, CDCl<sub>3</sub>)** δ 172.3, 163.6 (t, *J* = 32.4 Hz), 140.7, 140.4, 136.5, 128.8, 128.2, 127.5, 127.4, 127.0, 115.0 (t, *J* = 251.1 Hz), 62.9, 61.4, 44.5 (t, *J* = 4.2 Hz), 37.9 (t, *J* = 23.5 Hz), 13.9, 13.8.

**<sup>19</sup>F NMR (56 MHz, CDCl<sub>3</sub>)** δ -109.8 – -110.1 (m, 2F).

**HRMS (EI):** Calcd. for C<sub>21</sub>H<sub>22</sub>F<sub>2</sub>O<sub>4</sub> [M+H]<sup>+</sup> 377.1559, found: 377.1553.

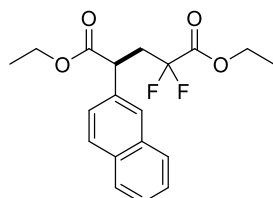

#### Diethyl 2,2-difluoro-4-(naphthalen-2-yl)pentanedioate (**3sa**)

The title compound was prepared from 2-vinylnaphthalene (46.2 mg, 0.3 mmol) and ethyl bromodifluoroacetate (181.7 mg, 0.9 mmol) according to general procedure. The crude residue was purified by flash chromatography (PE/EA = 50:1 to 20:1) to give the product as a colorless oil (79.8 mg, 76%).

**<sup>1</sup>H NMR (400 MHz, CDCl<sub>3</sub>)** δ 7.85 – 7.80 (m, 3H), 7.77 (s, 1H), 7.52 – 7.47 (m, 2H), 7.46 – 7.41 (m, 1H), 4.25 – 4.17 (m, 1H), 4.16 – 4.04 (m, 4H), 3.26 – 3.09 (m, 1H), 2.71 – 2.54 (m, 1H), 1.25 (t, *J* = 7.2 Hz, 3H), 1.20 (t, *J* = 7.1 Hz, 3H).

**<sup>13</sup>C NMR (101 MHz, CDCl<sub>3</sub>)** δ 172.3, 163.6 (t, *J* = 32.4 Hz), 134.9, 133.3, 132.7, 128.6, 127.8, 127.6, 126.8, 126.4, 126.2, 125.4, 115.0 (t, *J* = 251.1 Hz), 62.9, 61.4, 45.0 (t, *J* = 4.2 Hz), 37.9 (t, *J* = 23.5 Hz), 13.9, 13.7.

**<sup>19</sup>F NMR (56 MHz, CDCl<sub>3</sub>)** δ -109.7 – -110.0 (m, 2F).

**HRMS (EI):** Calcd. for C<sub>19</sub>H<sub>20</sub>F<sub>2</sub>O<sub>4</sub> [M+Na]<sup>+</sup> 373.1222, found: 373.1215.

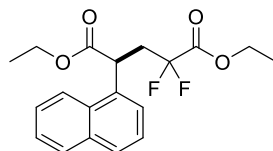

#### Diethyl 2,2-difluoro-4-(naphthalen-1-yl)pentanedioate (**3ta**)

The title compound was prepared from 1-vinylnaphthalene (46.2 mg, 0.3 mmol) and ethyl bromodifluoroacetate (181.7 mg, 0.9 mmol) according to general procedure. The crude residue was purified by flash chromatography (PE/EA = 50:1 to 20:1) to give the product as a colorless oil (31.5 mg, 30%).

**<sup>1</sup>H NMR (400 MHz, CDCl<sub>3</sub>)** δ 8.13 (d, *J* = 8.5 Hz, 1H), 7.88 (d, *J* = 8.0 Hz, 1H), 7.80 (dd, *J* = 6.2, 3.0 Hz, 1H), 7.59 (t, *J* = 7.1 Hz, 1H), 7.52 (t, *J* = 7.5 Hz, 1H), 7.47 – 7.40 (m, 2H), 4.74 (dd, *J* = 8.8, 4.1 Hz, 1H), 4.25 – 4.04 (m, 4H), 3.26 (ddd, *J* = 31.9, 16.2, 9.0 Hz, 1H), 2.57 (ddd, *J* = 32.0, 16.8, 4.2 Hz, 1H), 1.24 (t, *J* = 7.2 Hz, 3H), 1.16 (t, *J* = 7.1 Hz, 3H).

**<sup>13</sup>C NMR (101 MHz, CDCl<sub>3</sub>)** δ 172.7, 163.6 (t, *J* = 32.5 Hz), 134.1, 133.9, 130.8, 129.0, 128.4, 126.7, 125.9, 125.4, 125.2, 122.9, 115.1 (t, *J* = 251.1 Hz), 63.0, 61.5, 40.5, 37.8 (t, *J* = 23.3 Hz), 13.9, 13.7.

$^{19}\text{F}$  NMR (56 MHz,  $\text{CDCl}_3$ )  $\delta$  -110.0–-110.3 (m, 2F).

HRMS (EI): Calcd. for  $\text{C}_{19}\text{H}_{20}\text{F}_2\text{O}_4$   $[\text{M}+\text{H}]^+$  373.1222, found: 373.1214.

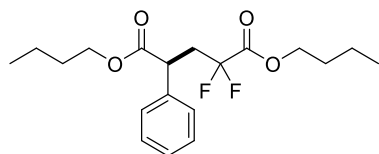

Dibutyl 2,2-difluoro-4-phenylpentanedioate (**3ab**)

The title compound was prepared from styrene (31.2 mg, 0.3 mmol) and butyl 2-bromo-2,2-difluoroacetate (207.0 mg, 0.9 mmol) according to general procedure. The crude residue was purified by flash chromatography (PE/EA= 50:1 to 20:1) to give the product as a colorless oil (72.7 mg, 68%).

$^1\text{H}$  NMR (400 MHz,  $\text{CDCl}_3$ )  $\delta$  7.35 – 7.26 (m, 5H), 4.18 – 3.99 (m, 4H), 3.90 (dd,  $J$  = 8.3, 5.3 Hz, 1H), 3.20 – 2.97 (m, 1H), 2.59 – 2.41 (m, 1H), 1.68 – 1.60 (m, 2H), 1.59 – 1.49 (m, 2H), 1.43 – 1.33 (m, 2H), 1.30 – 1.20 (m, 2H), 0.94 (t,  $J$  = 7.4 Hz, 3H), 0.85 (t,  $J$  = 7.4 Hz, 3H).

$^{13}\text{C}$  NMR (101 MHz,  $\text{CDCl}_3$ )  $\delta$  172.4, 163.7 (t,  $J$  = 32.4 Hz), 137.7, 128.8, 127.8, 115.1 (t,  $J$  = 251.1 Hz), 66.7, 65.2, 44.9 (t,  $J$  = 3.7 Hz), 37.8 (t,  $J$  = 23.4 Hz), 30.4, 30.2, 18.9, 13.6, 13.6.

$^{19}\text{F}$  NMR (56 MHz,  $\text{CDCl}_3$ )  $\delta$  -108.7–-109.0 (m, 2F).

HRMS (EI): Calcd. for  $\text{C}_{19}\text{H}_{26}\text{F}_2\text{O}_4$   $[\text{M}+\text{NH}_4]^+$  374.2137, found: 374.2142.

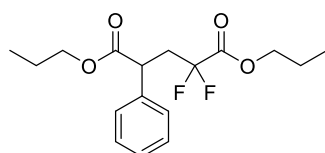

Dipropyl 2,2-difluoro-4-phenylpentanedioate (**3ac**)

The title compound was prepared from styrene (31.2 mg, 0.3 mmol) and propyl 2-bromo-2,2-difluoroacetate (194.4 mg, 0.9 mmol) according to general procedure. The crude residue was purified by flash chromatography (PE/EA = 50:1 to 20:1) to give the product as a colorless oil (52.2 mg, 53%).

$^1\text{H}$  NMR (700 MHz,  $\text{CDCl}_3$ )  $\delta$  7.33 – 7.25 (m, 5H), 4.11 – 4.07 (m, 1H), 4.07 – 4.02 (m, 2H), 4.02 – 3.92 (m, 1H), 3.94 – 3.90 (m, 1H), 3.12 – 3.02 (m, 1H), 2.56 – 2.45 (m, 1H), 1.73 – 1.65 (m, 2H), 1.62 – 1.55 (m, 2H), 0.95 (t,  $J$  = 7.5 Hz, 3H), 0.83 (t,  $J$  = 7.5 Hz, 3H).

$^{13}\text{C}$  NMR (176 MHz,  $\text{CDCl}_3$ )  $\delta$  172.4, 163.7 (t,  $J$  = 32.4 Hz), 137.6, 128.8, 127.7, 127.7, 115.0 (t,  $J$  = 251.1 Hz), 68.3, 66.9, 44.9 (t,  $J$  = 4.0 Hz), 37.8 (t,  $J$  = 23.4 Hz), 21.7, 21.6, 10.1, 10.1.

$^{19}\text{F}$  NMR (56 MHz,  $\text{CDCl}_3$ )  $\delta$  -104.3 – -105.0 (m, 2F).

HRMS (ESI-TOF)  $m/z$ :  $[\text{M}+\text{H}]^+$  Calcd. for 329.1559, found: 329.1561.

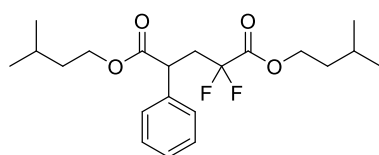

Diisopentyl 2,2-difluoro-4-phenylpentanedioate (**3ad**)

The title compound was prepared from styrene (31.2 mg, 0.3 mmol) and isopentyl 2-bromo-2,2-difluoroacetate (219.6 mg, 0.9 mmol) according to general procedure. The crude residue was purified by flash chromatography (PE/EA = 50:1 to 20:1) to give the product as a colorless oil

(93.4 mg, 81%).

**<sup>1</sup>H NMR (700 MHz, CDCl<sub>3</sub>)** δ 7.28–7.23 (m, 2H), 7.23–7.18 (m, 3H), 4.12–3.95 (m, 4H), 3.82 (dd, *J* = 8.0, 5.1 Hz, 1H), 3.04–2.92 (m, 1H), 2.47–2.42 (m, 1H), 1.64–1.54 (m, 1H), 1.53–1.34 (m, 3H), 1.40–1.34 (m, 2H), 0.85 (d, *J* = 6.6 Hz, 6H), 0.79–0.73 (m, 6H).

**<sup>13</sup>C NMR (176 MHz, CDCl<sub>3</sub>)** δ 172.4, 163.7 (*t*, *J* = 32.3 Hz), 137.6, 128.8, 127.8, 115.0 (*t*, *J* = 251.2 Hz), 65.5, 64.0, 44.9 (*t*, *J* = 3.9 Hz), 37.8 (*t*, *J* = 23.4 Hz), 37.0, 36.8, 24.9, 24.9, 22.3, 22.3, 22.3, 22.3.

**<sup>19</sup>F NMR (56 MHz, CDCl<sub>3</sub>)** δ -104.3–-105.0 (m, 2F).

**HRMS (ESI-TOF) *m/z***: [M+H]<sup>+</sup> Calcd. for 385.2185, found: 385.2181.

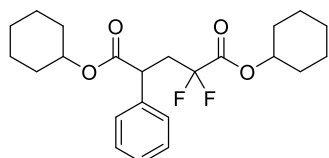

Dicyclohexyl 2,2-difluoro-4-phenylpentanedioate (with dicyclohexyl oxalate from substrate) (**3ae**)

Dicyclohexyl 2,2-difluoro-4-phenylpentanedioate: dicyclohexyl oxalate = 5:2

The title compound was prepared from styrene (31.2 mg, 0.3 mmol) and cyclohexyl 2-bromo-2,2-difluoroacetate (230.4 mg, 0.9 mmol) according to general procedure. The crude residue was purified by flash chromatography (PE/EA = 50:1 to 20:1) to give the product as a colorless oil (a mixture of dicyclohexyl 2,2-difluoro-4-phenylpentanedioate: dicyclohexyl oxalate = 5:2, 55.1 mg, the calculated yield is approximately 36%).

**<sup>1</sup>H NMR (700 MHz, CDCl<sub>3</sub>)** δ 7.27–7.22 (m, 4H), 7.21–7.18 (m, 1H), 4.87–4.82 (m, 1H), 4.75–4.70 (m, 1H), 4.70–4.65 (m, 1H), 3.82 (dd, *J* = 8.8, 4.8 Hz, 1H), 3.04–2.94 (m, 1H), 2.43–2.34 (m, 1H), 1.87–1.84 (m, 1H), 1.81–1.77 (m, 1H), 1.77–1.72 (m, 2H), 1.72–1.68 (m, 2H), 1.68–1.63 (m, 2H), 1.62–1.56 (m, 2H), 1.52–1.44 (m, 5H), 1.43–1.36 (m, 3H), 1.35–1.25 (m, 5H), 1.25–1.15 (m, 5H).

**<sup>13</sup>C NMR (176 MHz, CDCl<sub>3</sub>)** δ 171.8, 163.1 (*t*, *J* = 32.2 Hz), 157.8, 138.0, 128.8, 127.7, 127.6, 115.1 (*t*, *J* = 251.3 Hz), 75.9, 75.9, 73.4, 45.1 (*t*, *J* = 3.6 Hz), 37.8 (*t*, *J* = 23.2 Hz), 31.2, 31.2, 31.0, 31.0, 25.3, 25.1, 25.1, 23.6, 23.4, 23.4, 23.3.

**<sup>19</sup>F NMR (56 MHz, CDCl<sub>3</sub>)** δ -104.5–-105.3 (m, 2F).

**HRMS (ESI-TOF) *m/z***: [M+H]<sup>+</sup> Calcd. for 409.2185, found: 409.2185.

Dicyclohexyl oxalate: **HRMS (ESI-TOF) *m/z***: [M+NH<sub>4</sub>]<sup>+</sup> Calcd. for 272.1856, found: 272.1855.

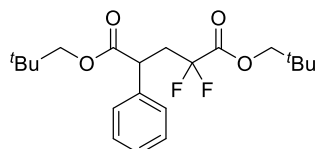

Dineopentyl 2,2-difluoro-4-phenylpentanedioate (**3af**)

The title compound was prepared from styrene (31.2 mg, 0.3 mmol) and 3-phenylpropyl 2-bromo-2,2-difluoroacetate (219.6 mg, 0.9 mmol) according to general procedure. The crude residue was purified by flash chromatography (PE/EA = 50:1 to 20:1) to give the product as a colorless oil (57.6 mg, 50%).

**<sup>1</sup>H NMR (700 MHz, CDCl<sub>3</sub>)** δ 7.35–7.28 (m, 4H), 7.28–7.24 (m, 1H), 3.98–3.94 (m, 1H), 3.85 (d, *J* = 10.4 Hz, 1H), 3.79 (*t*, *J* = 10.6 Hz, 2H), 3.72 (d, *J* = 10.5 Hz, 1H), 3.16–3.05 (m, 1H), 2.57–2.49 (m, 1H), 0.95 (s, 9H), 0.82 (s, 9H).

$^{13}\text{C}$  NMR (176 MHz,  $\text{CDCl}_3$ )  $\delta$  172.3, 163.7 (t,  $J = 32.4$  Hz), 137.7, 128.8, 127.8, 127.7, 115.1 (t,  $J = 251.2$  Hz), 75.7, 74.4, 45.0 (d,  $J = 3.9$  Hz), 37.6 (t,  $J = 23.3$  Hz), 31.4, 31.4, 26.2, 26.2.

$^{19}\text{F}$  NMR (56 MHz,  $\text{CDCl}_3$ )  $\delta$  -104.1 – -104.9 (m, 2F).

HRMS (ESI-TOF)  $m/z$ :  $[\text{M}+\text{H}]^+$  Calcd. for 385.2185, found: 385.2185.

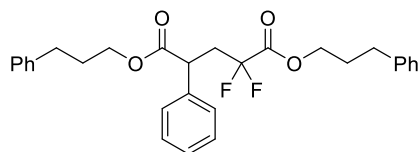

#### Bis(3-phenylpropyl) 2,2-difluoro-4-phenylpentanedioate (**3ag**)

The title compound was prepared from styrene (31.2 mg, 0.3 mmol) and 3-phenylpropyl 2-bromo-2,2-difluoroacetate (262.8 mg, 0.9 mmol) according to general procedure. The crude residue was purified by flash chromatography (PE/EA = 50:1 to 20:1) to give the product as a colorless oil (60.5 mg, 42%).

$^1\text{H}$  NMR (700 MHz,  $\text{CDCl}_3$ )  $\delta$  7.34–7.29 (m, 4H), 7.27 (t,  $J = 7.2$  Hz, 3H), 7.23–7.18 (m, 3H), 7.14 (t,  $J = 7.2$  Hz, 3H), 7.01 (d,  $J = 7.5$  Hz, 2H), 4.15–4.10 (m, 1H), 4.09–4.01 (m, 3H), 3.96–3.91 (m, 1H), 3.14–3.03 (m, 1H), 2.66 (t,  $J = 7.6$  Hz, 2H), 2.56–2.45 (m, 3H), 2.00–1.94 (m, 2H), 1.89–1.81 (m, 2H).

$^{13}\text{C}$  NMR (176 MHz,  $\text{CDCl}_3$ )  $\delta$  172.3, 163.6 (t,  $J = 32.5$  Hz), 140.9, 140.5, 137.5, 128.9, 128.5, 128.3, 128.3, 128.3, 127.8, 127.8, 126.1, 125.9, 115.0 (t,  $J = 251.2$  Hz), 66.0, 64.4, 44.9 (t,  $J = 3.9$  Hz), 37.7 (t,  $J = 23.4$  Hz), 31.7, 31.7, 30.0, 29.6.

$^{19}\text{F}$  NMR (56 MHz,  $\text{CDCl}_3$ )  $\delta$  -104.1 – -104.8 (m, 2F).

HRMS (ESI-TOF)  $m/z$ :  $[\text{M}+\text{H}]^+$  Calcd. for 481.2185, found: 481.2180.

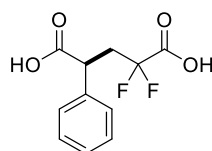

#### 2,2-Difluoro-4-phenylpentanedioic acid (**4**)

White solid (67.3 mg, 92%).

$^1\text{H}$  NMR (400 MHz, DMSO)  $\delta$  12.62 (br, 2H), 7.47 – 7.20 (m, 5H), 3.78 (dd,  $J = 8.1, 4.8$  Hz, 1H), 3.10 – 2.91 (m, 1H), 2.47 – 2.30 (m, 1H).

$^{13}\text{C}$  NMR (101 MHz, DMSO)  $\delta$  173.4, 164.8 (t,  $J = 31.4$  Hz), 138.6, 128.7, 127.7, 127.5, 115.6 (t,  $J = 249.5$  Hz), 44.5, 37.0 (t,  $J = 23.0$  Hz).

$^{19}\text{F}$  NMR (56 MHz, DMSO)  $\delta$  -109.7 – -110.6 (m, 2F).

HRMS (EI): Calcd. for  $\text{C}_{11}\text{H}_{10}\text{F}_2\text{O}_4$   $[\text{M}+\text{Na}]^+$  267.0439, found: 267.0429.

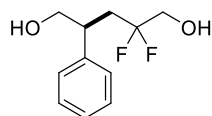

#### 3,3-Difluoro-5-phenyltetrahydro-2H-pyran (**5**)

Colorless oil (127.0 mg, 98%).

**<sup>1</sup>H NMR (700 MHz, CDCl<sub>3</sub>)** δ 7.30 (t, *J* = 7.5 Hz, 2H), 7.24 – 7.21 (m, 1H), 7.19 (d, *J* = 7.7 Hz, 2H), 3.67 (d, *J* = 3.4 Hz, 2H), 3.57 (dd, *J* = 12.6 Hz, 1H), 3.47 (dd, *J* = 25.3, 12.6 Hz, 1H), 3.11 – 3.05 (m, 1H), 2.44 – 2.35 (m, 1H) 2.27 – 2.17 (m, 1H).

**<sup>13</sup>C NMR (176 MHz, CDCl<sub>3</sub>)** δ 141.6, 128.7, 127.7, 127.0, 123.1 (t, *J* = 243.0 Hz), 66.9, 63.8 (t, *J* = 31.9 Hz), 42.0, 35.3 (t, *J* = 23.7 Hz).

**<sup>19</sup>F NMR (56 MHz, CDCl<sub>3</sub>)** δ -109.91 (t, *J* = 17.2 Hz, 2F).

**HRMS (EI):** Calcd. for C<sub>11</sub>H<sub>14</sub>F<sub>2</sub>O<sub>2</sub> [M+NH<sub>4</sub>]<sup>+</sup> 234.1300, found: 234.1303.

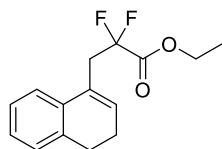

Ethyl 3-(3,4-dihydronaphthalen-1-yl)-2,2-difluoropropanoate (**8**)

The title compound was prepared from (1-cyclopropylvinyl)benzene (43.2 mg, 0.3 mmol) and ethyl bromodifluoroacetate (181.7 mg, 0.9 mmol) according to general procedure. The crude residue was purified by flash chromatography (PE/EA = 50:1 to 30:1) to give the product as a colorless oil (43.9 mg, 55%).

**<sup>1</sup>H NMR (700 MHz, CDCl<sub>3</sub>)** δ 7.16 (d, *J* = 5.4 Hz, 1H), 7.11 (t, *J* = 7.3 Hz, 1H), 7.08 – 7.03 (m, 2H), 6.00 (t, *J* = 4.4 Hz, 1H), 4.05 (q, *J* = 7.1 Hz, 2H), 3.16 (t, *J* = 15.9 Hz, 2H), 2.66 (t, *J* = 8.0 Hz, 2H), 2.21 – 2.17 (m, 2H), 1.15 – 1.10 (m, 3H).

**<sup>13</sup>C NMR (176 MHz, CDCl<sub>3</sub>)** δ 164.1 (t, *J* = 32.6 Hz), 136.3, 133.8, 131.6, 127.6, 127.3 (t, *J* = 4.3 Hz), 127.1, 126.3, 122.8, 115.5 (t, *J* = 252.3 Hz), 62.7, 37.3 (t, *J* = 24.2 Hz), 28.0, 23.2, 13.7.

**<sup>19</sup>F NMR (56 MHz, CDCl<sub>3</sub>)** δ -102.8 (t, *J* = 15.9 Hz).

**HRMS (ESI-TOF) m/z:** [M+H]<sup>+</sup> Calcd. for 267.1191, found: 267.1192.

## 8. References

- 1) M. C. Hsu, A. J. Junia, A. R. Haight, W. Zhang, *J. Org. Chem.* **2004**, *69*, 3907-3911.
- 2) T. L. Andersen, M. W. Frederiksen, K. Domino, T. Skrydstrup, *Angew. Chem. Int. Ed.* **2016**, *128*, 10396-10400.
- 3) M. Zhang, J.-H. Lin, C.-M. Jin, J.-C. Xiao, *Chem. Commun.* **2021**, *57*, 2649-2652.
- 4) D. Kurandina, M. Parasram, V. Gevorgyan, *Angew. Chem. Int. Ed.* **2017**, *56*, 14212-14216.

## 9. Copy of $^1\text{H}$ and $^{13}\text{C}$ NMR Spectra of Substrates and Products

### 9.1 Substrates

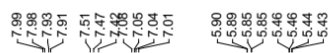

$^1\text{H}$  NMR 400 MHz,  $\text{CDCl}_3$

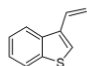

1p

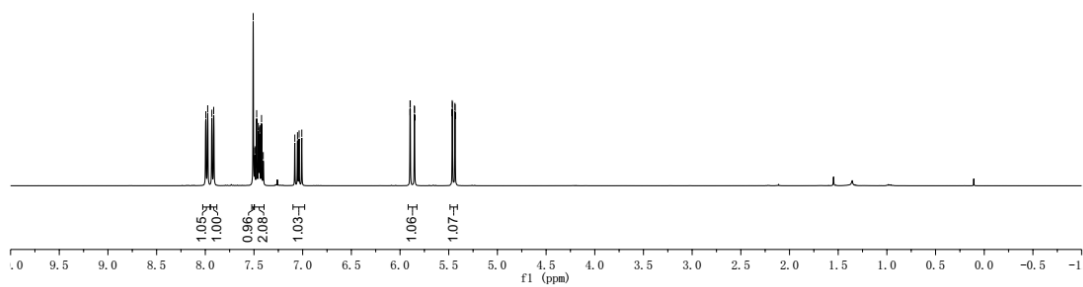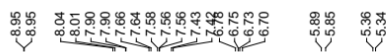

$^1\text{H}$  NMR 400 MHz,  $\text{CDCl}_3$

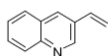

1q

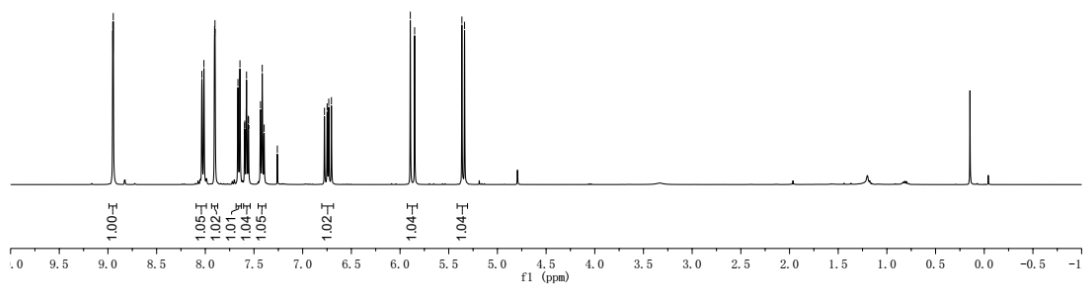



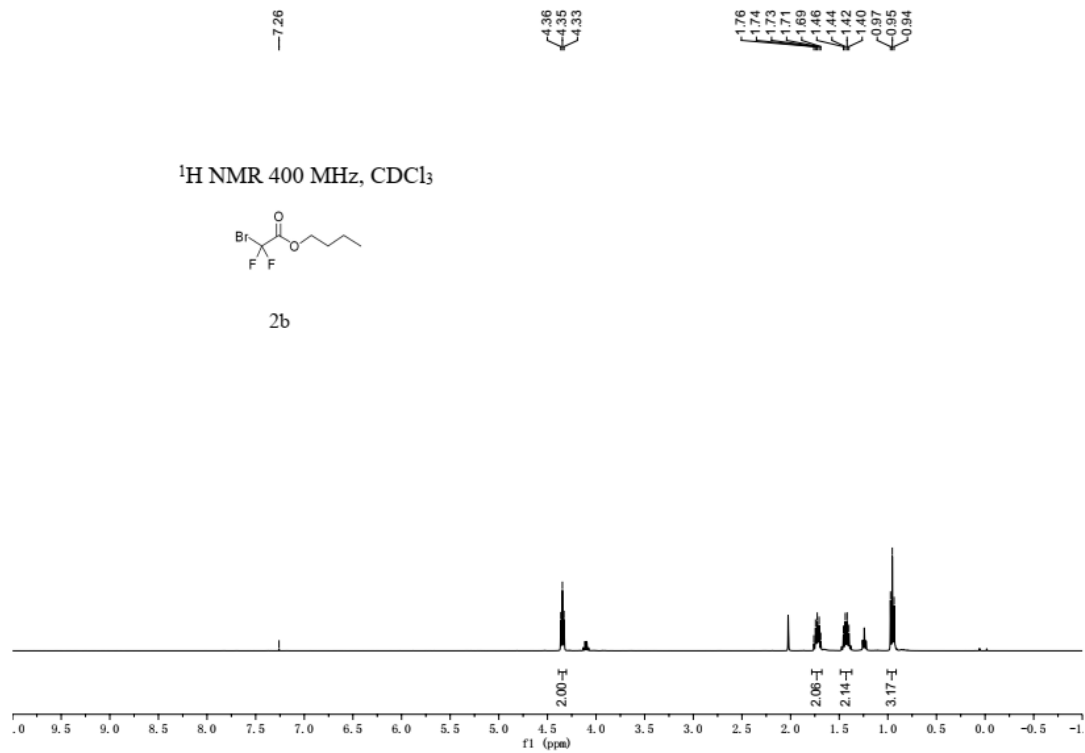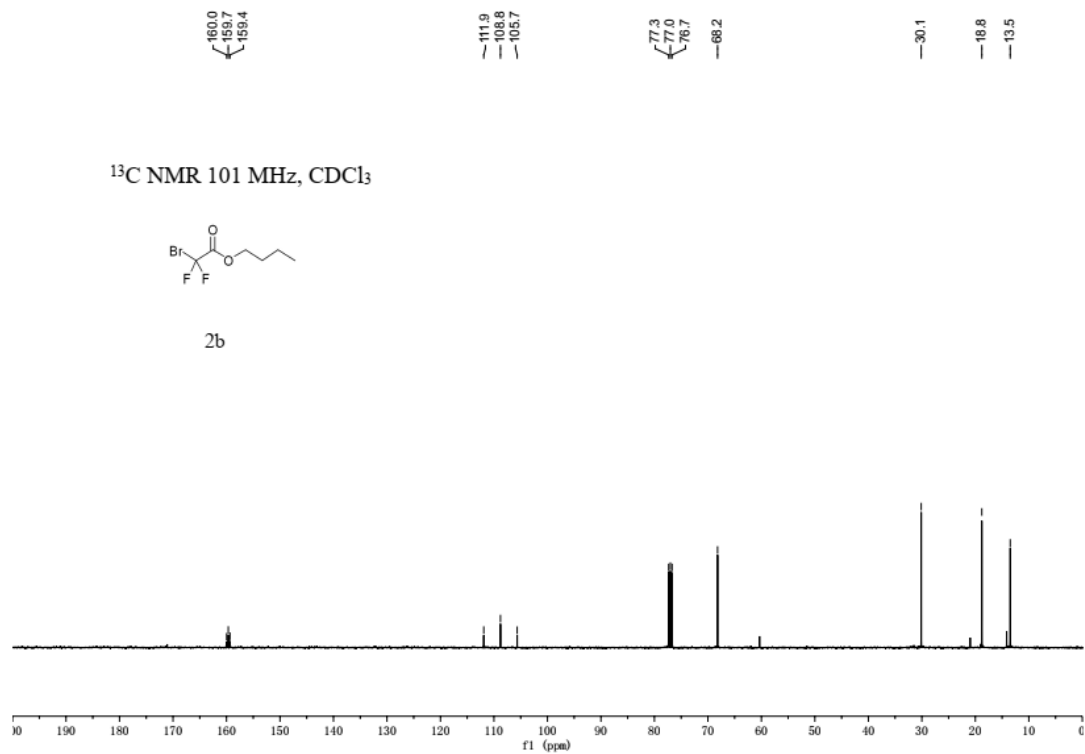

7.41  
7.40  
7.36  
7.35  
7.34  
7.32  
7.31  
7.30  
7.26

5.18  
5.17  
5.16  
4.13  
4.12  
4.12  
4.11  
4.11  
4.10  
4.10  
4.09

3.20  
3.19  
3.18  
3.17  
3.16  
3.15  
3.14  
3.13  
3.12  
3.11  
3.10  
3.09  
1.28  
1.27

$^1\text{H}$  NMR 400 MHz,  $\text{CDCl}_3$

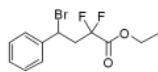

6

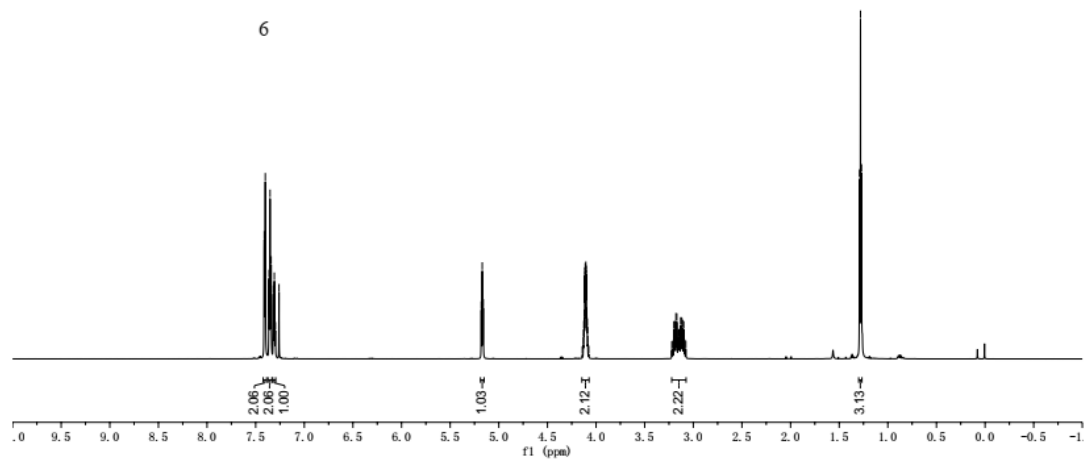

## 9.2 Products.

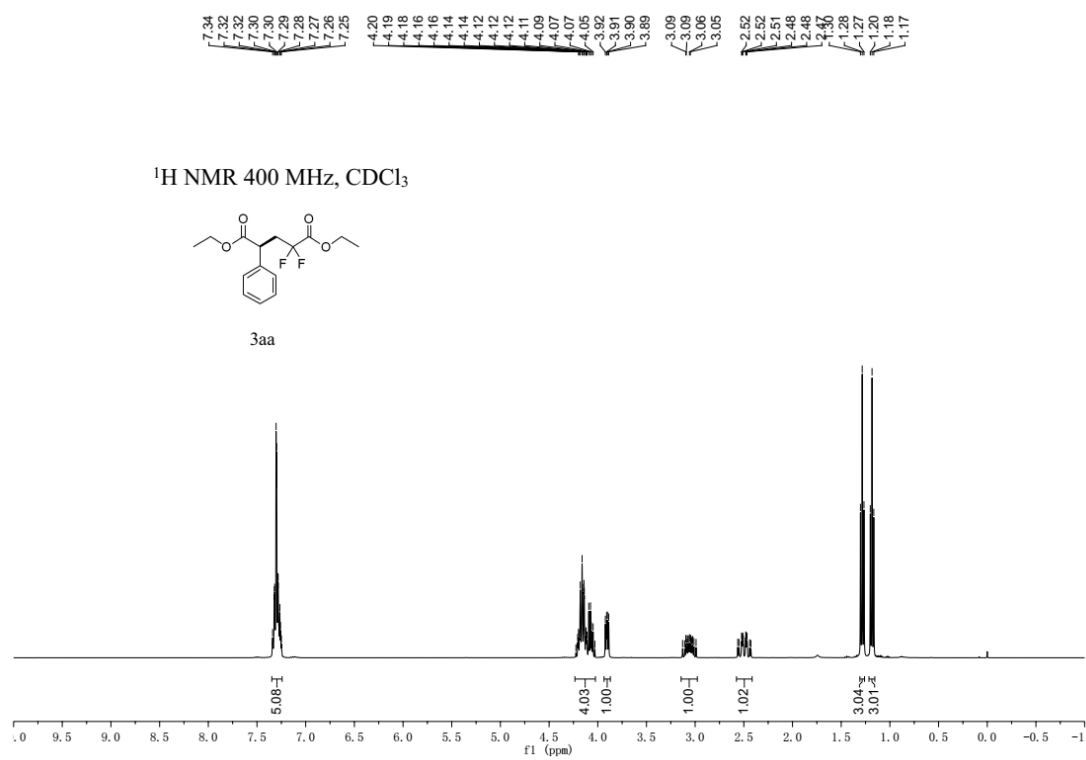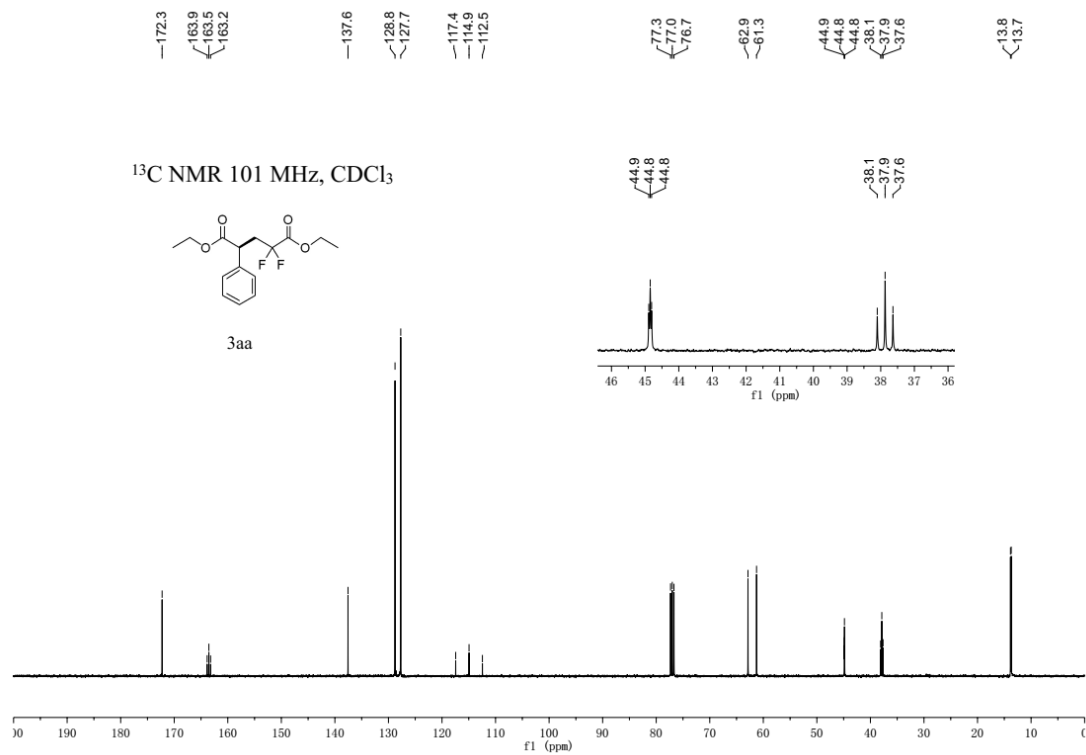

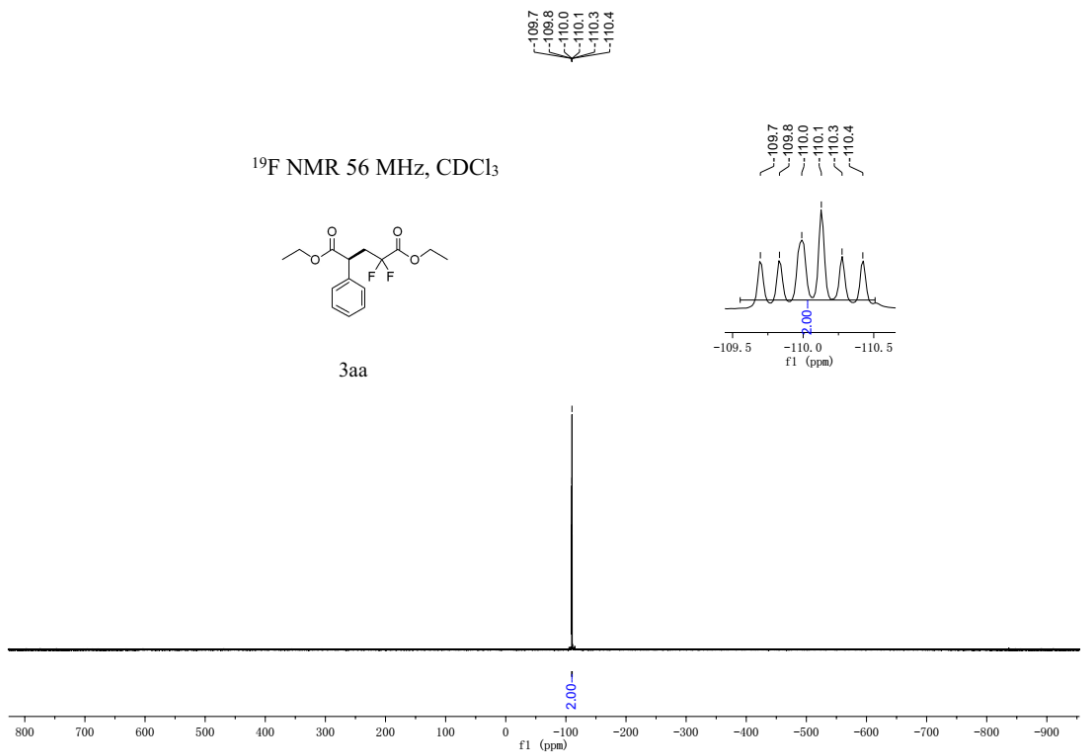

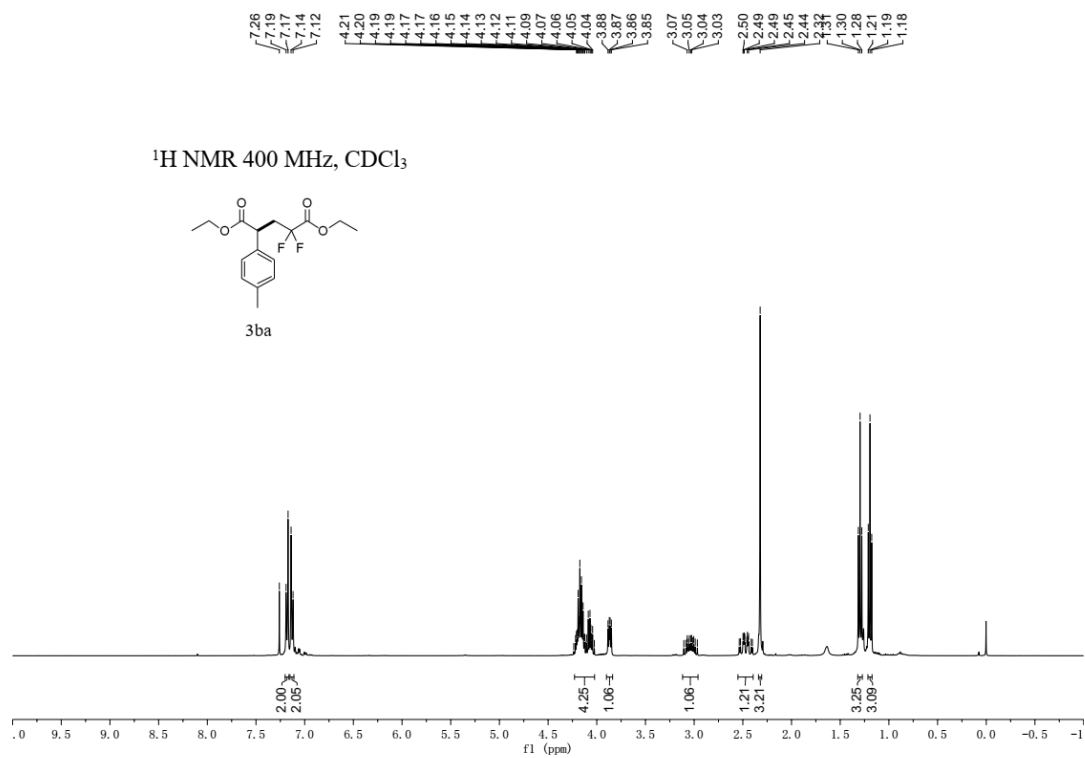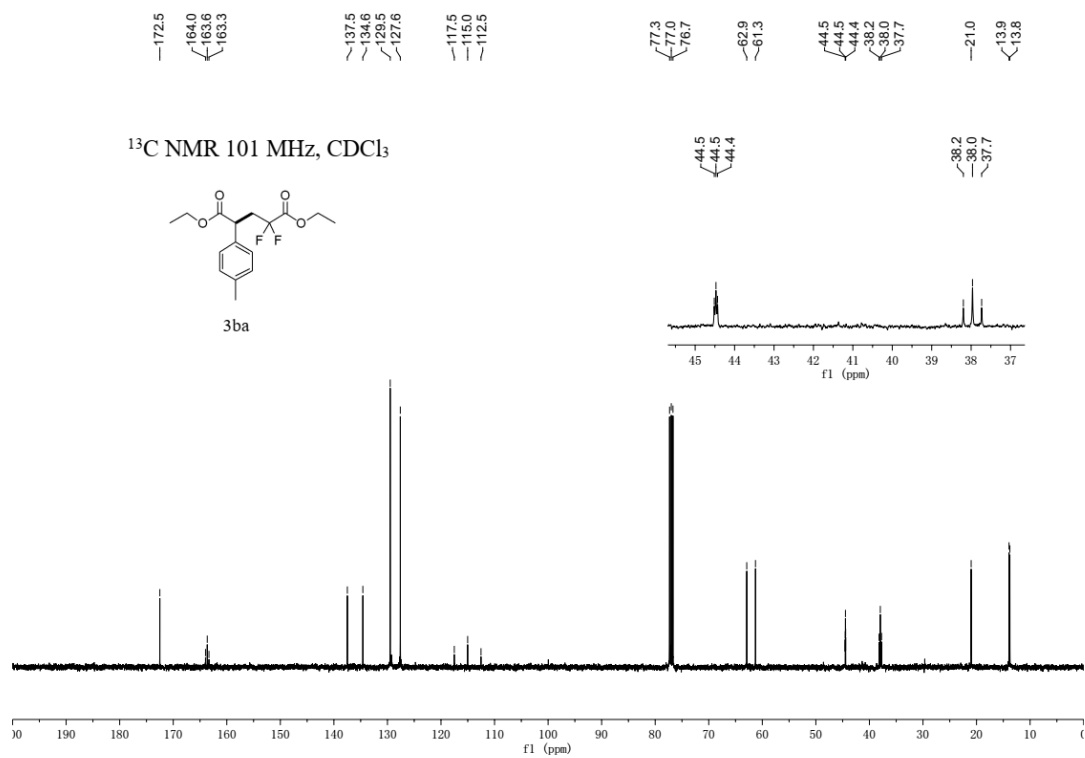

$^{19}\text{F}$  NMR 56 MHz,  $\text{CDCl}_3$

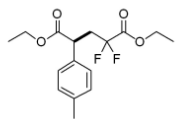

3ba

-109.8  
-109.9  
-110.0  
-110.2  
-110.3  
-110.5

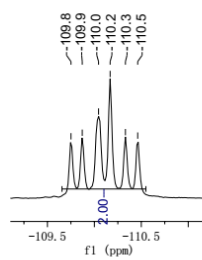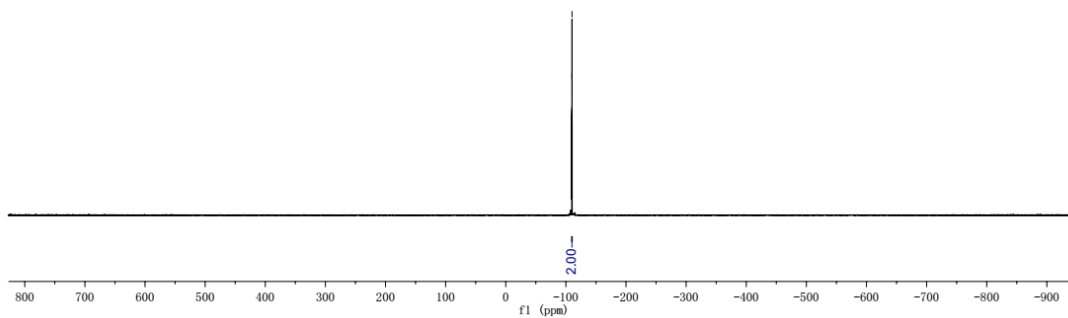

7.26  
7.24  
7.23  
7.22  
7.17  
7.16  
7.15  
4.20  
4.18  
4.17  
4.16  
4.16  
4.14  
4.12  
4.11  
4.10  
4.09  
4.07  
4.06  
4.05  
4.04  
4.03  
3.10  
3.08  
3.07  
3.06  
3.04  
2.50  
2.45  
2.44  
2.42  
2.37  
2.37  
1.39  
1.29  
1.27  
1.20  
1.18  
1.17

$^1\text{H}$  NMR 400 MHz,  $\text{CDCl}_3$

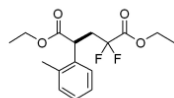

3ca

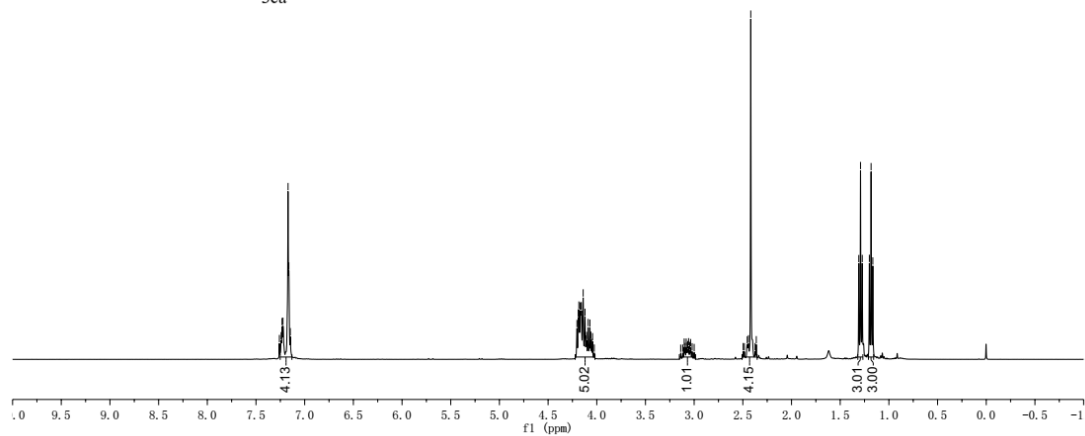

172.7  
164.0  
163.7  
163.4  
136.2  
130.8  
127.6  
126.7  
126.5  
117.6  
115.1  
112.6  
77.4  
77.0  
76.7  
63.0  
61.3  
40.3  
40.3  
40.2  
37.8  
37.4  
19.6  
14.0  
13.8

$^{13}\text{C}$  NMR 101 MHz,  $\text{CDCl}_3$

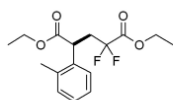

3ca

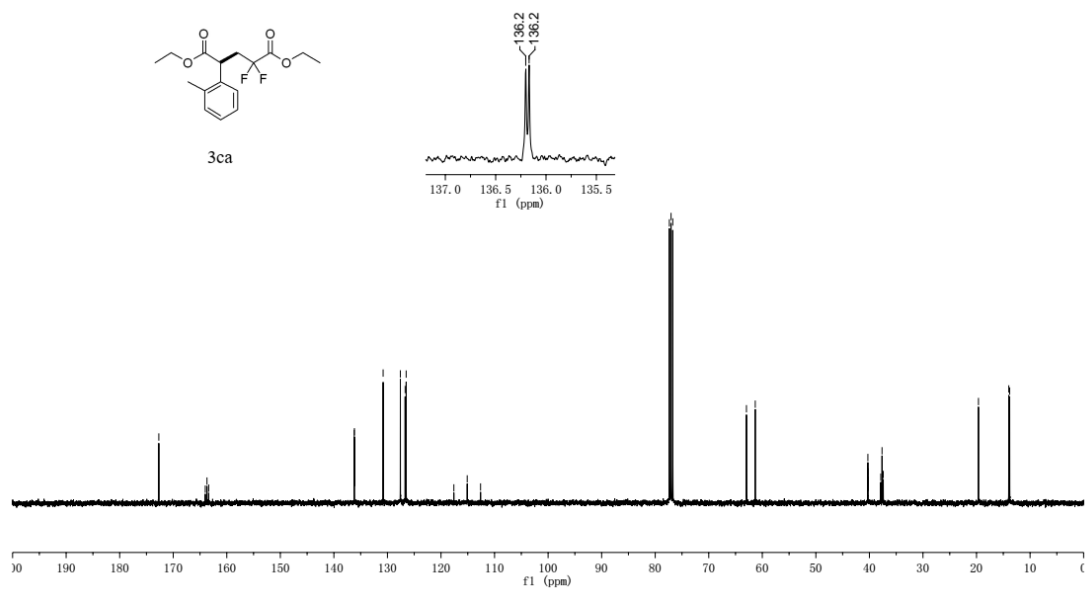

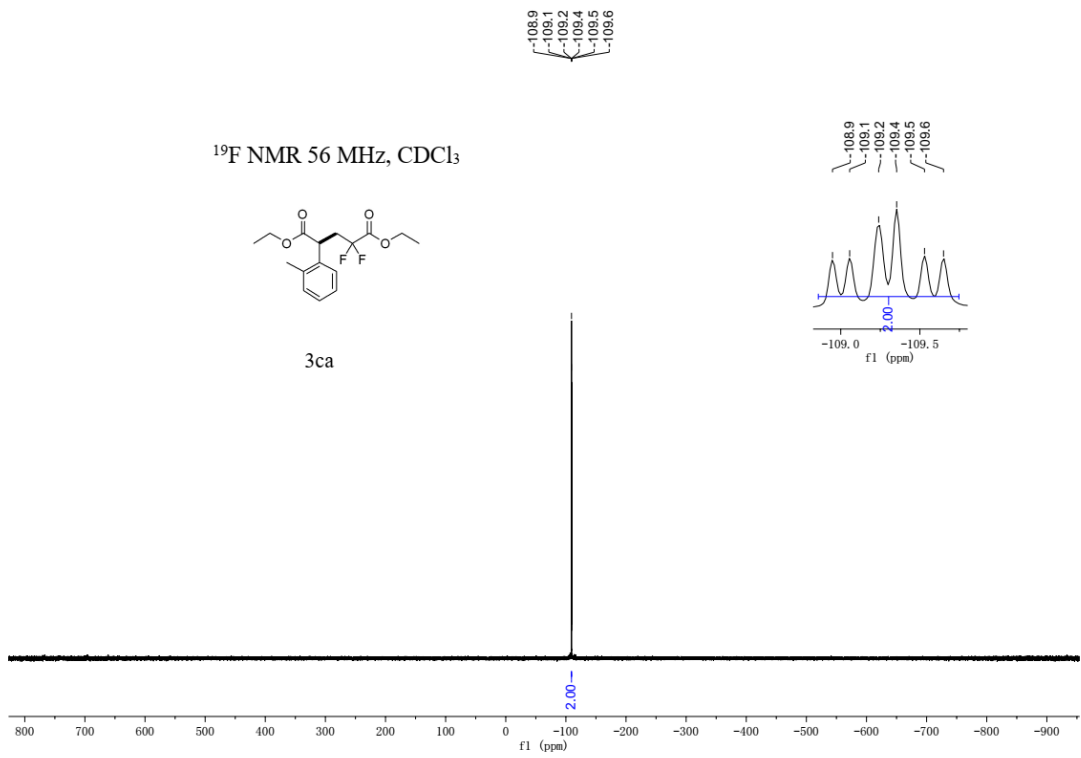



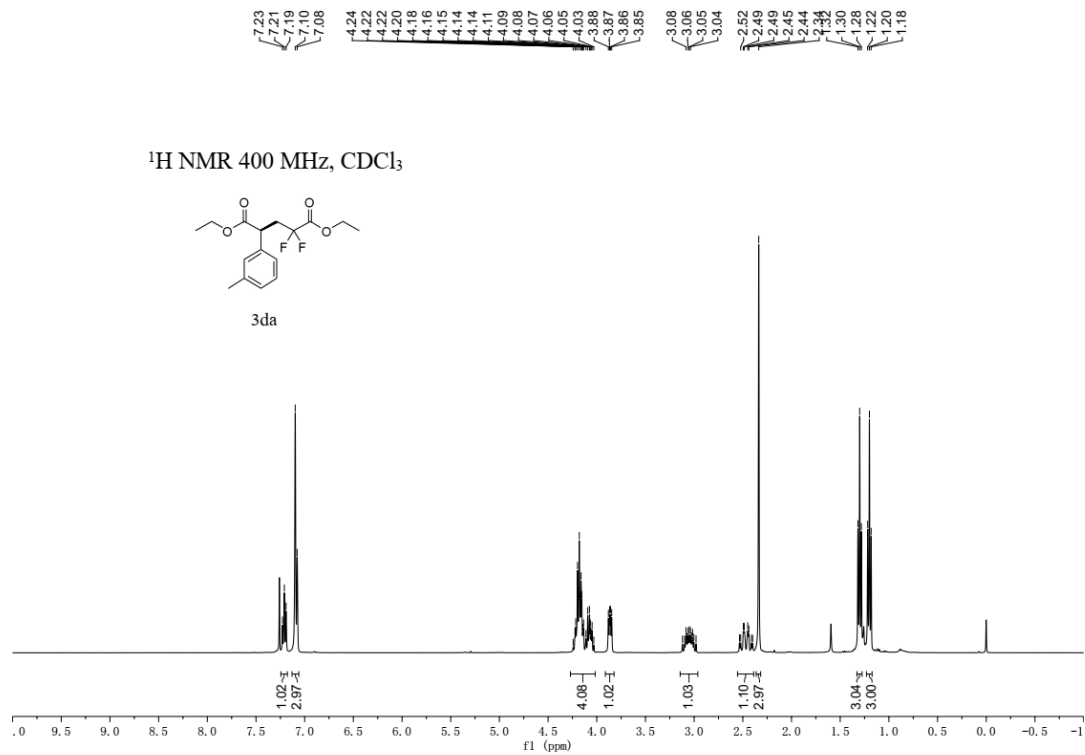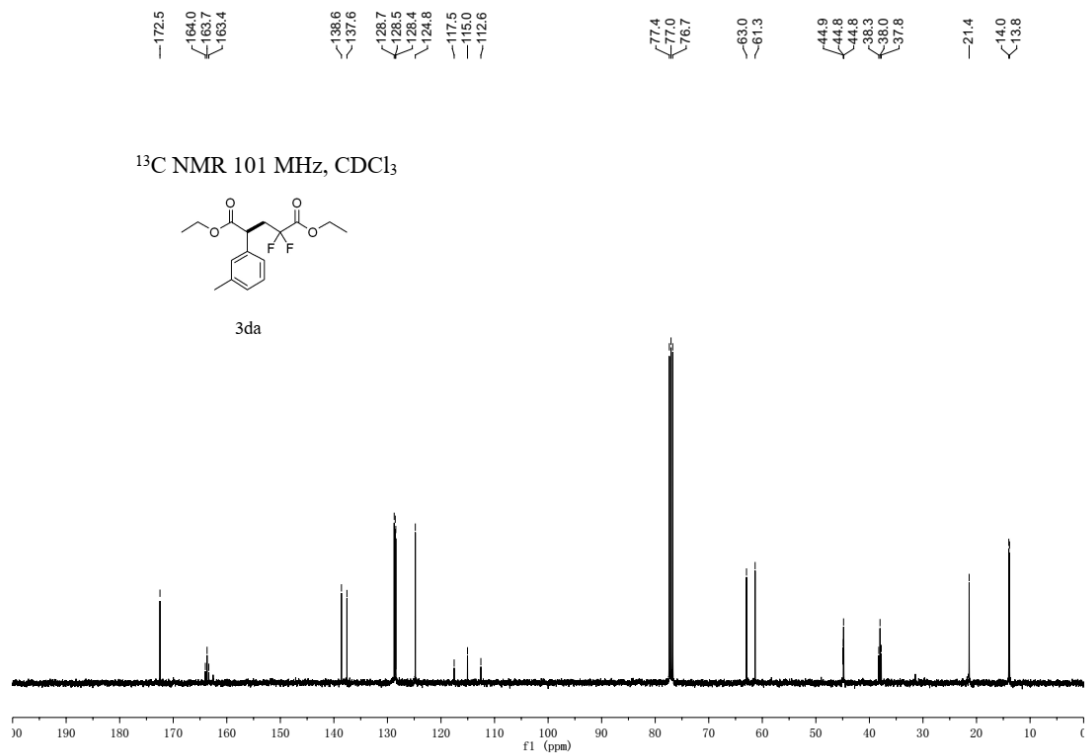

$^{19}\text{F}$  NMR 56 MHz,  $\text{CDCl}_3$

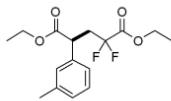

3da

-109.5  
-109.6  
-109.8  
-109.9  
-110.1  
-110.2

-109.5  
-109.6  
-109.8  
-109.9  
-110.1  
-110.2

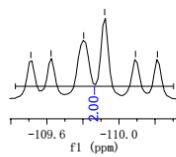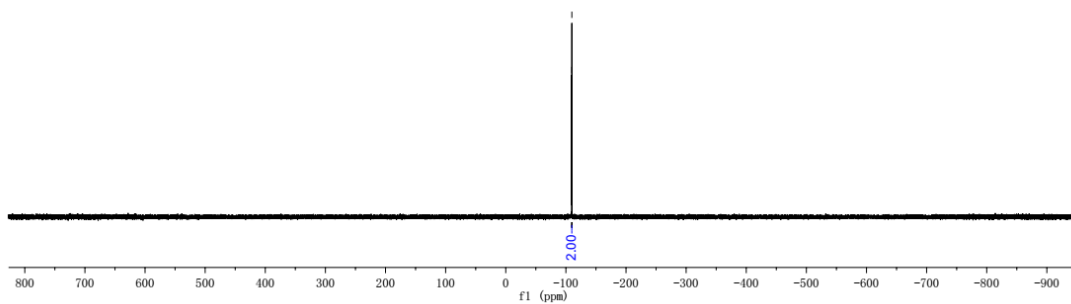

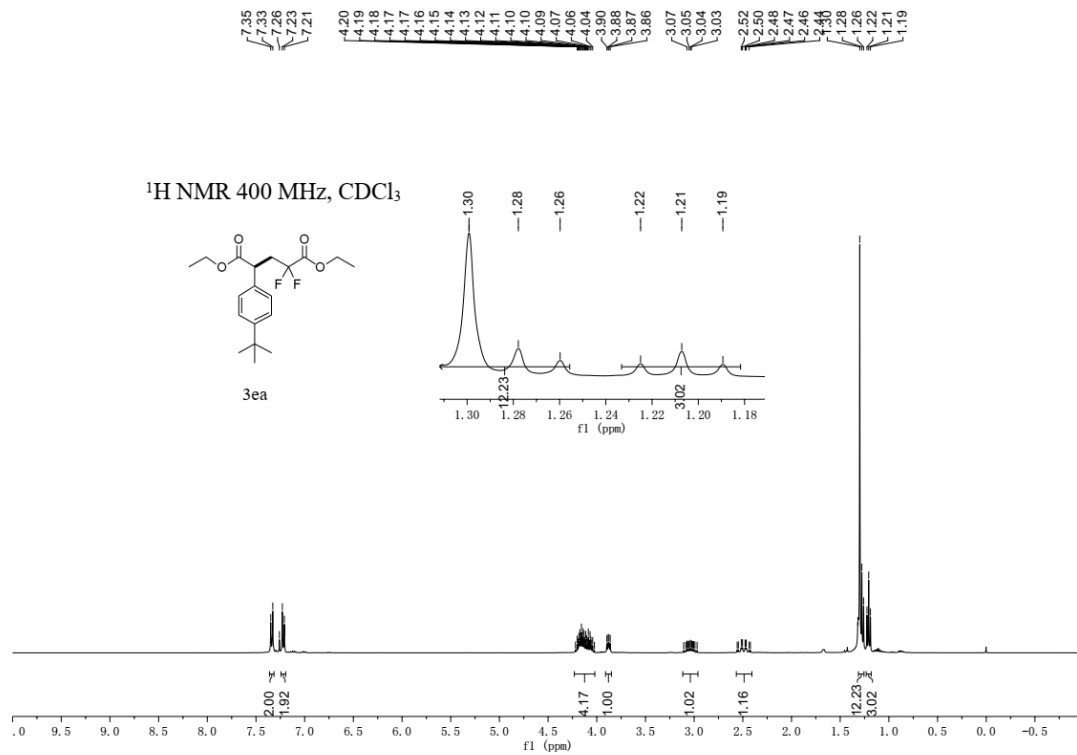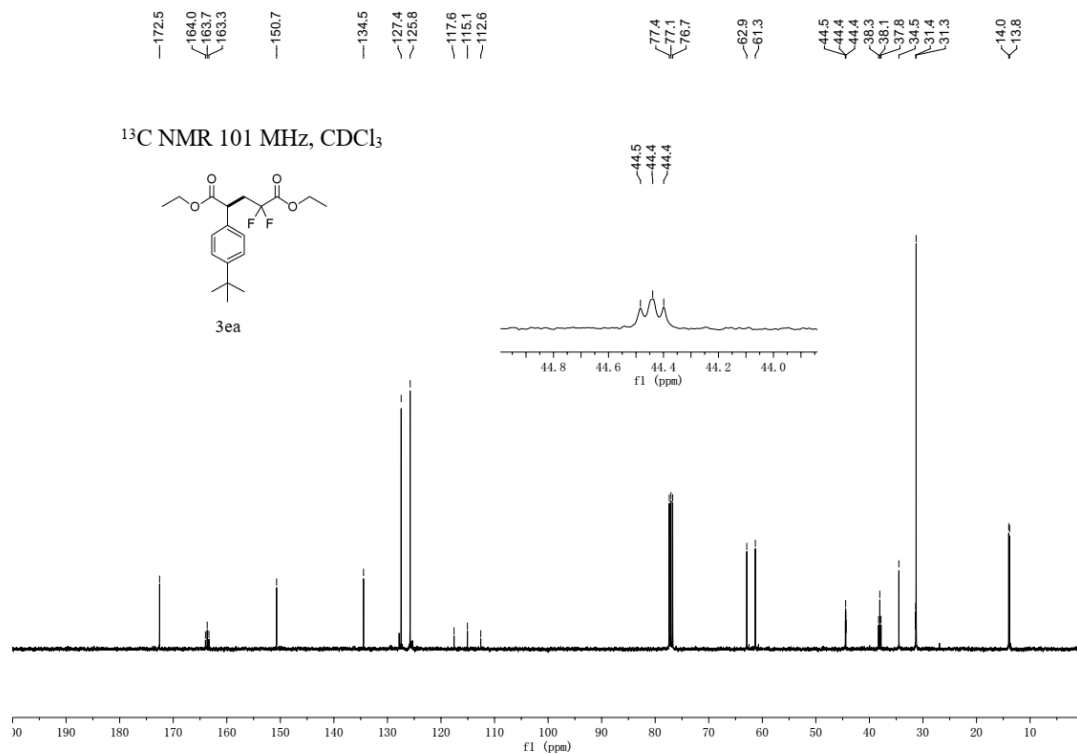

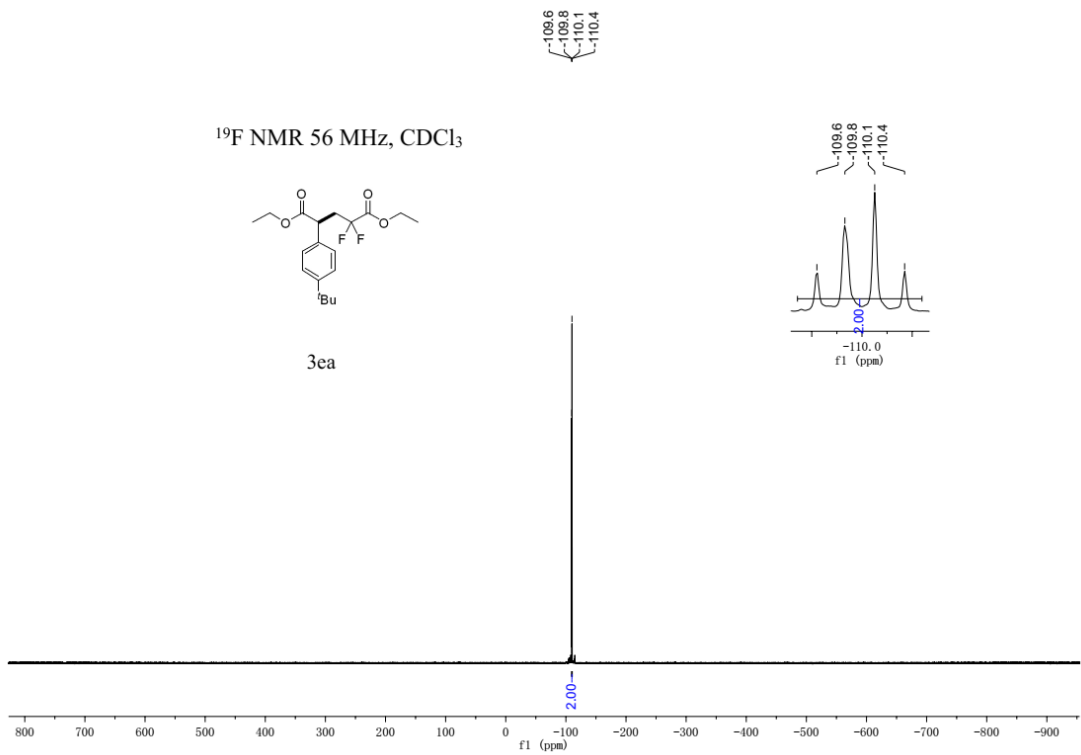

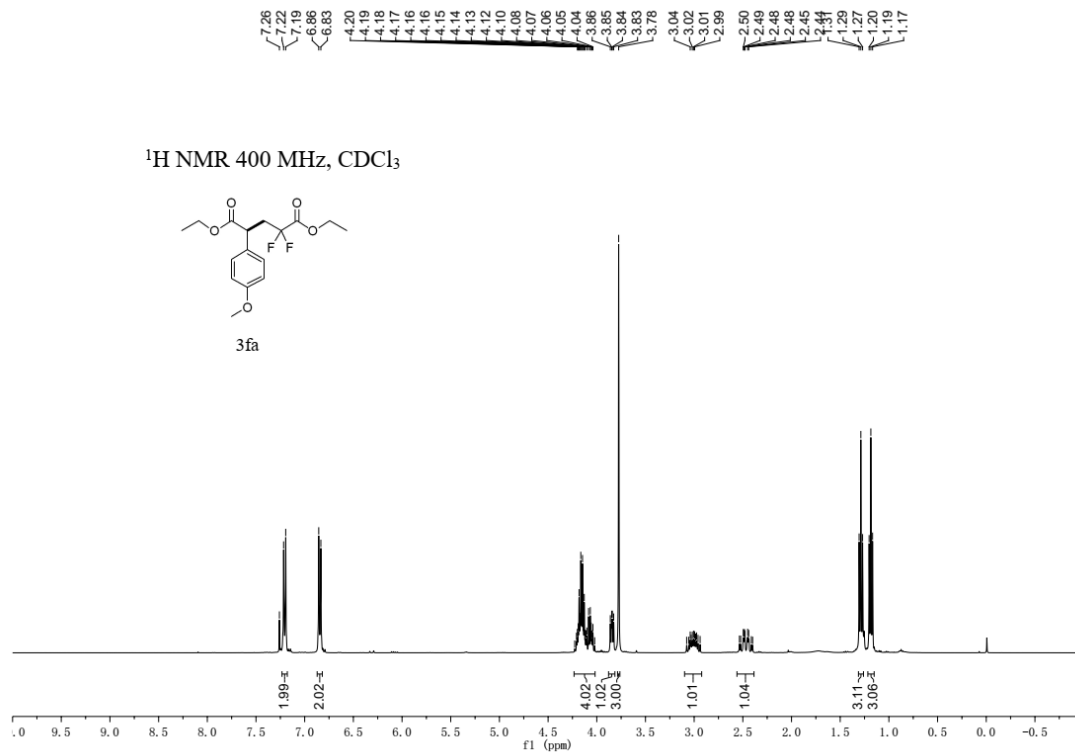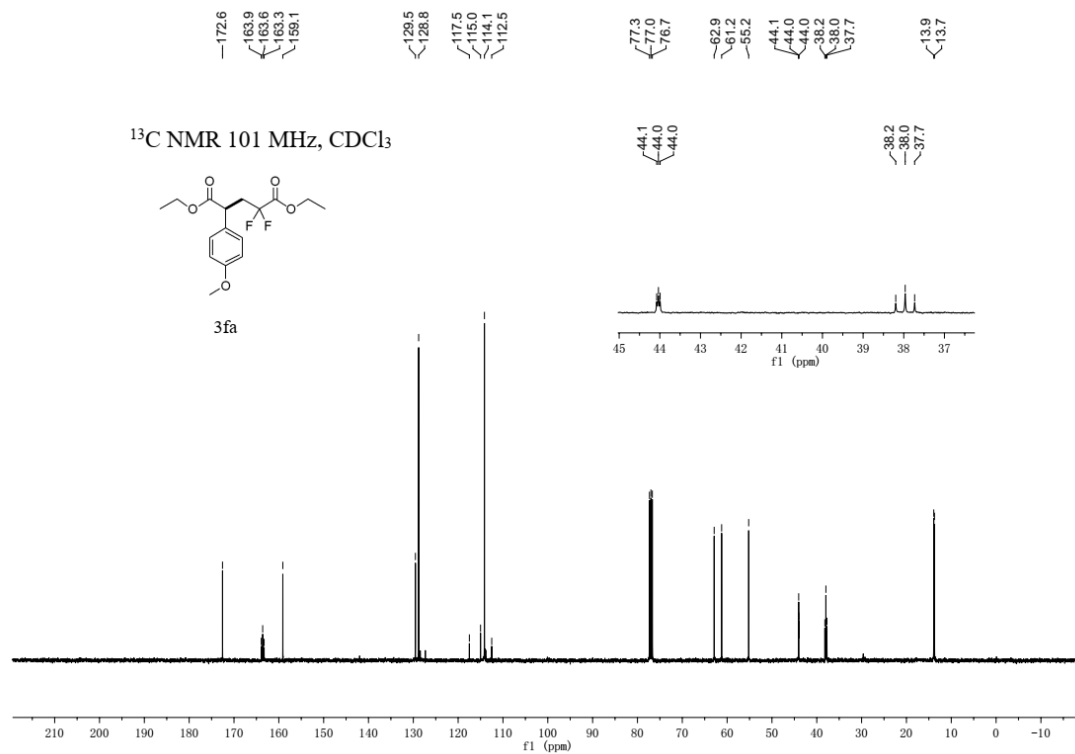

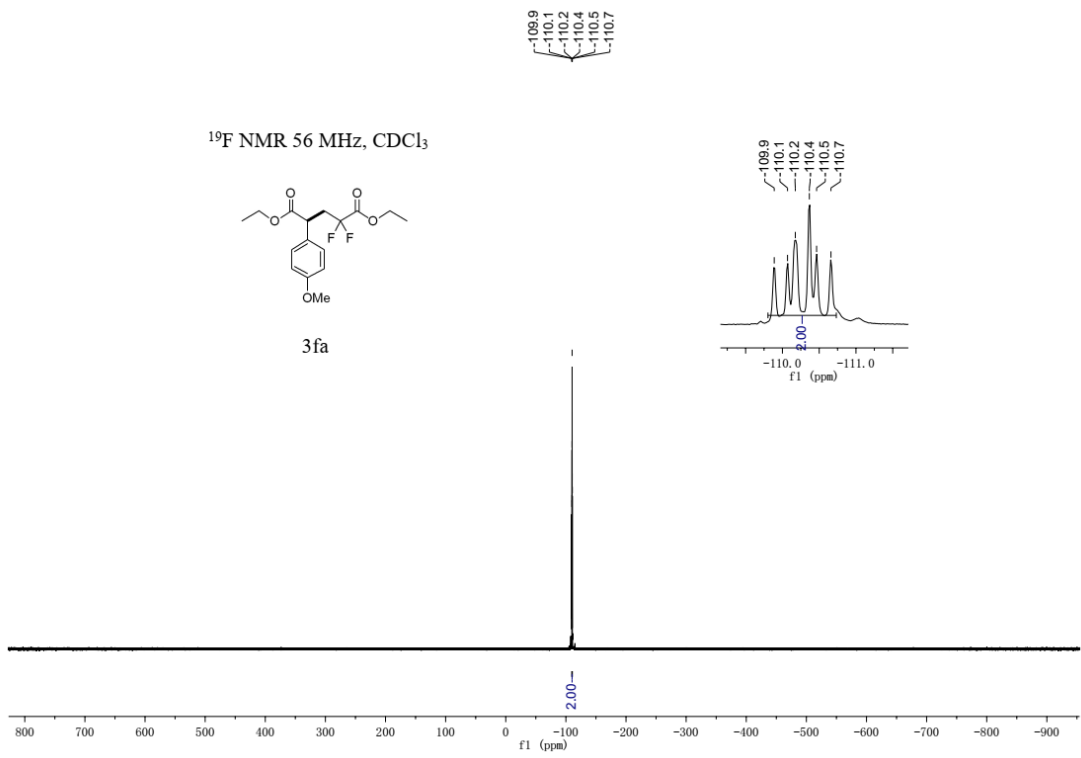

7.35  
7.33  
7.31  
7.26  
7.24  
7.13  
7.11  
7.09  
6.99  
6.96  
6.94  
4.25  
4.24  
4.22  
4.21  
4.19  
4.18  
4.17  
4.17  
4.16  
4.14  
4.13  
4.11  
4.09  
4.08  
4.07  
3.91  
3.80  
3.88  
3.88  
3.05  
3.04  
3.03  
3.01  
2.52  
2.51  
2.50  
2.47  
2.46  
2.41  
2.35  
1.31  
1.29  
1.23  
1.21  
1.19

<sup>1</sup>H NMR 400 MHz, CDCl<sub>3</sub>

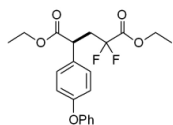

3ga

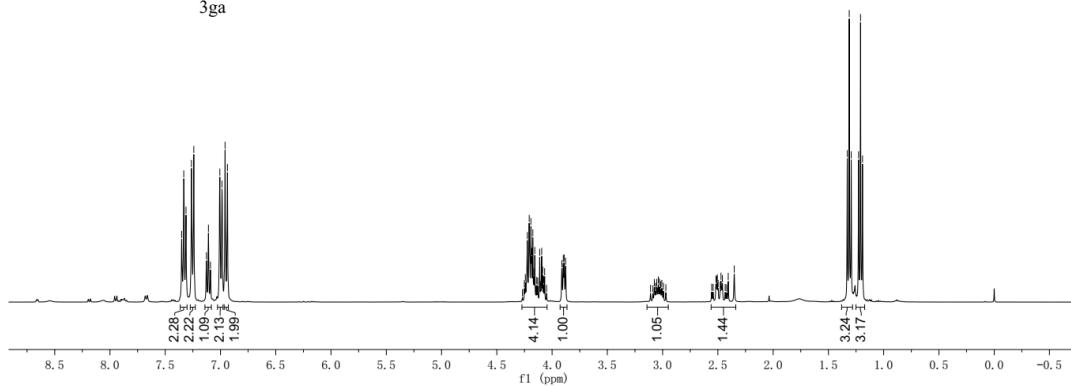

172.4  
163.9  
163.6  
163.2  
157.0  
156.7  
132.1  
129.7  
129.1  
123.5  
119.1  
118.8  
117.4  
114.9  
112.4  
77.3  
77.0  
76.7  
62.9  
61.3  
44.2  
44.1  
38.2  
35.0  
37.7  
13.9  
13.8

<sup>13</sup>C NMR 101 MHz, CDCl<sub>3</sub>

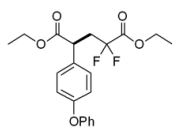

3ga

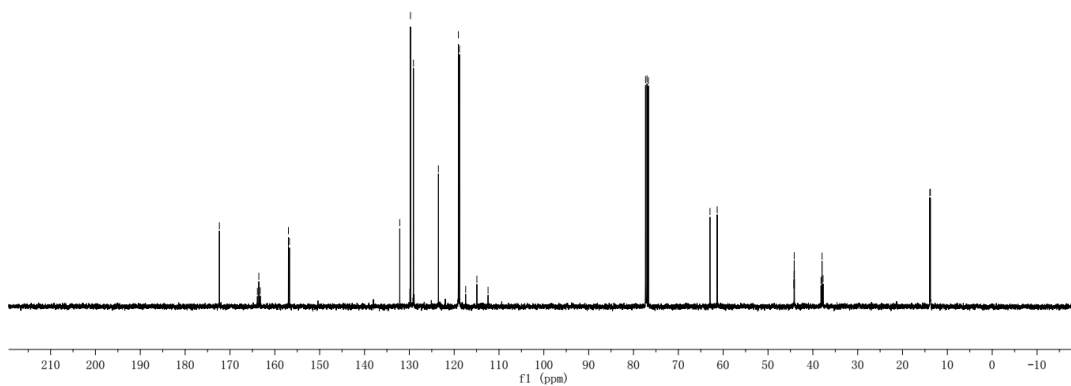

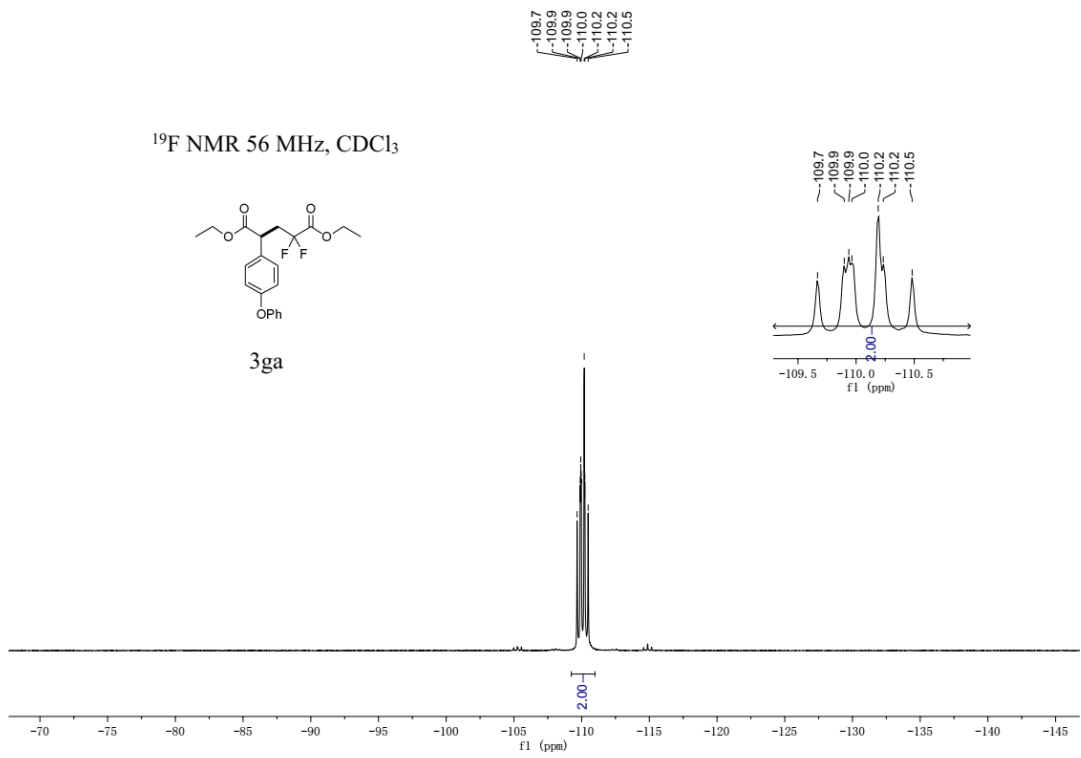



7.26  
6.83  
6.80  
6.79  
6.77  
4.22  
4.20  
4.19  
4.18  
4.16  
4.14  
4.13  
4.12  
4.11  
4.10  
4.08  
4.06  
4.05  
4.04  
4.03  
3.82  
3.83  
3.03  
3.01  
3.00  
2.98  
2.51  
2.48  
2.48  
2.47  
2.44  
1.27  
1.25  
1.20  
1.18  
1.16

<sup>1</sup>H NMR 400 MHz, CDCl<sub>3</sub>

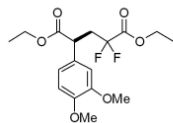

3ha

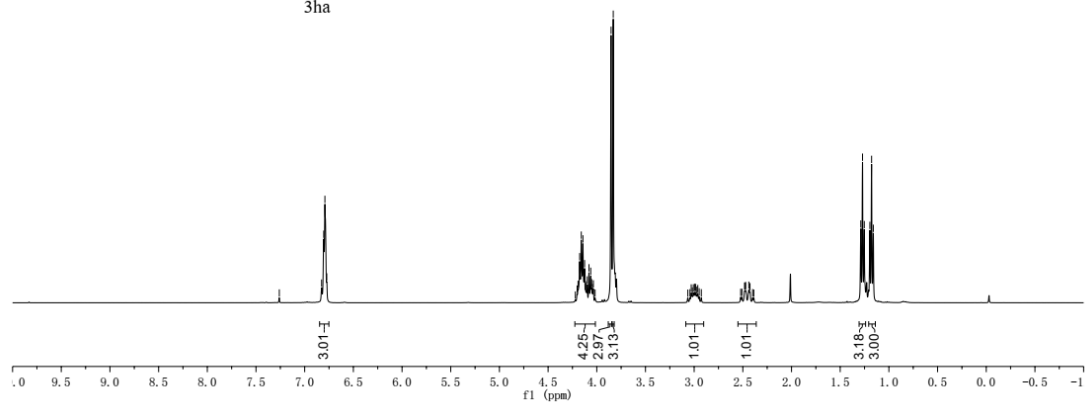

172.4  
163.9  
163.6  
163.2  
149.0  
148.5  
129.9  
119.9  
117.4  
114.9  
112.4  
111.2  
110.7  
77.3  
77.0  
76.7  
62.9  
61.2  
55.8  
55.8  
44.4  
44.4  
44.3  
38.2  
37.8  
13.9  
13.7

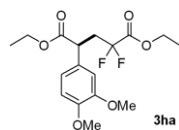

3ha

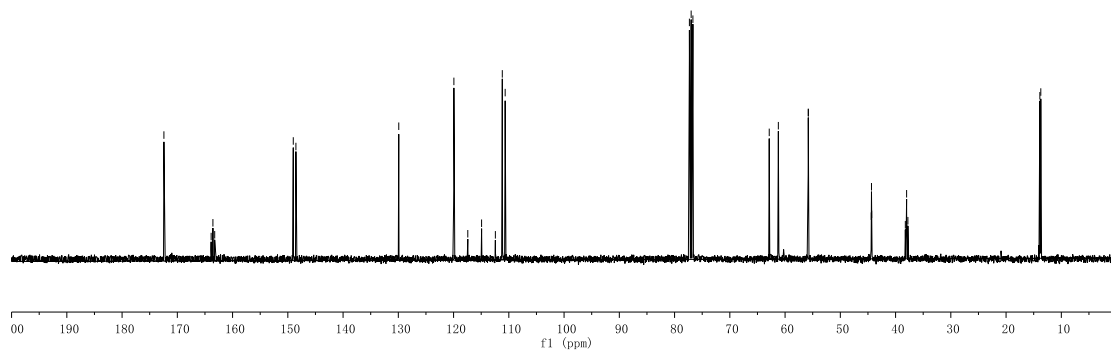

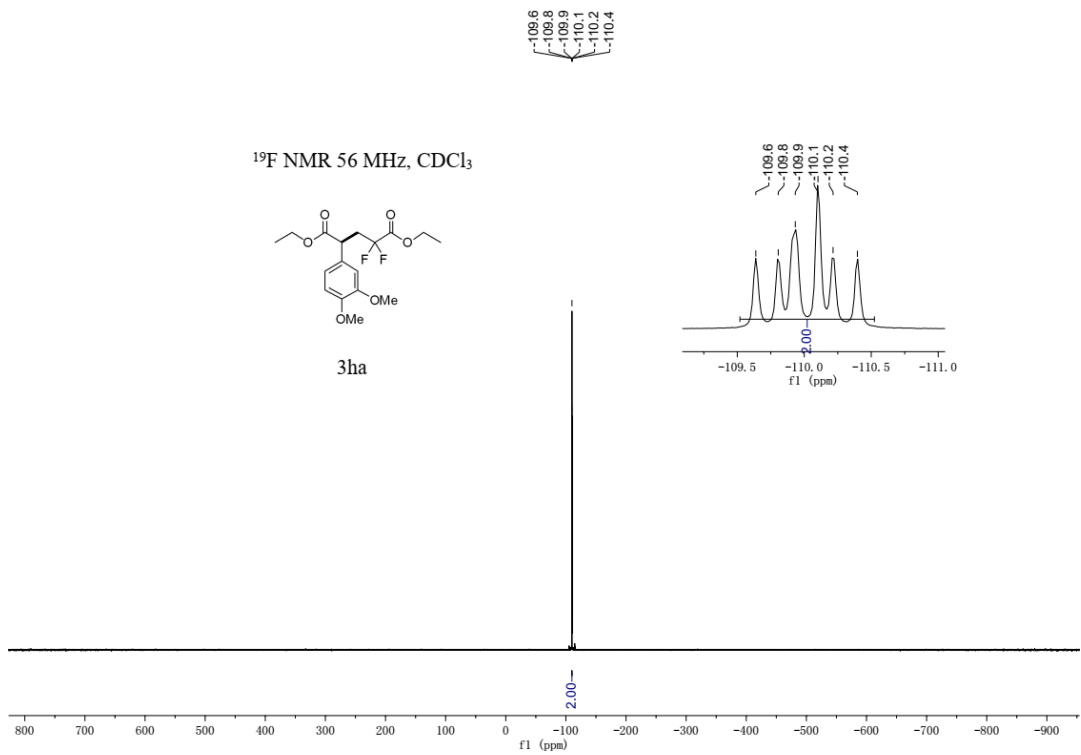

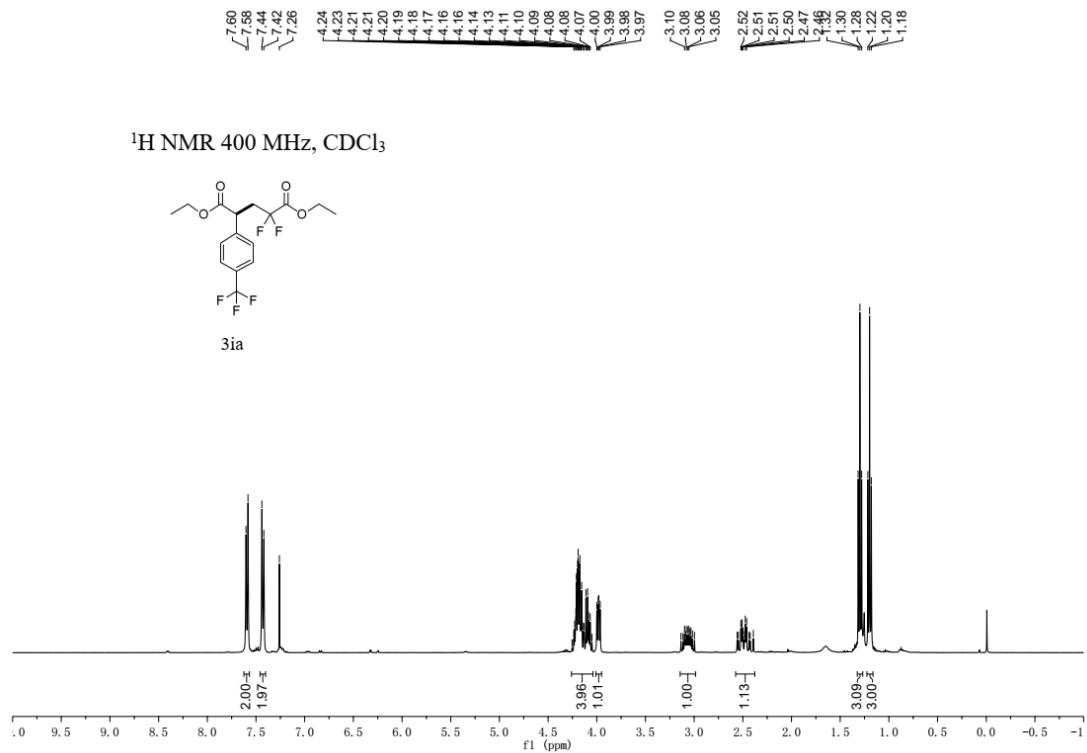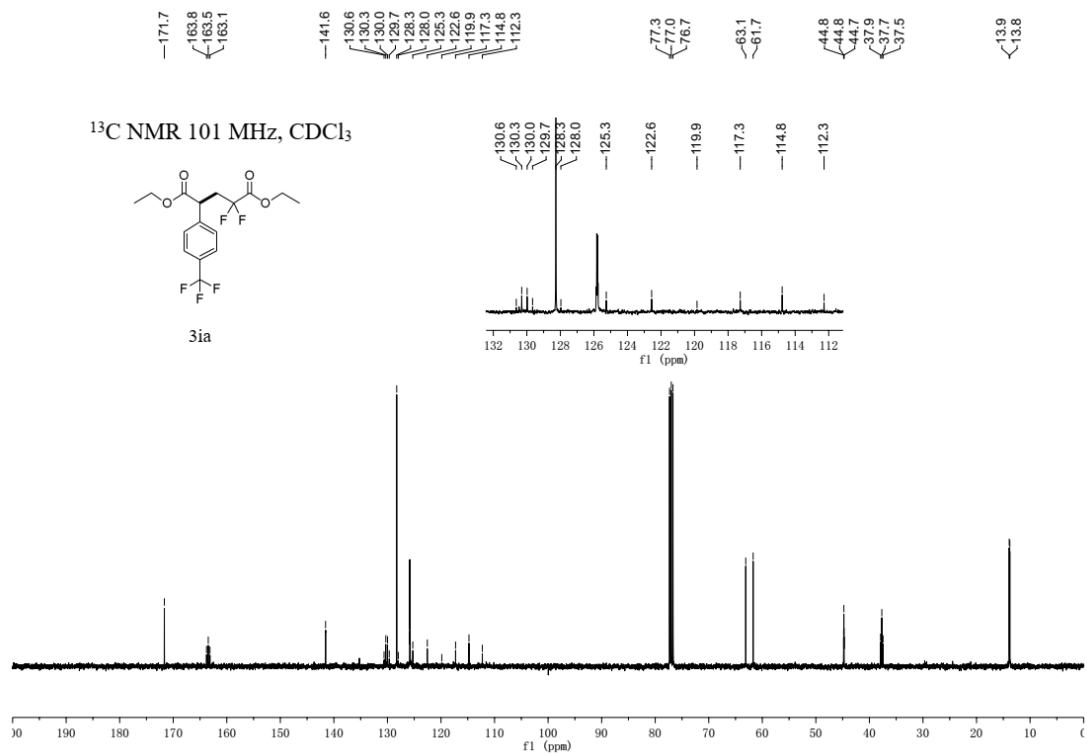

$^{19}\text{F}$  NMR 56 MHz,  $\text{CDCl}_3$

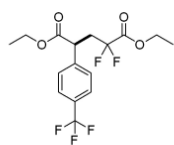

3ia

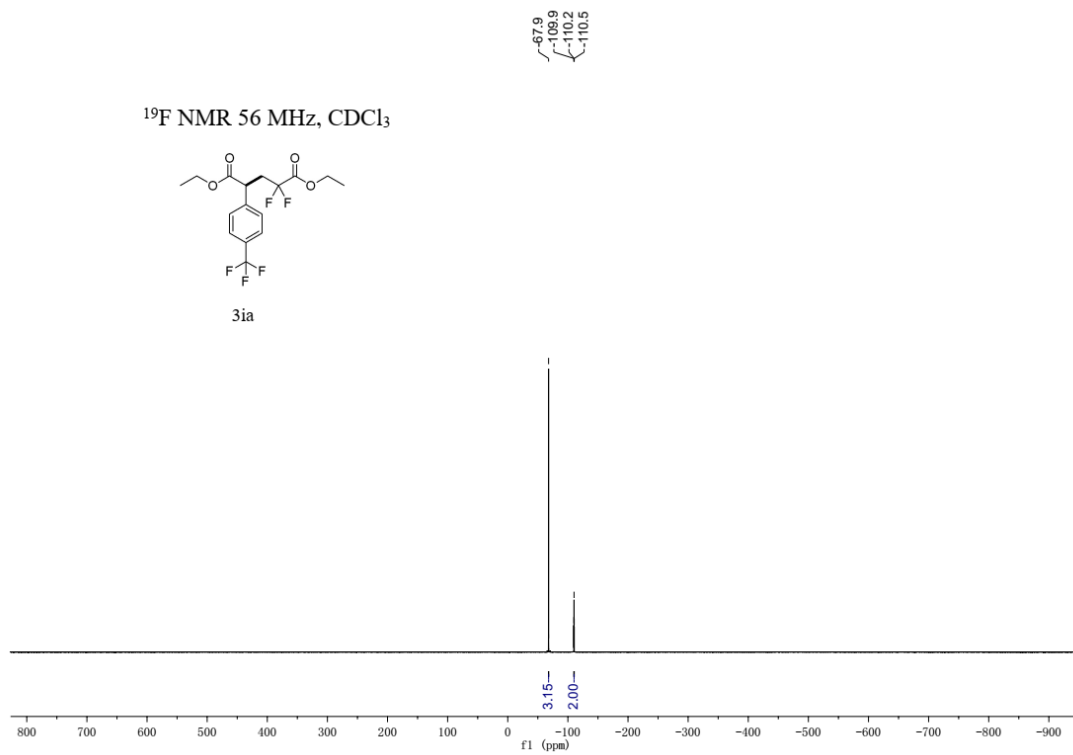

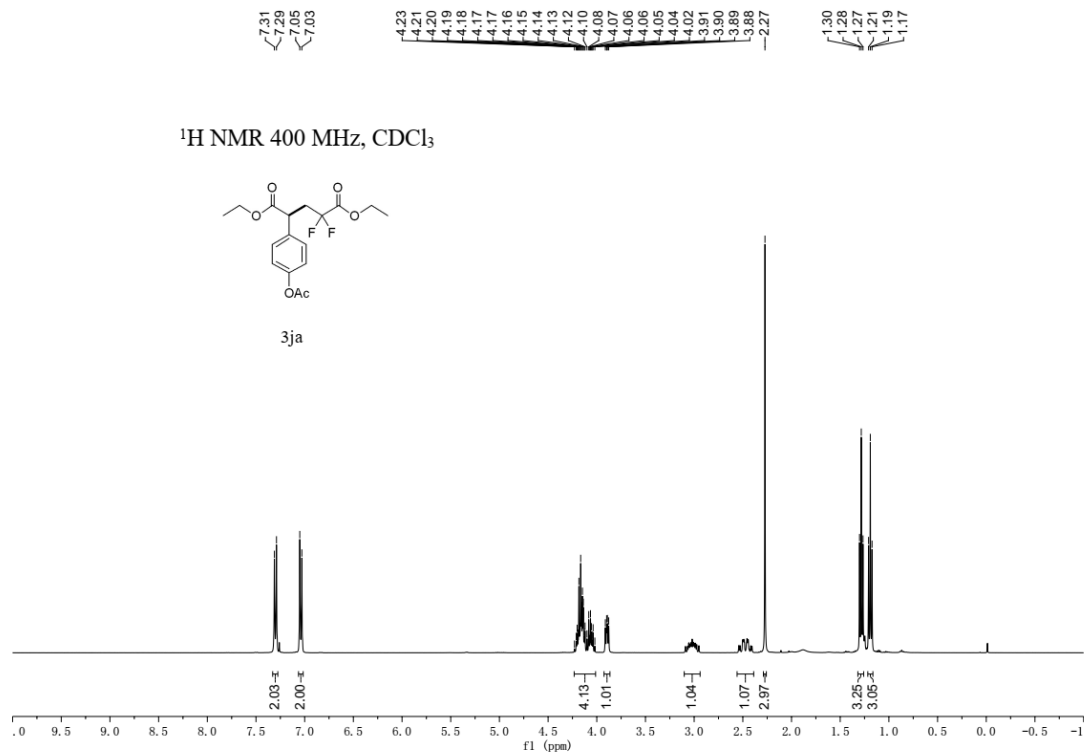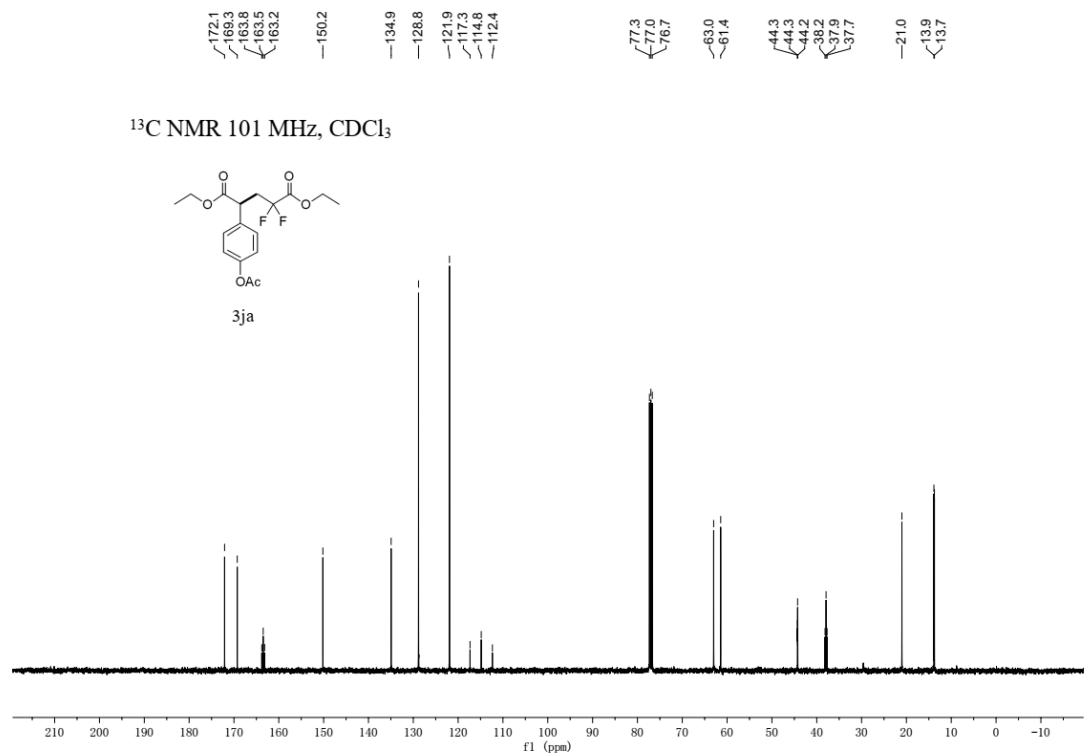

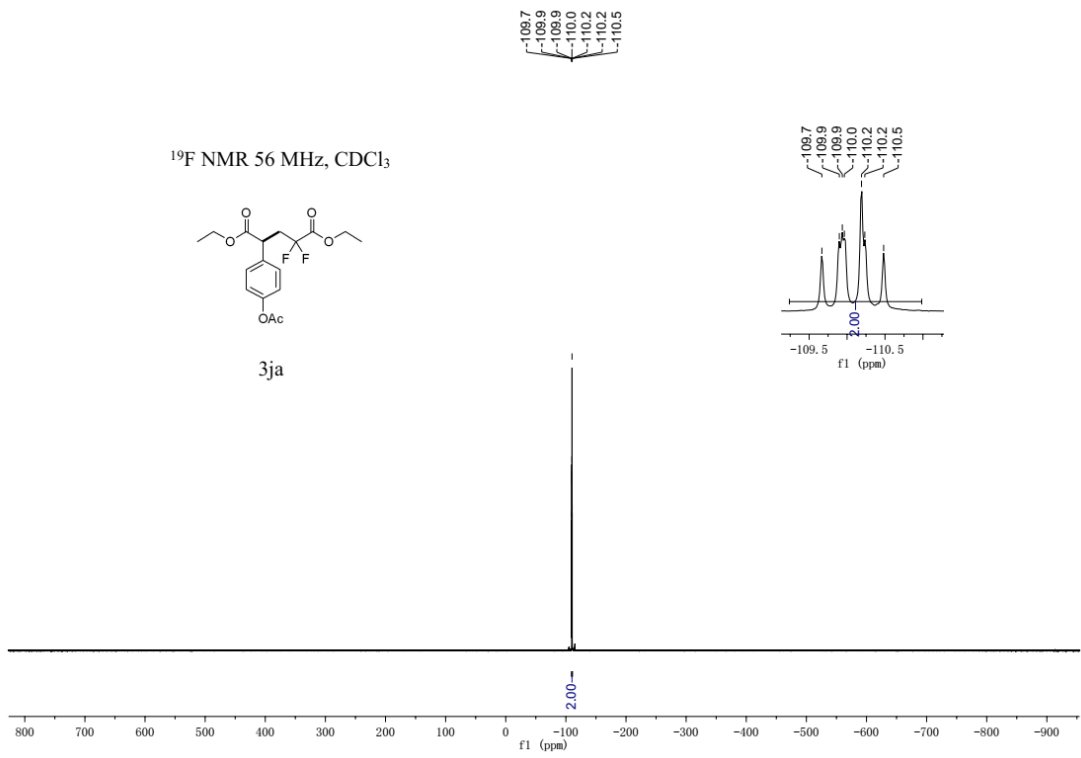

7.29  
7.28  
7.27  
7.26  
7.04  
7.02  
6.99

4.26  
4.24  
4.23  
4.04

1.32  
1.31  
1.29  
1.21  
1.20  
1.18

<sup>1</sup>H NMR 400 MHz, CDCl<sub>3</sub>

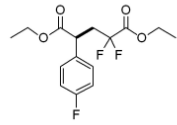

3ka

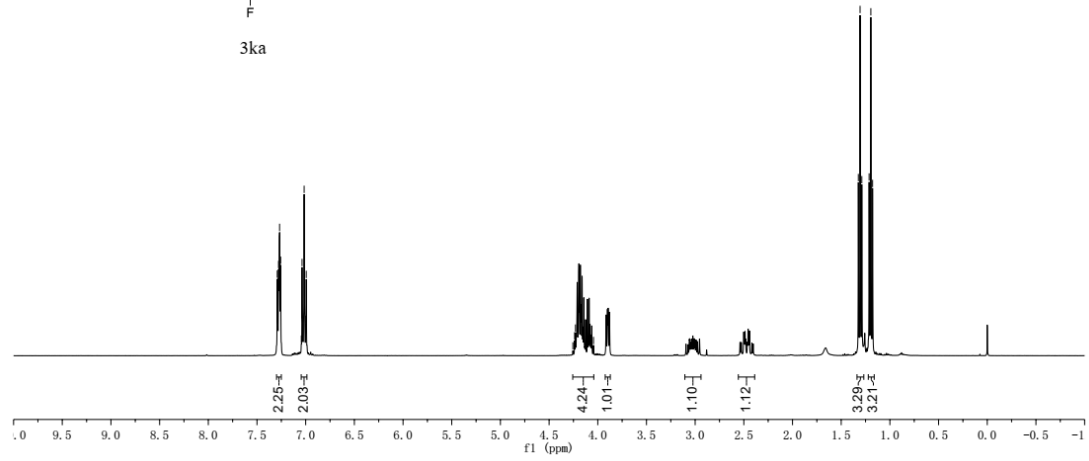

172.2  
163.9  
163.5  
163.5  
163.2  
161.0

133.3  
133.3  
129.5  
129.4

117.4  
115.9  
115.6  
114.9  
112.4

77.3  
77.0  
76.7

63.0  
61.4

44.2  
44.1  
44.1  
38.1  
37.9  
37.7

13.9  
13.8

<sup>13</sup>C NMR 101 MHz, CDCl<sub>3</sub>

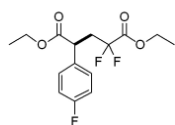

3ka

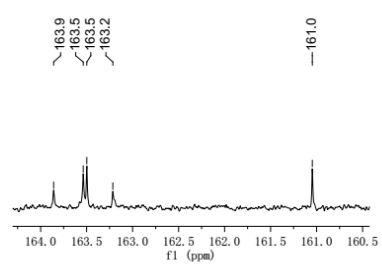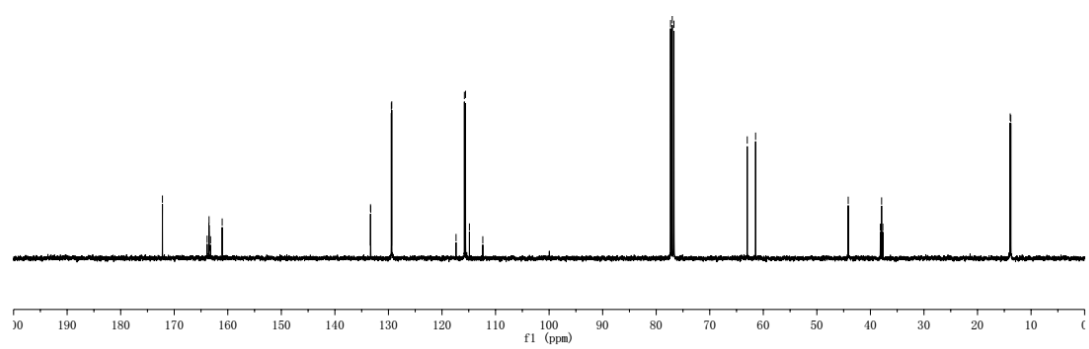

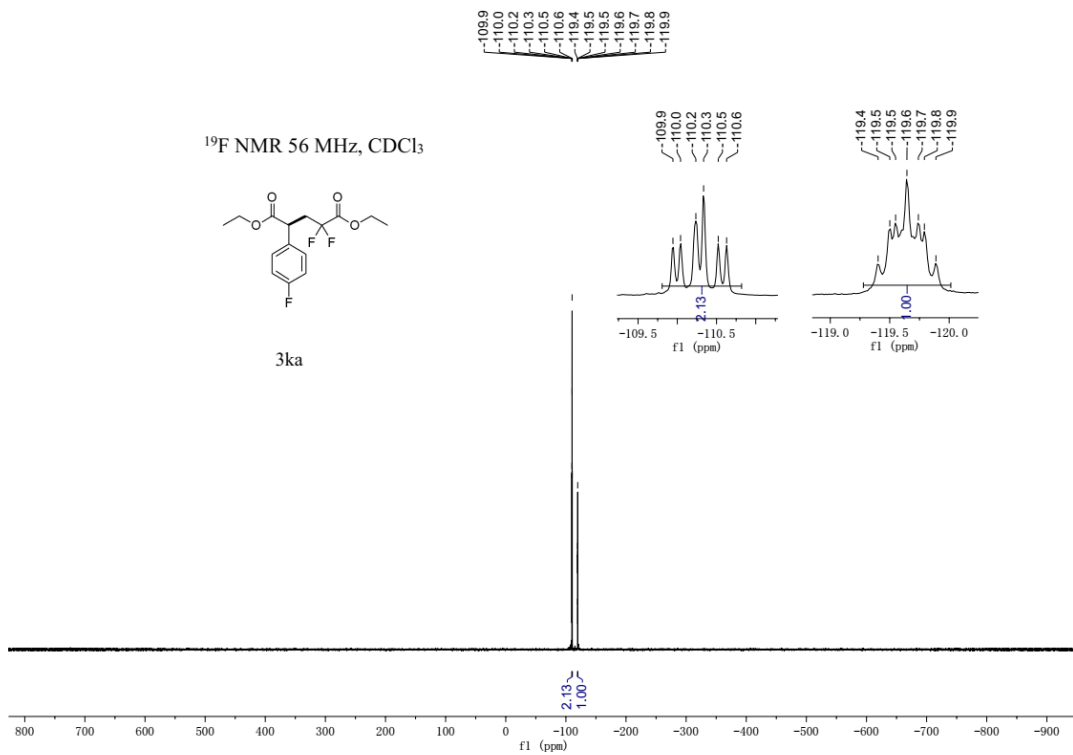



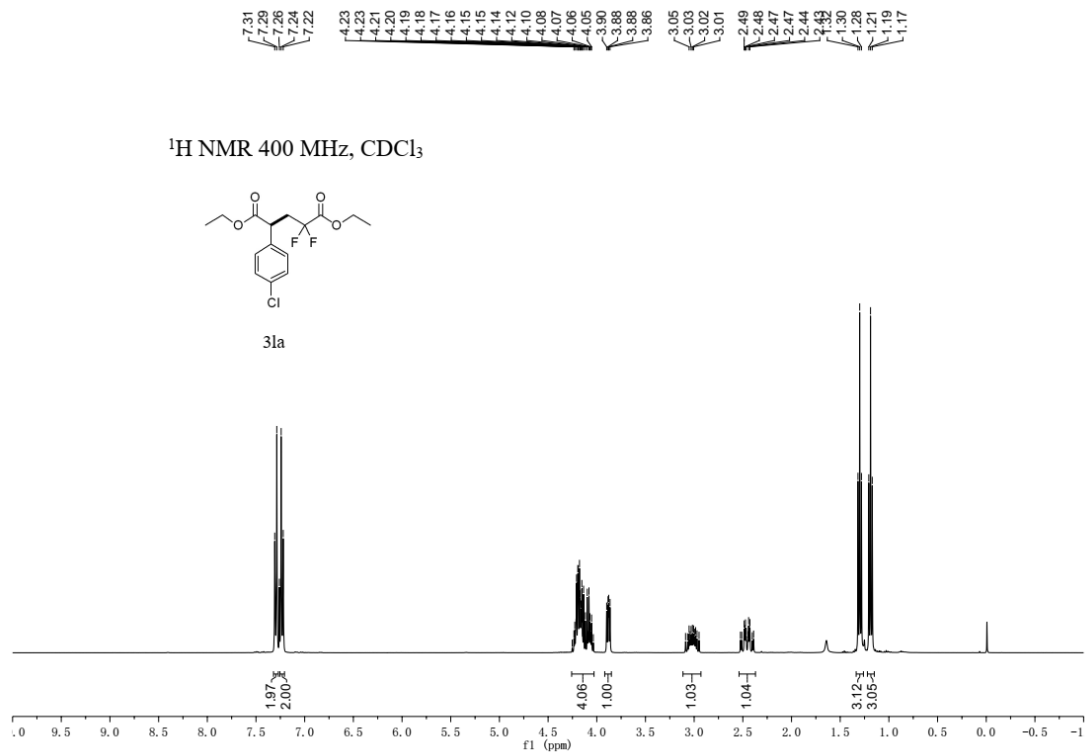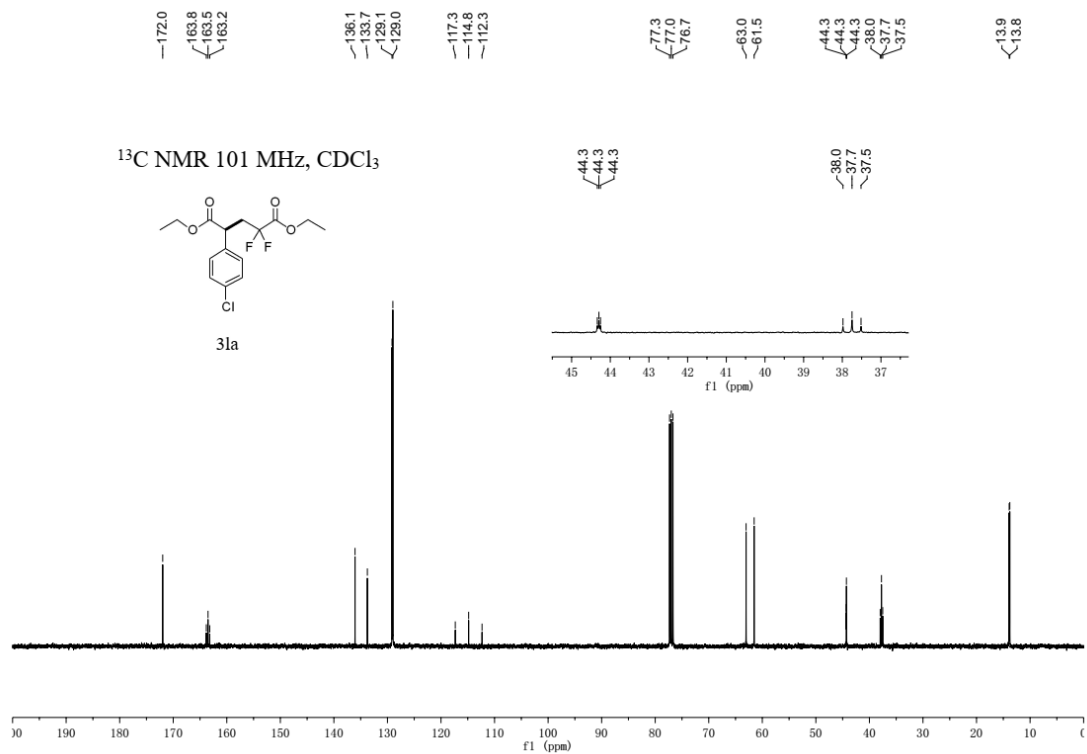

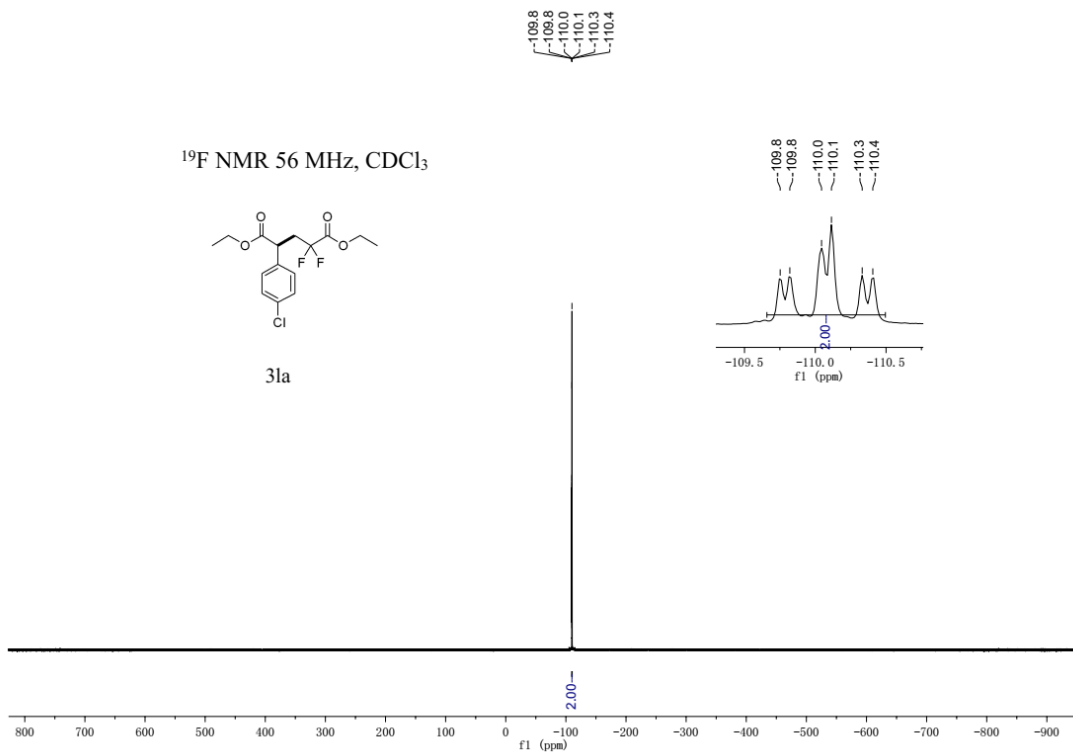

7.32  
7.29  
7.28  
7.26  
7.22  
7.21  
7.20  
4.28  
4.26  
4.24  
4.23  
4.21  
4.20  
4.18  
4.16  
4.15  
4.13  
4.11  
4.10  
4.09  
4.07  
3.92  
3.91  
3.90  
3.89  
3.09  
3.07  
3.06  
3.04  
2.56  
2.55  
2.52  
2.48  
2.47  
1.35  
1.33  
1.32  
1.24  
1.23  
1.21

<sup>1</sup>H NMR 400 MHz, CDCl<sub>3</sub>

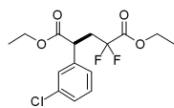

3ma

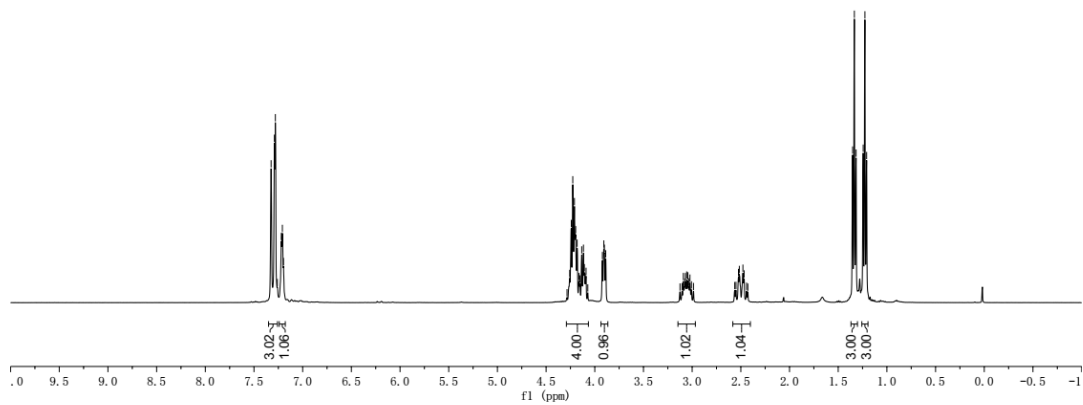

171.8  
163.8  
163.5  
163.2  
139.5  
134.7  
130.1  
128.1  
128.0  
126.1  
117.3  
114.8  
112.3  
77.4  
77.0  
76.7  
63.1  
61.6  
44.7  
44.6  
44.6  
38.0  
37.8  
37.5  
13.9  
13.8

<sup>13</sup>C NMR 101 MHz, CDCl<sub>3</sub>

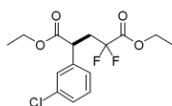

3ma

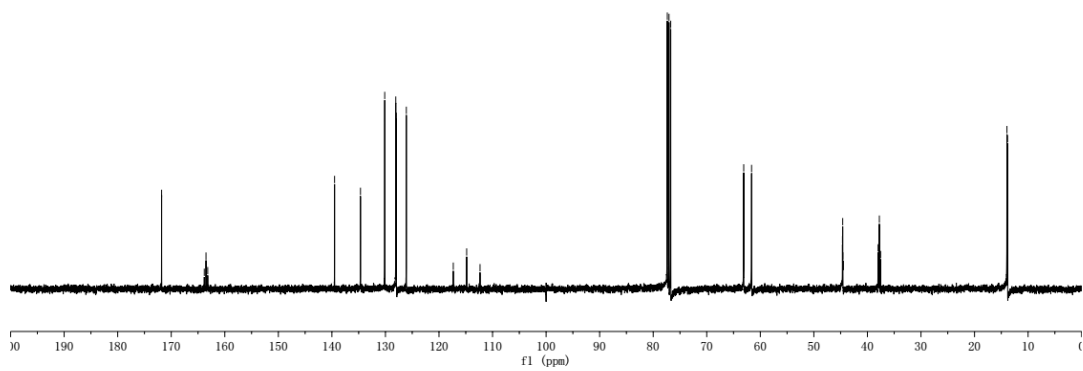

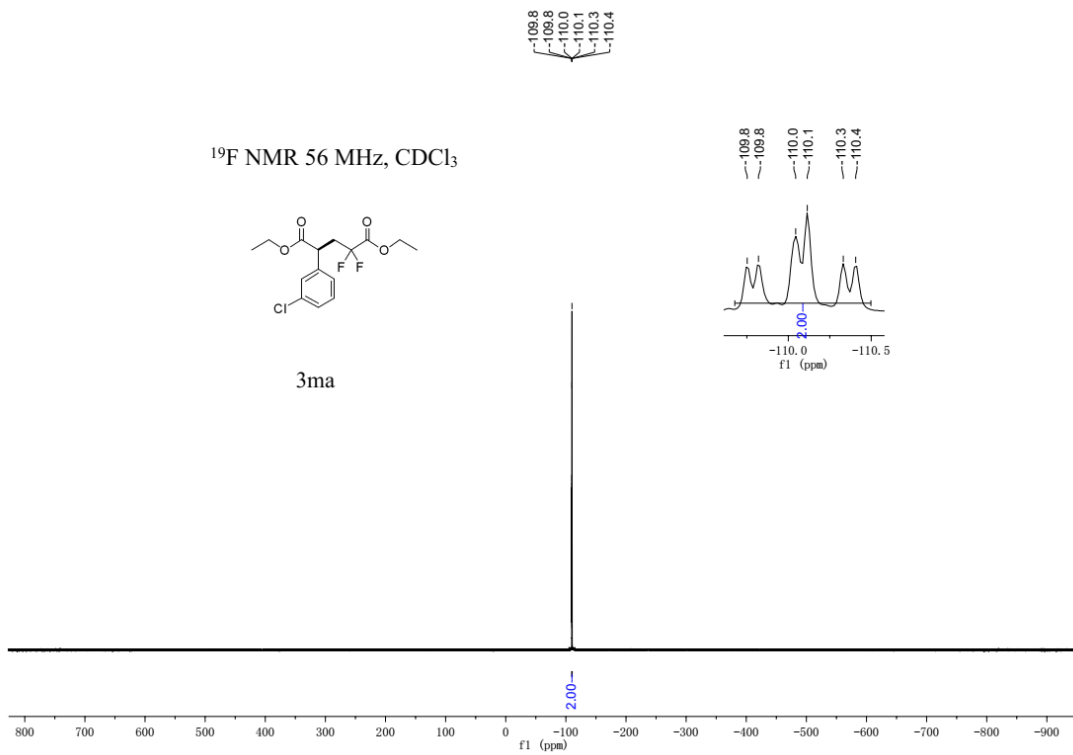

7.46  
7.44  
7.26  
7.18  
7.16  
4.25  
4.23  
4.22  
4.21  
4.19  
4.19  
4.18  
4.17  
4.16  
4.15  
4.14  
4.13  
4.12  
4.10  
4.09  
4.09  
4.07  
4.06  
4.05  
4.03  
3.88  
3.87  
3.86  
3.85  
3.05  
3.03  
3.02  
3.00  
2.98  
2.48  
2.48  
2.47  
2.46  
2.44  
2.43  
2.42  
1.30  
1.28  
1.21  
1.19  
1.17

<sup>1</sup>H NMR 400 MHz, CDCl<sub>3</sub>

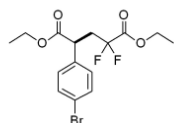

3na

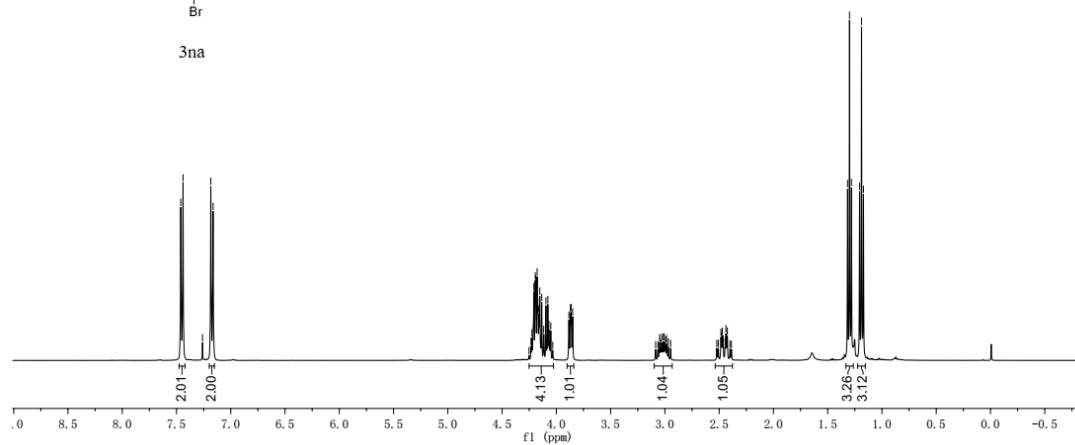

171.9  
163.8  
163.5  
163.2  
136.6  
131.9  
129.5  
121.8  
117.3  
114.8  
112.3  
77.3  
77.0  
76.7  
63.0  
61.5  
44.4  
44.4  
44.3  
37.9  
37.7  
37.5  
13.9  
13.8

<sup>13</sup>C NMR 101 MHz, CDCl<sub>3</sub>

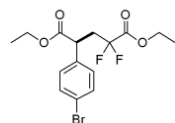

3na

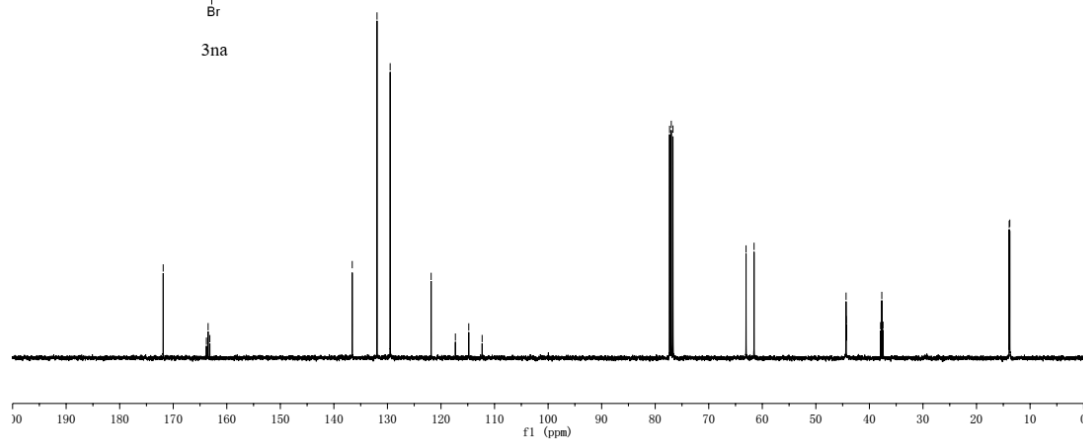

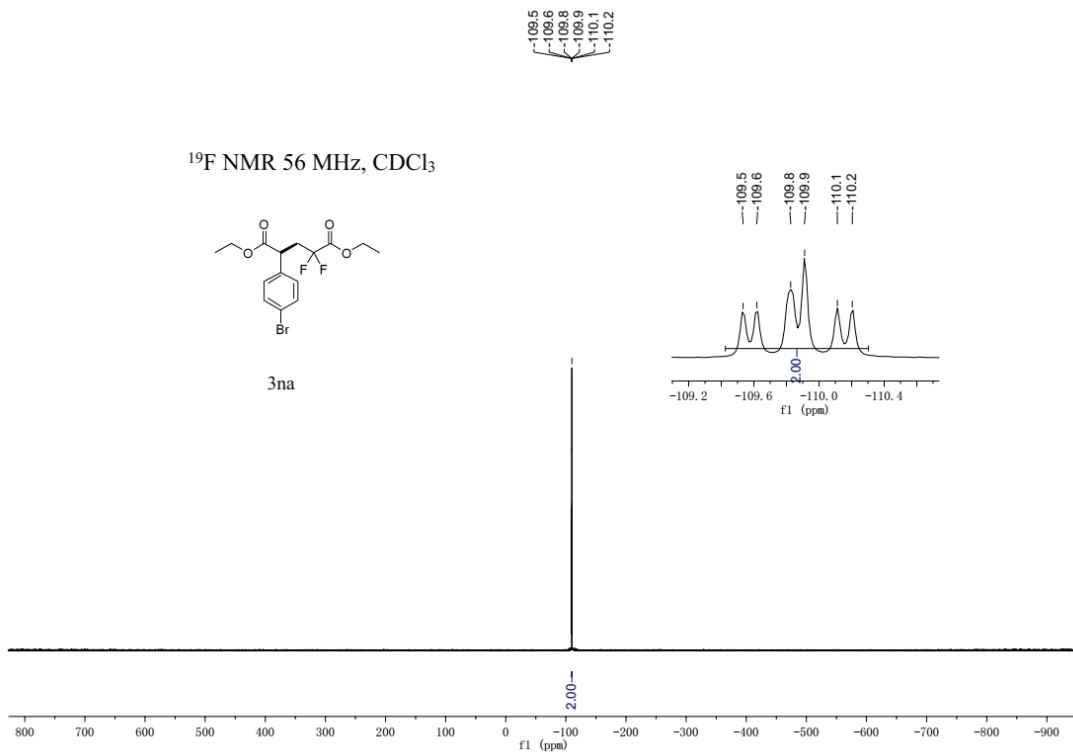

7.45  
7.43  
7.41  
7.26  
7.24  
7.22  
7.21  
7.20  
7.18

4.26  
4.24  
4.23  
4.22  
4.20  
4.18  
4.17  
4.16  
4.14  
4.13  
4.11  
4.09  
4.08  
4.07  
4.06  
4.05

3.06  
3.04  
3.03  
3.01  
2.99

2.53  
2.52  
2.49  
2.48  
2.46  
2.45  
2.44  
2.43

1.31  
1.29  
1.22  
1.20  
1.18

<sup>1</sup>H NMR 400 MHz, CDCl<sub>3</sub>

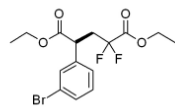

30a

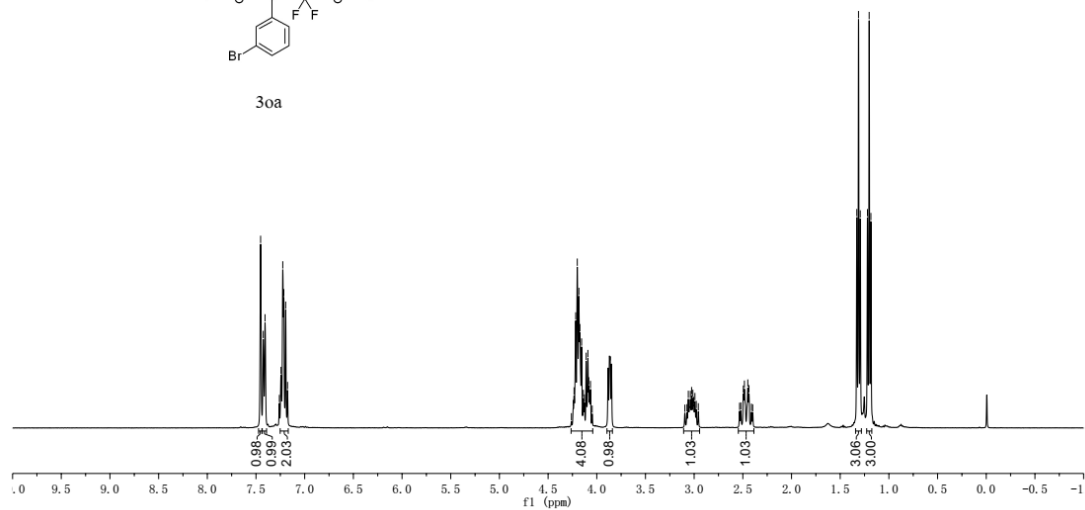

171.8  
163.8  
163.5  
163.2

139.8

31.0  
30.9  
30.4  
26.6  
22.8  
17.3  
14.6  
12.3

77.4  
77.0  
76.7

63.1  
61.6

44.6  
44.6  
44.5  
38.0  
37.8  
37.6

14.0  
13.9

<sup>13</sup>C NMR 101 MHz, CDCl<sub>3</sub>

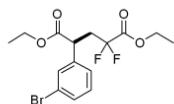

30a

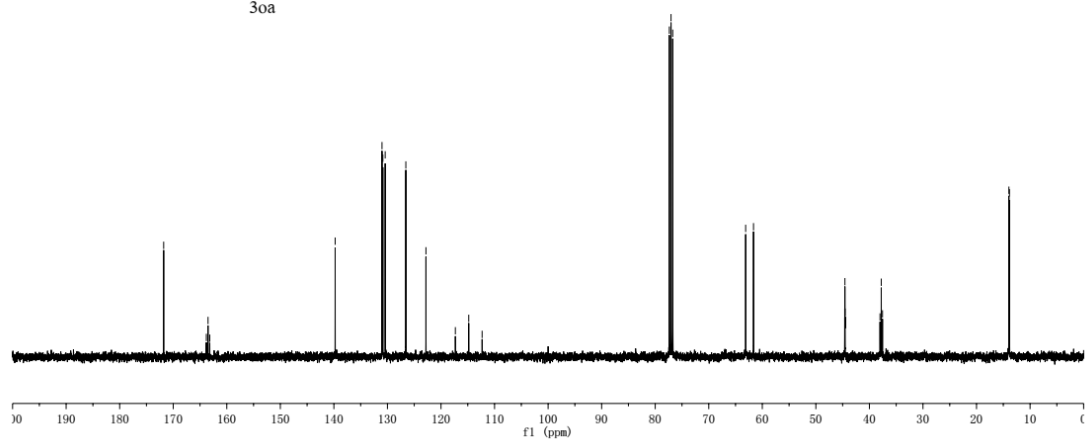

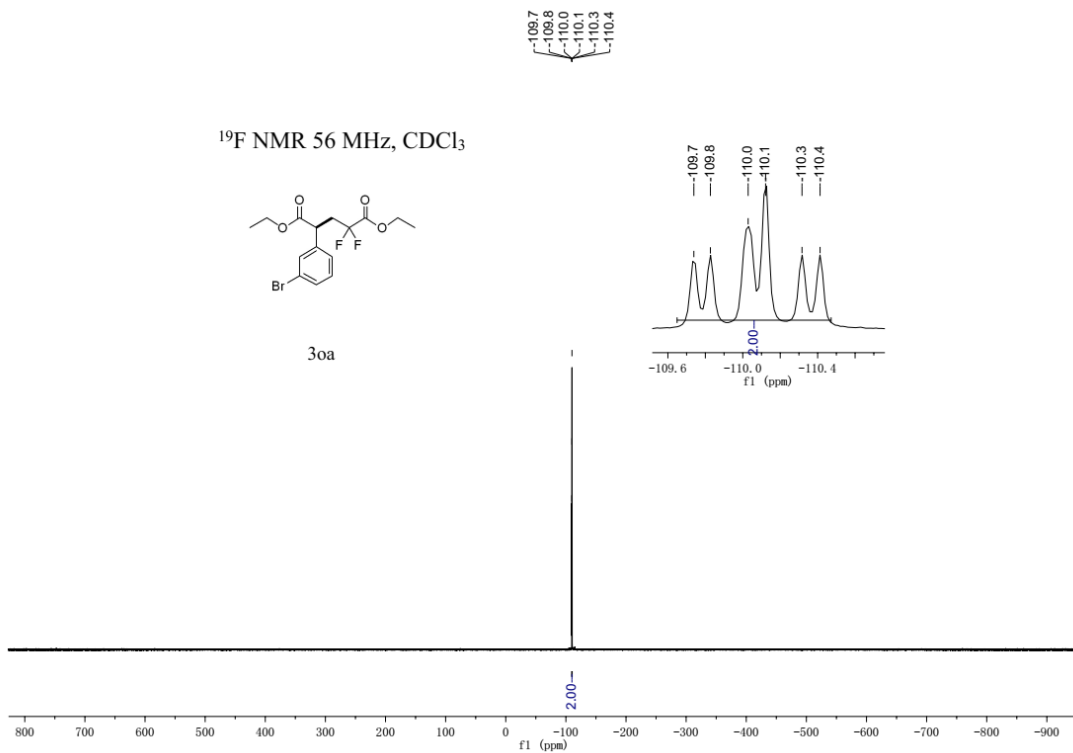



7.87  
7.85  
7.45  
7.43  
7.41  
7.40  
7.38  
7.36  
7.34  
7.26

3.21  
3.19  
3.18  
3.16  
3.14  
3.12  
3.11  
3.10  
3.07  
2.69  
2.68  
2.65  
2.64  
2.60  
2.59  
2.56  
2.55  
1.26  
1.24  
1.22  
1.20  
1.18

$^1\text{H NMR}$  400 MHz,  $\text{CDCl}_3$

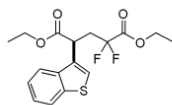

3pa

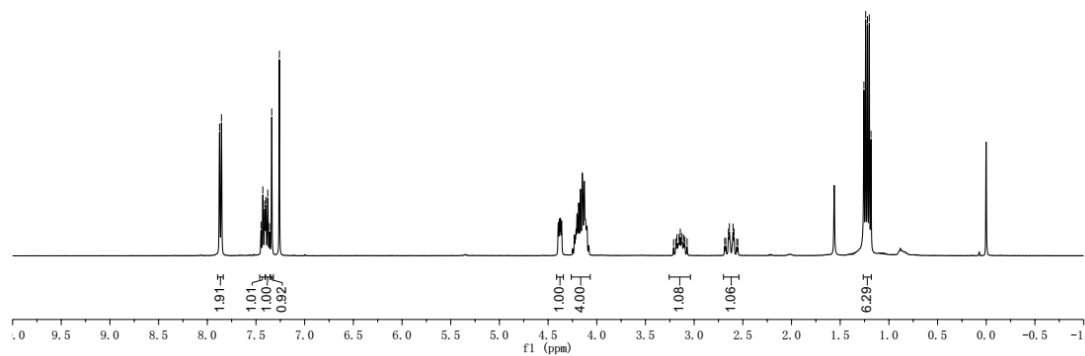

171.8

163.9  
163.5  
163.2

140.4  
137.3  
131.6

24.7  
24.4  
24.0  
23.0  
21.7  
17.5  
15.0  
12.5

77.3  
77.0  
76.7

63.1  
61.6

38.8  
38.7  
37.3  
37.1  
36.9

14.0  
13.8

$^{13}\text{C NMR}$  101 MHz,  $\text{CDCl}_3$

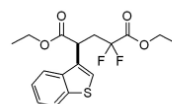

3pa

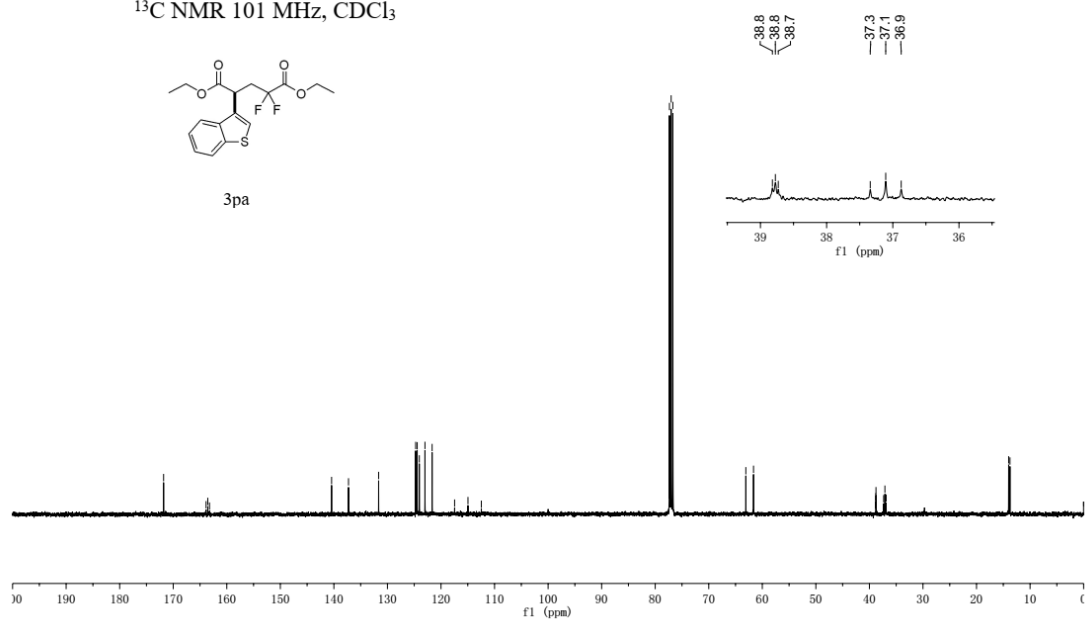

$^{19}\text{F}$  NMR 56 MHz,  $\text{CDCl}_3$

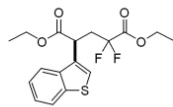

3pa

-108.8  
-109.0  
-109.0  
-109.3  
-109.6

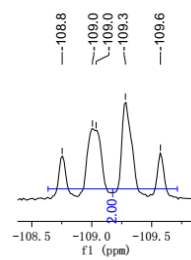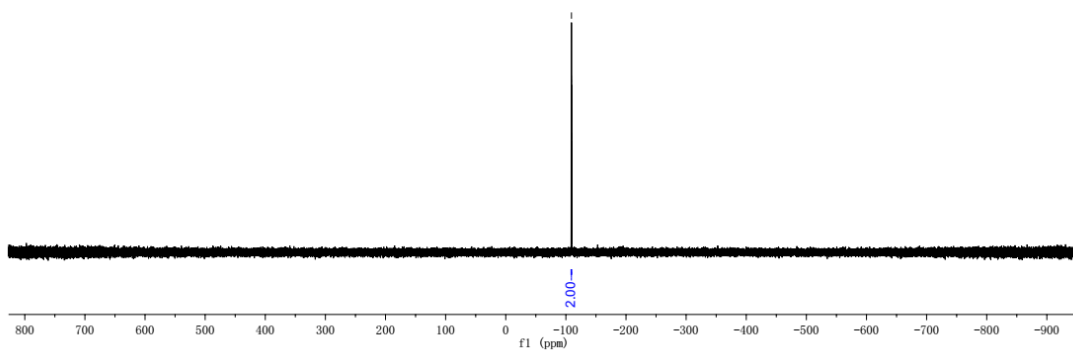

8.87, 8.11, 8.09, 7.82, 7.80, 7.74, 7.72, 7.70, 7.58, 7.56, 7.26, 4.24, 4.22, 4.21, 4.20, 4.19, 4.18, 4.16, 4.15, 4.13, 4.11, 4.10, 4.09, 4.08, 4.06, 3.21, 3.19, 3.17, 3.16, 2.69, 2.67, 2.65, 2.64, 2.60, 2.59, 1.25, 1.27, 1.25, 1.22, 1.20, 1.18

<sup>1</sup>H NMR 400 MHz, CDCl<sub>3</sub>

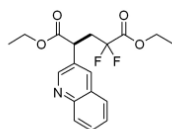

3qa

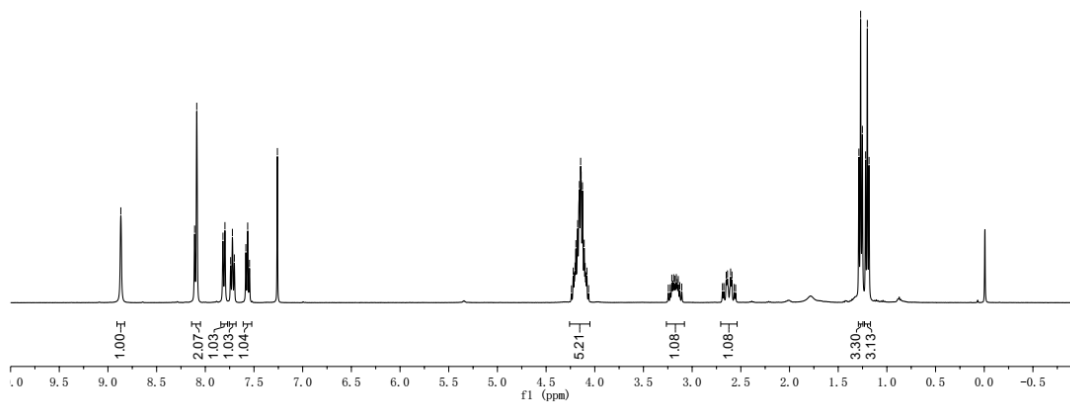

171.7, 163.8, 163.5, 163.1, 150.4, 147.6, 134.5, 130.5, 129.8, 129.3, 127.9, 127.7, 127.2, 117.3, 114.8, 112.3, 77.4, 77.0, 76.7, 63.2, 61.9, 42.8, 42.7, 42.7, 37.9, 37.7, 37.4, 14.0, 13.8

<sup>13</sup>C NMR 101 MHz, CDCl<sub>3</sub>

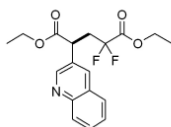

3qa

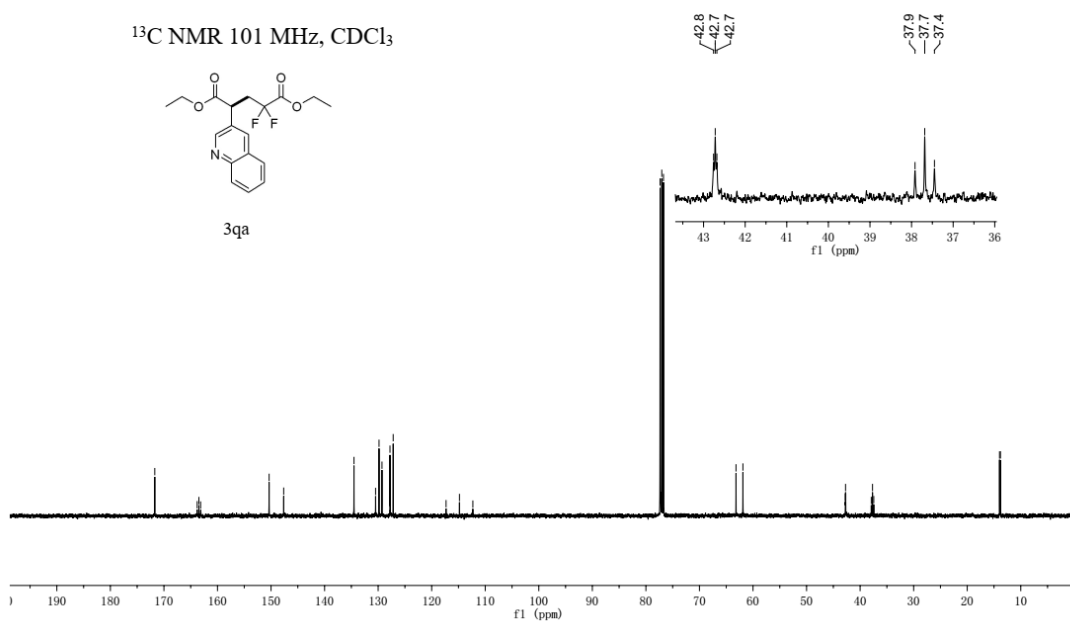

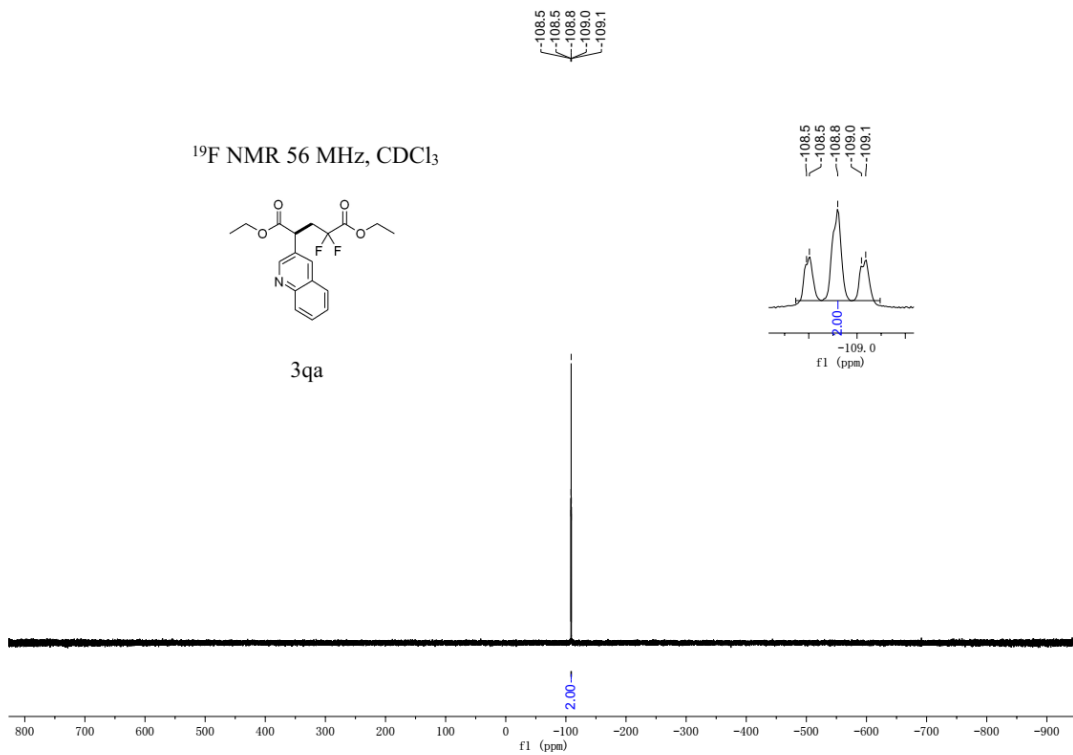

7.59  
7.59  
7.58  
7.58  
7.57  
7.57  
7.36  
7.36  
7.45  
7.45  
7.43  
7.40  
7.38  
7.36  
7.34  
7.26  
4.24  
4.23  
4.23  
4.22  
4.21  
4.21  
4.19  
4.18  
4.16  
4.16  
4.12  
4.11  
4.09  
4.00  
3.98  
3.96  
3.15  
3.13  
3.11  
3.10  
2.59  
2.58  
2.56  
2.57  
2.54  
2.54  
1.33  
1.31  
1.29  
1.25  
1.23  
1.22

<sup>1</sup>H NMR 400 MHz, CDCl<sub>3</sub>

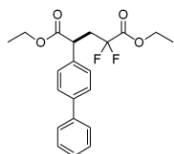

3ra

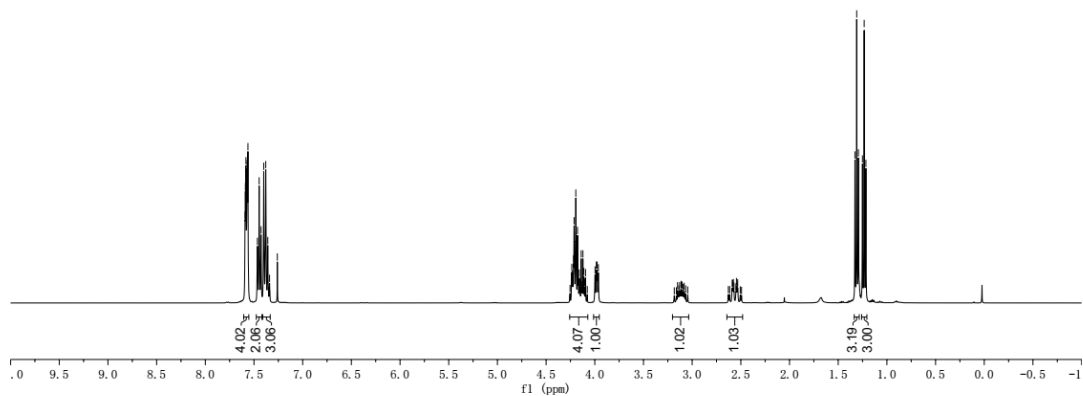

172.3  
163.9  
163.6  
163.3  
140.7  
140.4  
136.5  
128.8  
128.2  
127.5  
127.4  
127.0  
117.5  
115.0  
112.5  
77.3  
77.0  
76.7  
62.9  
61.4  
44.6  
44.6  
44.5  
38.1  
37.9  
37.7  
13.9  
13.8

<sup>13</sup>C NMR 101 MHz, CDCl<sub>3</sub>

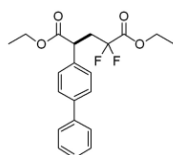

3ra

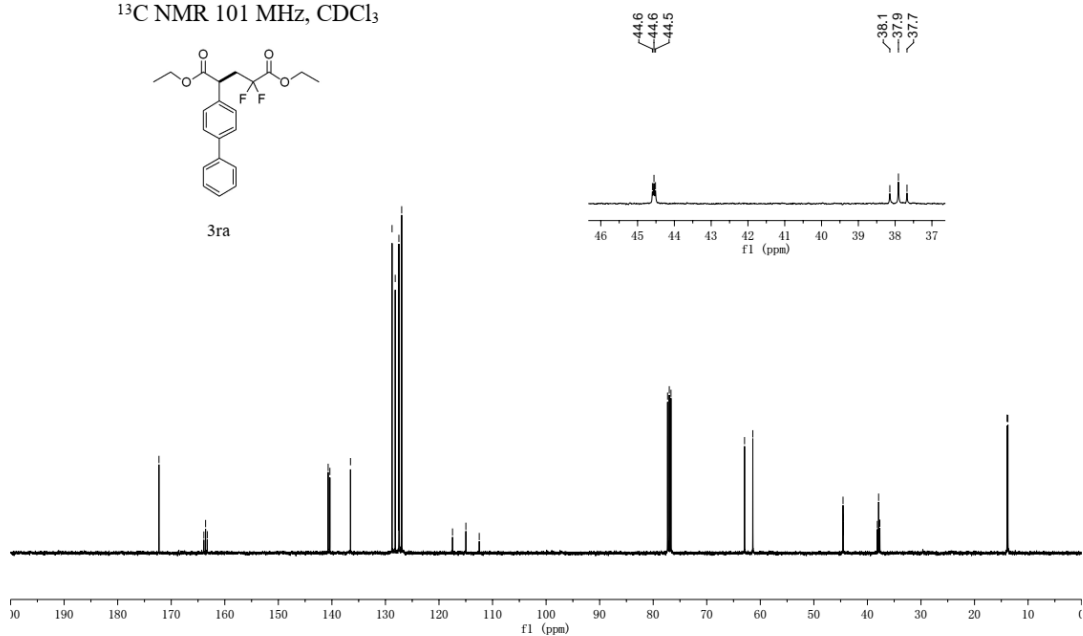

-109.6  
-109.7  
-109.9  
-110.0  
-110.2  
-110.3

$^{19}\text{F}$  NMR 56 MHz,  $\text{CDCl}_3$

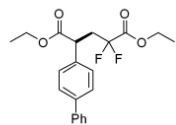

3ra

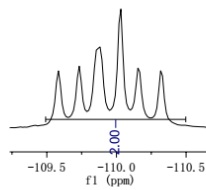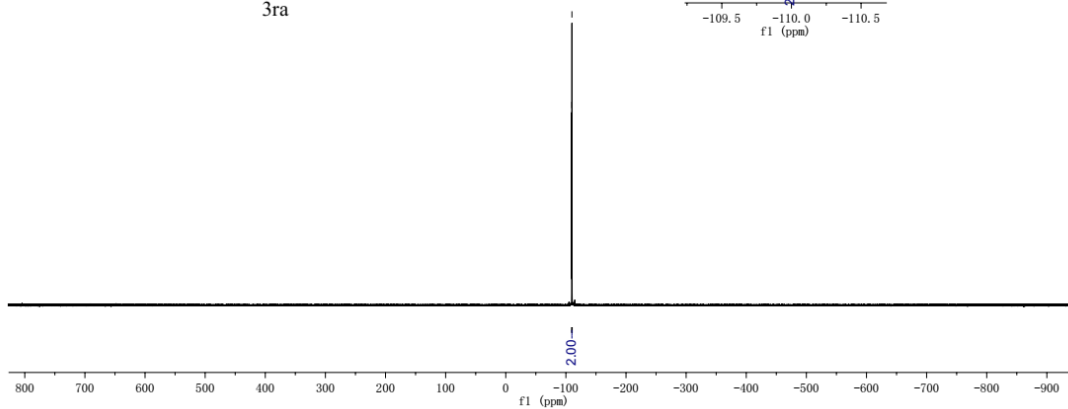

7.84  
7.82  
7.81  
7.77  
7.51  
7.50  
7.50  
7.48  
7.47  
7.46  
7.45  
7.43  
7.42  
7.26  
4.22  
4.21  
4.20  
4.19  
4.19  
4.18  
4.16  
4.15  
4.14  
4.14  
4.13  
4.12  
4.11  
4.10  
4.09  
4.08  
4.07  
3.21  
3.19  
3.17  
3.16  
2.65  
2.64  
2.64  
2.63  
2.61  
2.60  
1.29  
1.25  
1.23  
1.22  
1.20  
1.18

<sup>1</sup>H NMR 400 MHz, CDCl<sub>3</sub>

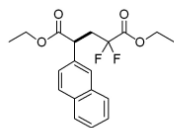

3sa

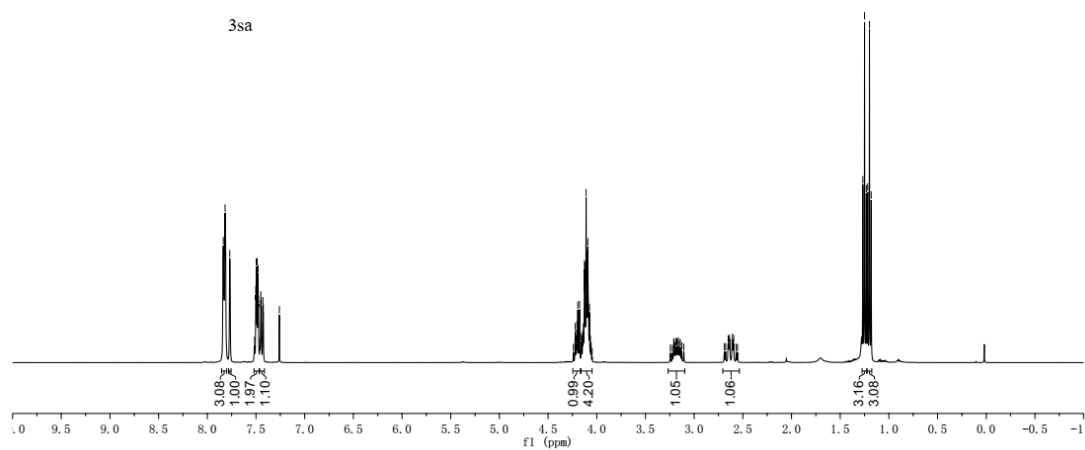

172.3  
163.9  
163.6  
163.3  
134.9  
133.3  
132.7  
128.6  
127.8  
127.6  
126.8  
126.4  
126.2  
124.4  
117.5  
115.0  
112.5

77.3  
77.0  
76.7  
62.9  
61.4  
45.0  
45.0  
38.1  
37.9  
37.7  
13.9  
13.7

<sup>13</sup>C NMR 101 MHz, CDCl<sub>3</sub>

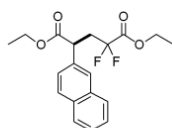

3sa

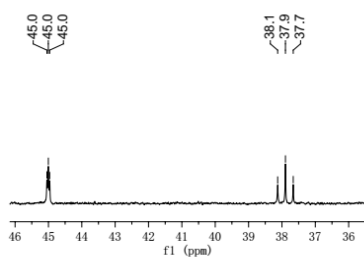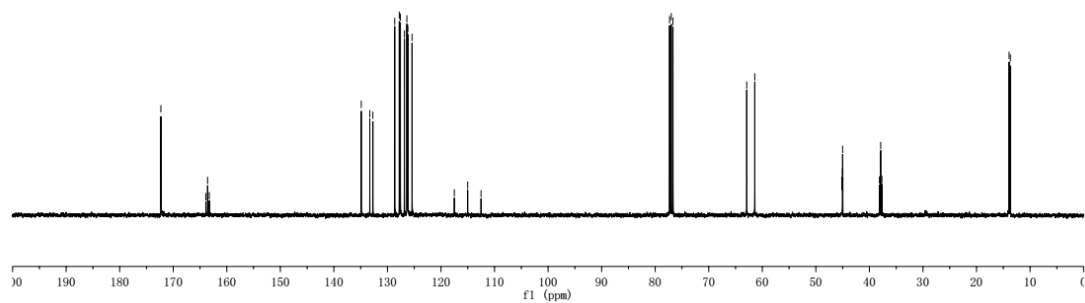

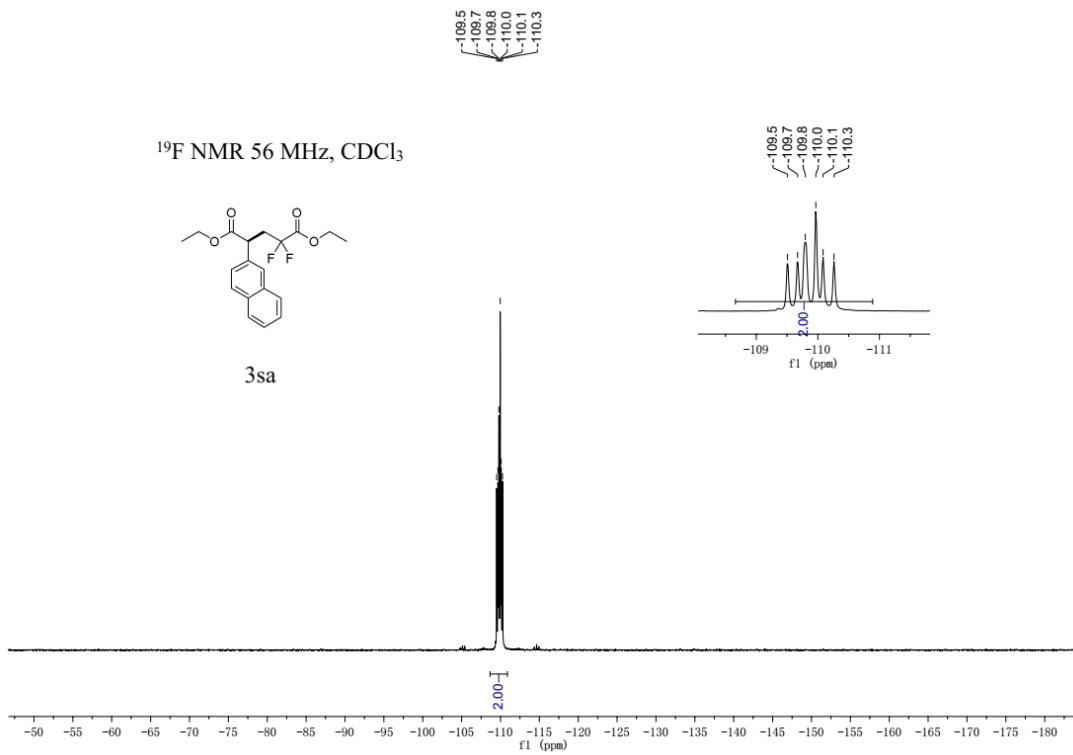



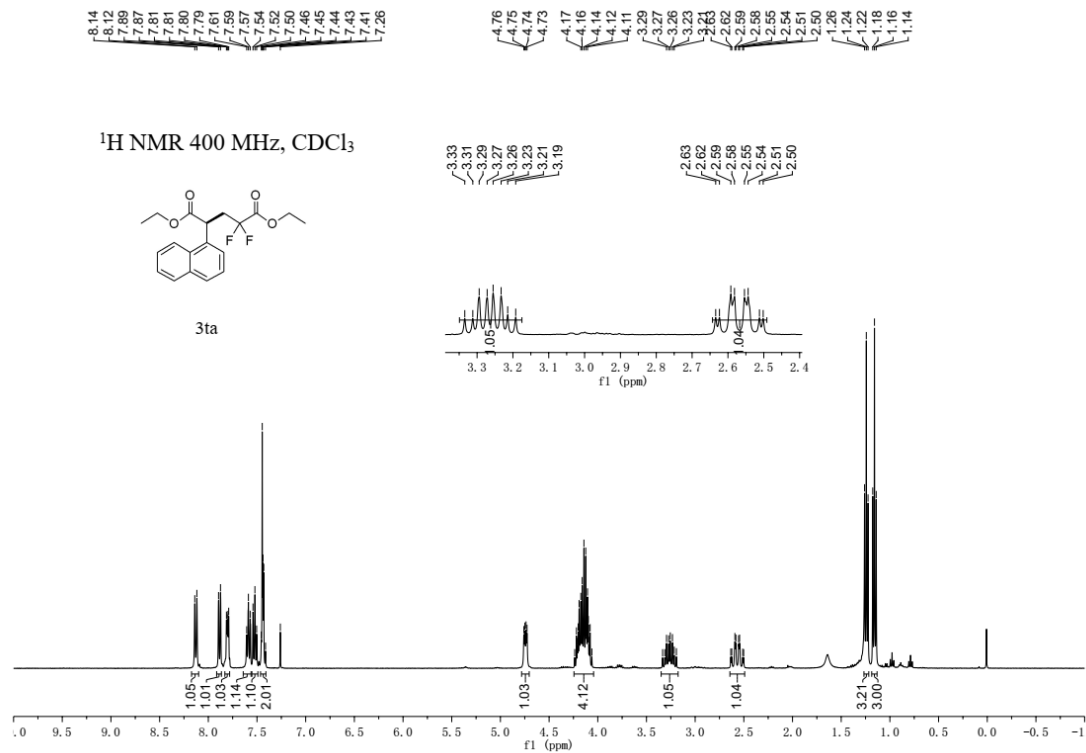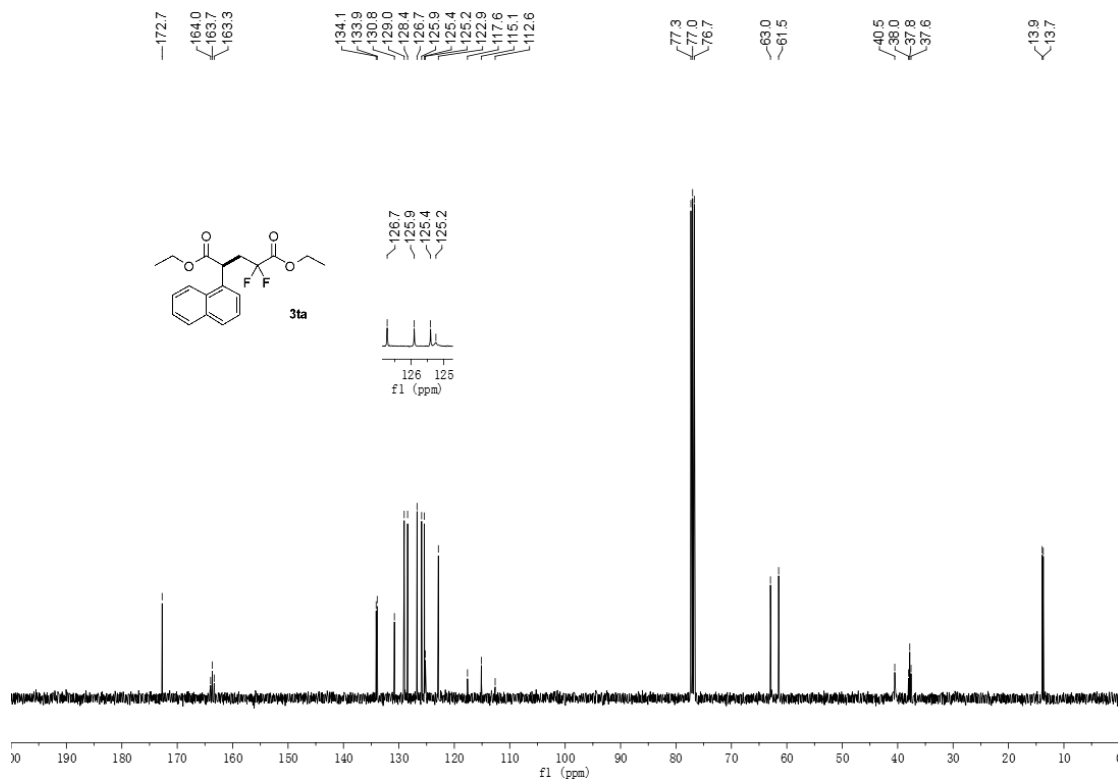

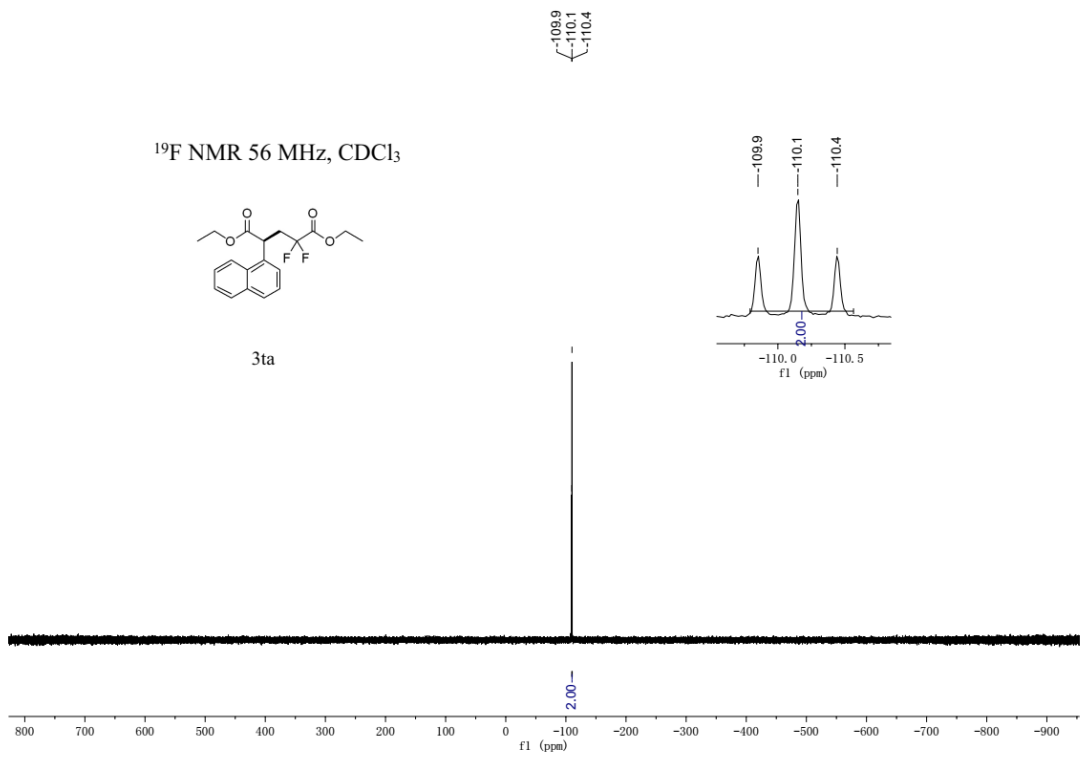

7.34  
7.32  
7.31  
7.30  
7.28  
7.26

4.17  
4.15  
4.14  
4.12  
4.10  
4.08  
4.06  
4.05  
4.03  
4.02  
4.01  
3.92  
3.91  
3.90  
3.89

2.56  
2.55  
2.52  
2.51  
2.46  
2.47  
2.44

1.67  
1.66  
1.64  
1.62  
1.60  
1.57  
1.56  
1.54  
1.52  
1.50  
1.40  
1.39  
1.37  
1.35  
1.30  
1.29  
1.27  
1.25  
1.23

<sup>1</sup>H NMR 400 MHz, CDCl<sub>3</sub>

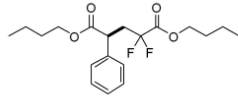

3ab

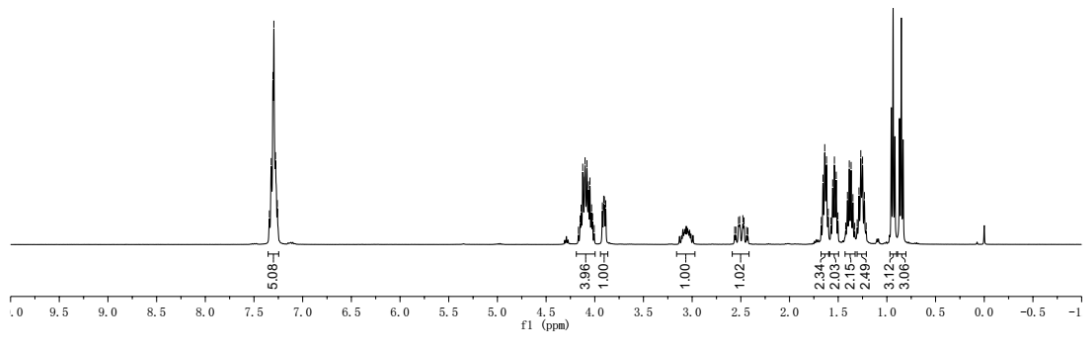

172.4  
164.1  
163.7  
163.4

137.7  
128.8  
127.8

117.6  
115.1  
112.6

77.4  
77.0  
76.7

66.7  
65.2

45.0  
45.0  
44.9

37.9  
37.8  
30.2

18.9  
13.6  
13.6

<sup>13</sup>C NMR 101 MHz, CDCl<sub>3</sub>

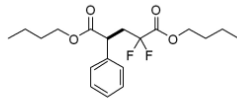

3ab

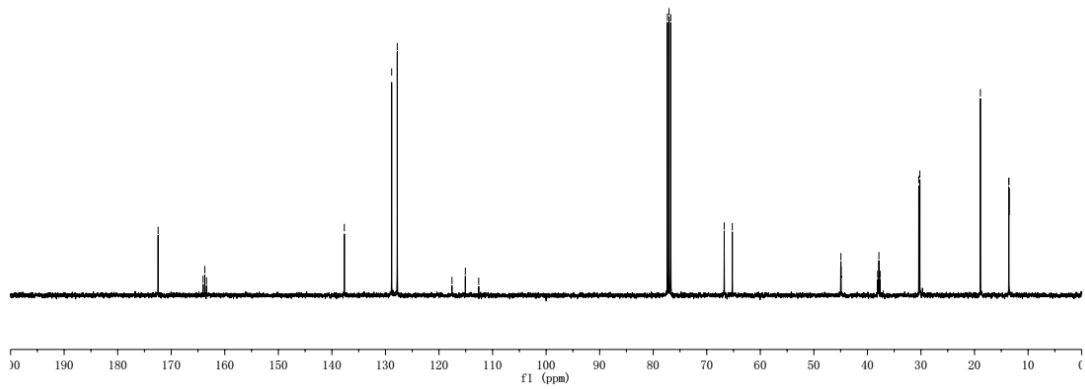

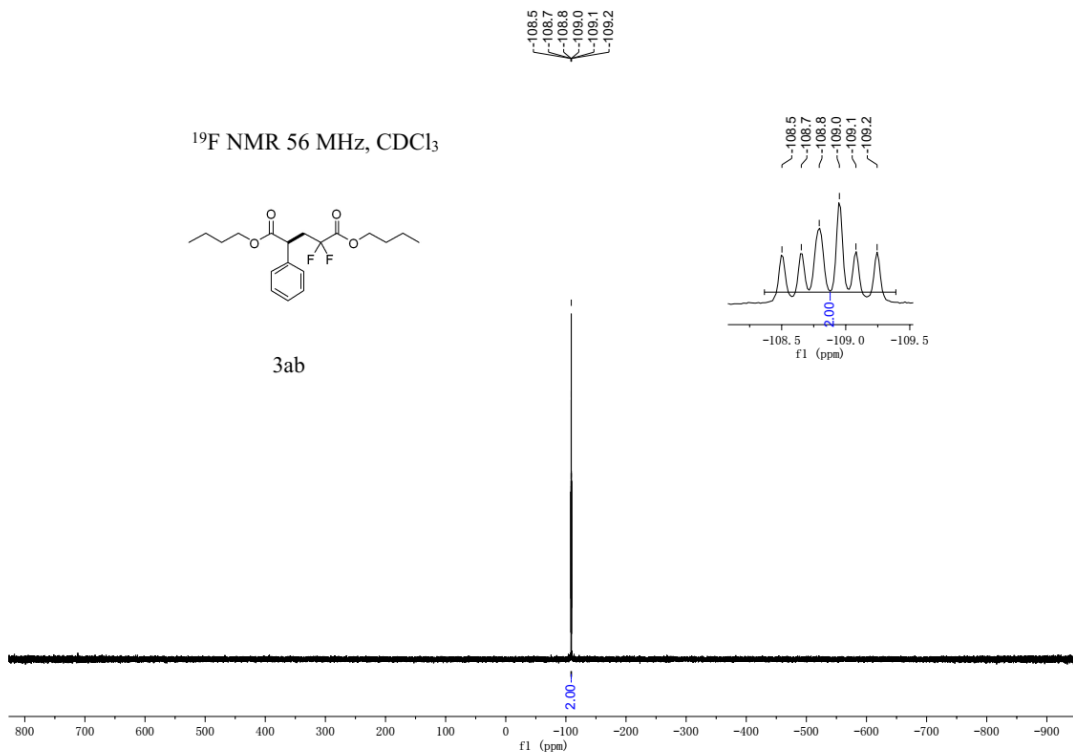

**<sup>1</sup>H NMR (700 MHz, CDCl<sub>3</sub>) 3ac**

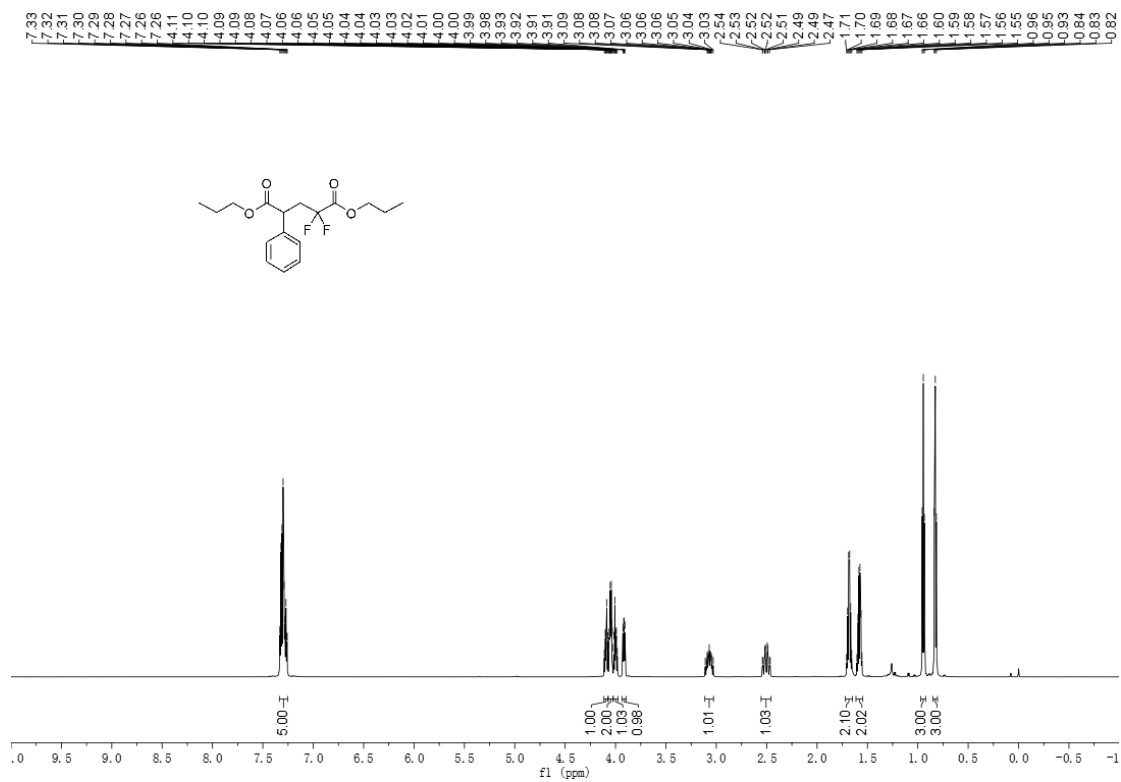

**<sup>13</sup>C NMR (176 MHz, CDCl<sub>3</sub>) 3ac**

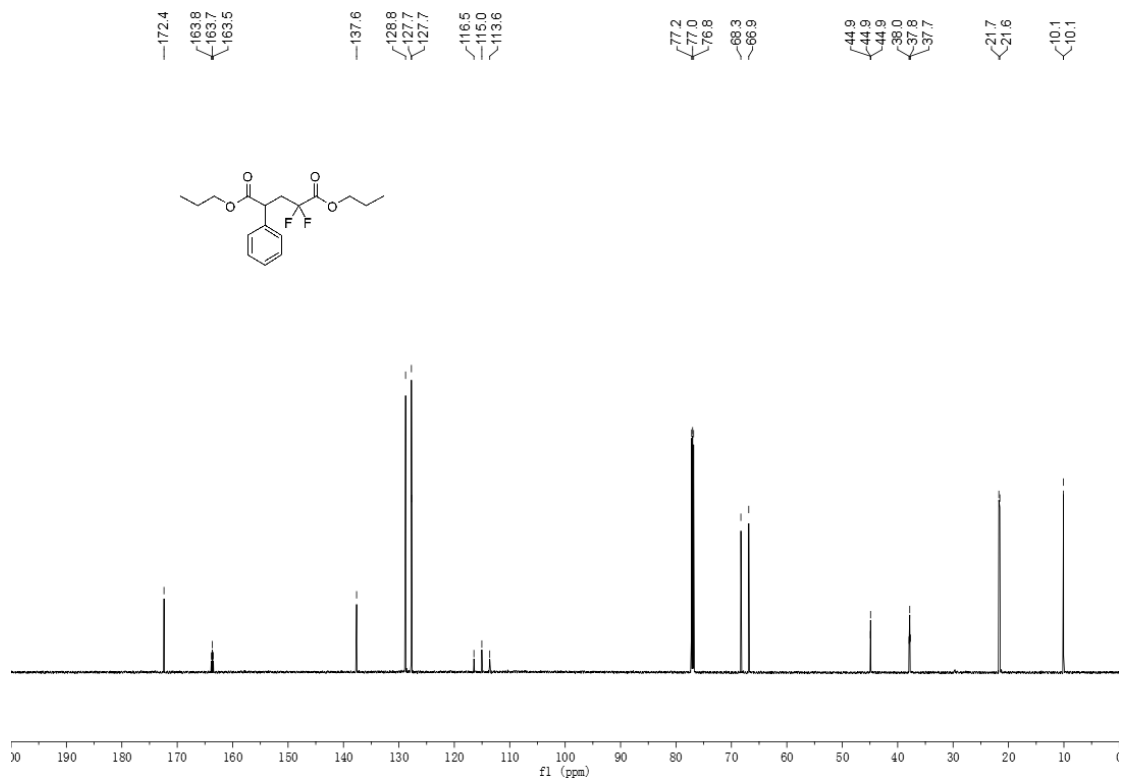

**<sup>19</sup>F NMR (56 MHz, CDCl<sub>3</sub>) 3ac**

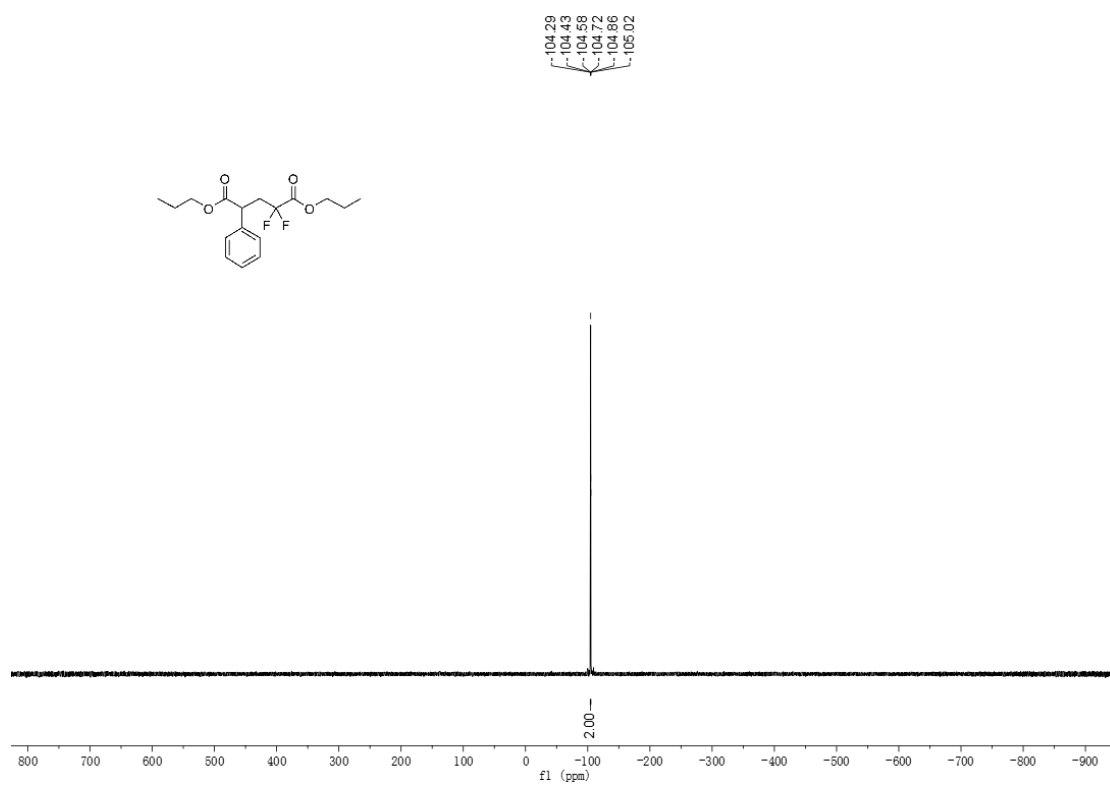

### <sup>1</sup>H NMR (700 MHz, CDCl<sub>3</sub>) 3ad

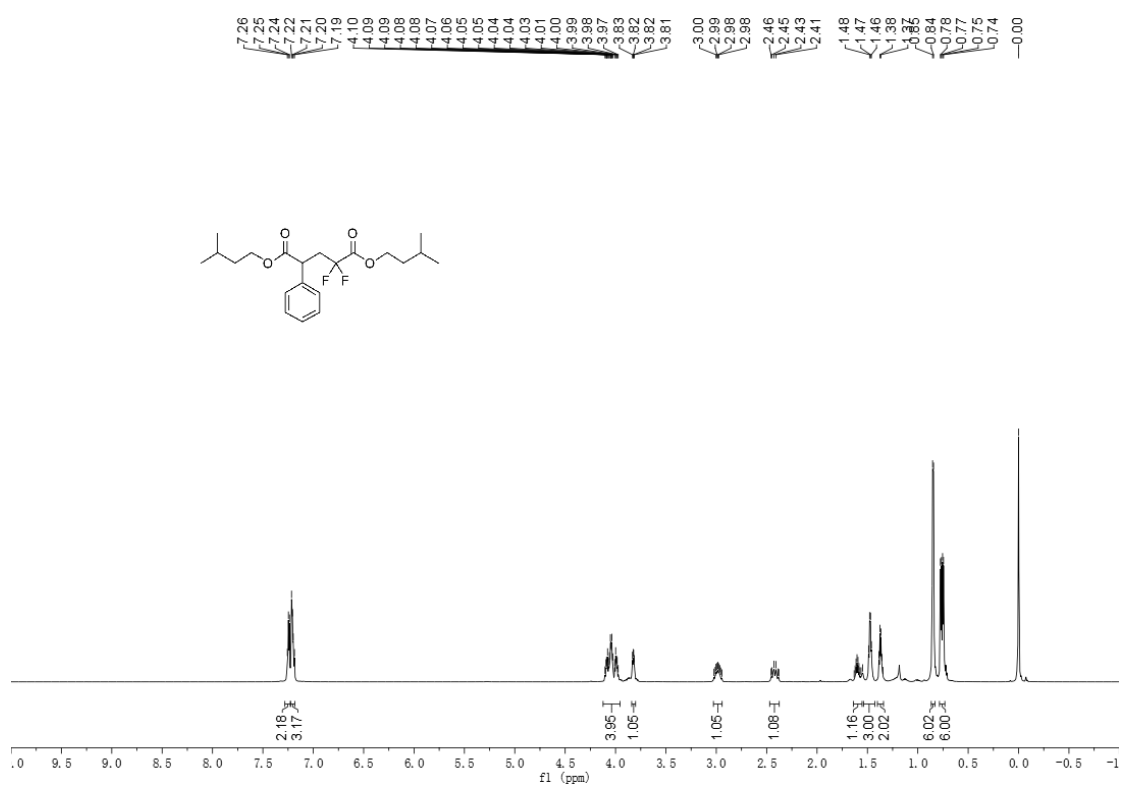

### <sup>13</sup>C NMR (176 MHz, CDCl<sub>3</sub>) 3ad

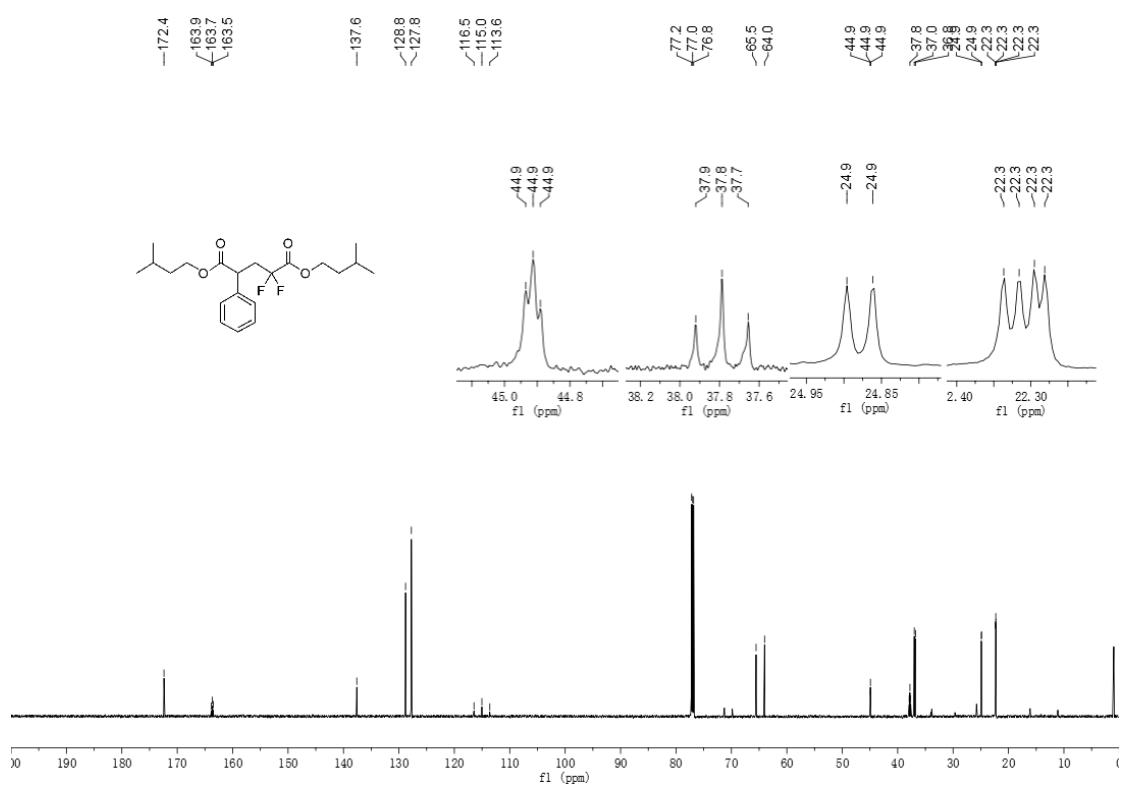

**<sup>19</sup>F NMR (56 MHz, CDCl<sub>3</sub>) 3ad**

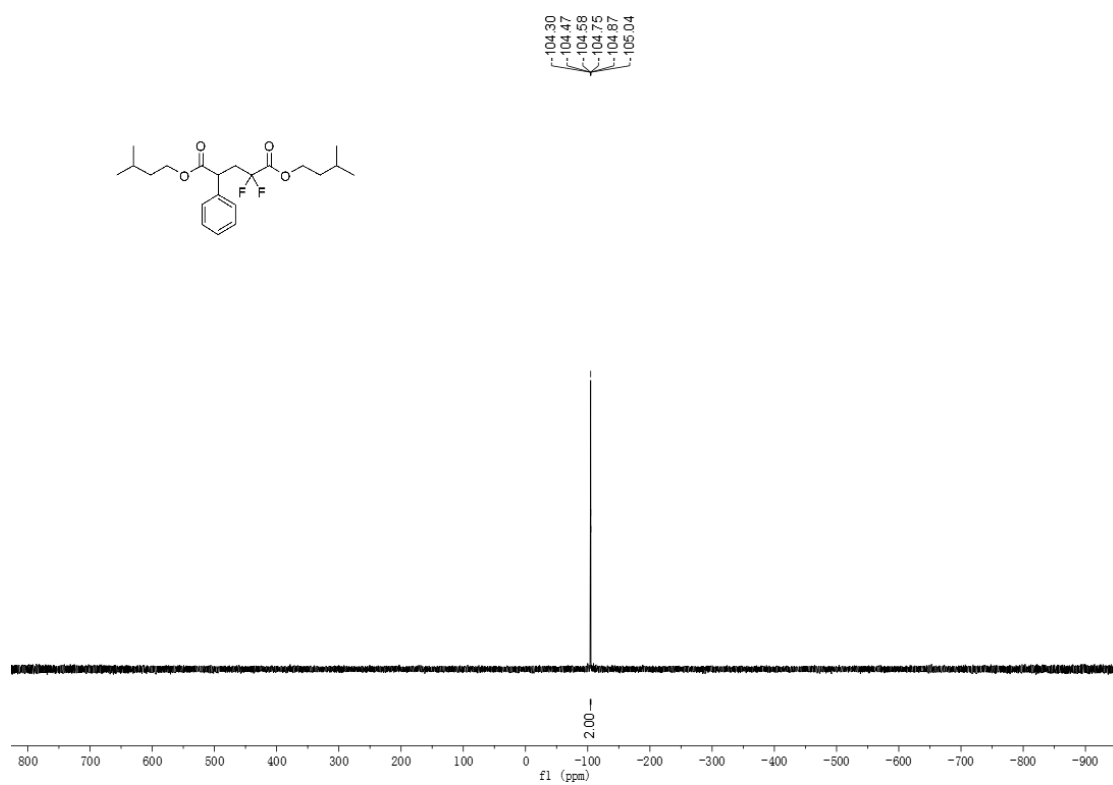



**<sup>1</sup>H NMR (700 MHz, CDCl<sub>3</sub>) 3ae**

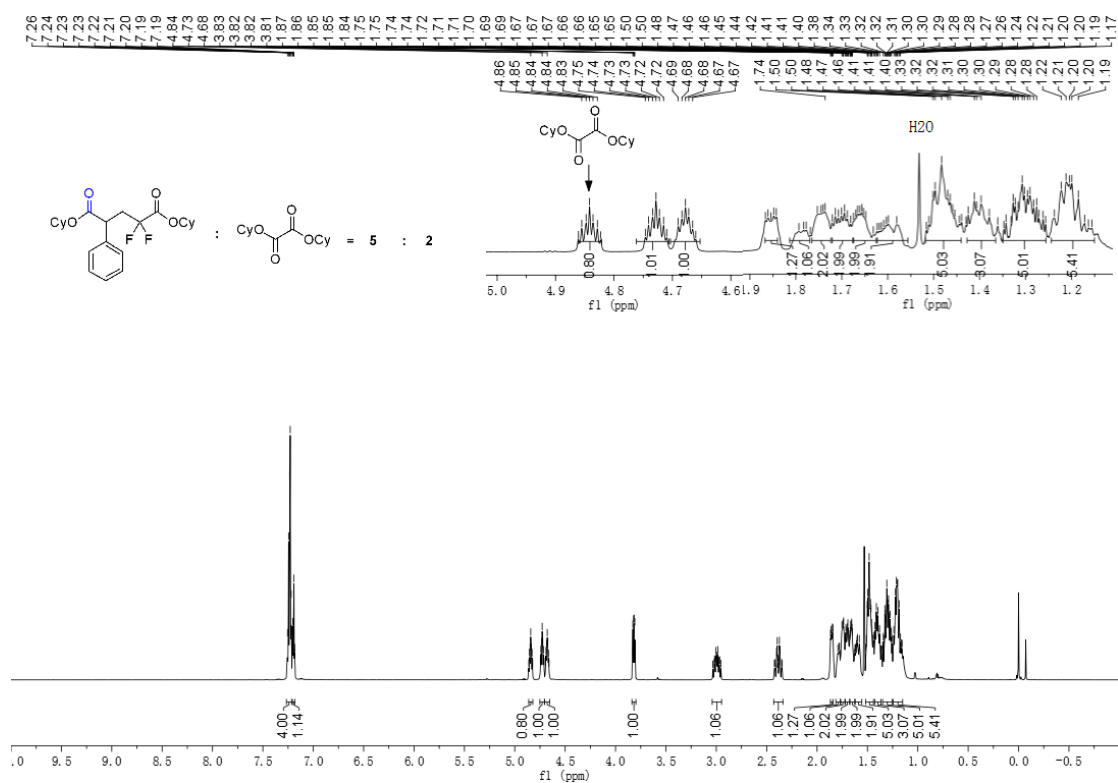

**<sup>13</sup>C NMR (176 MHz, CDCl<sub>3</sub>) 3ae**

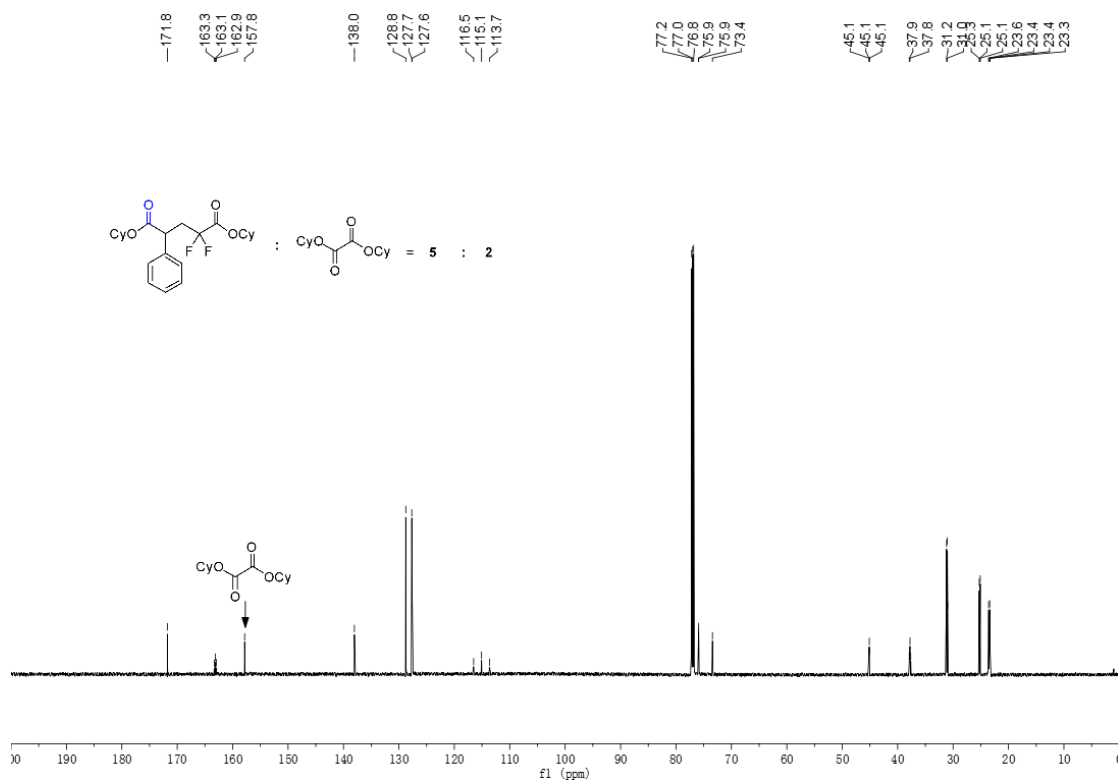

**<sup>19</sup>F NMR (56 MHz, CDCl<sub>3</sub>) 3ae**

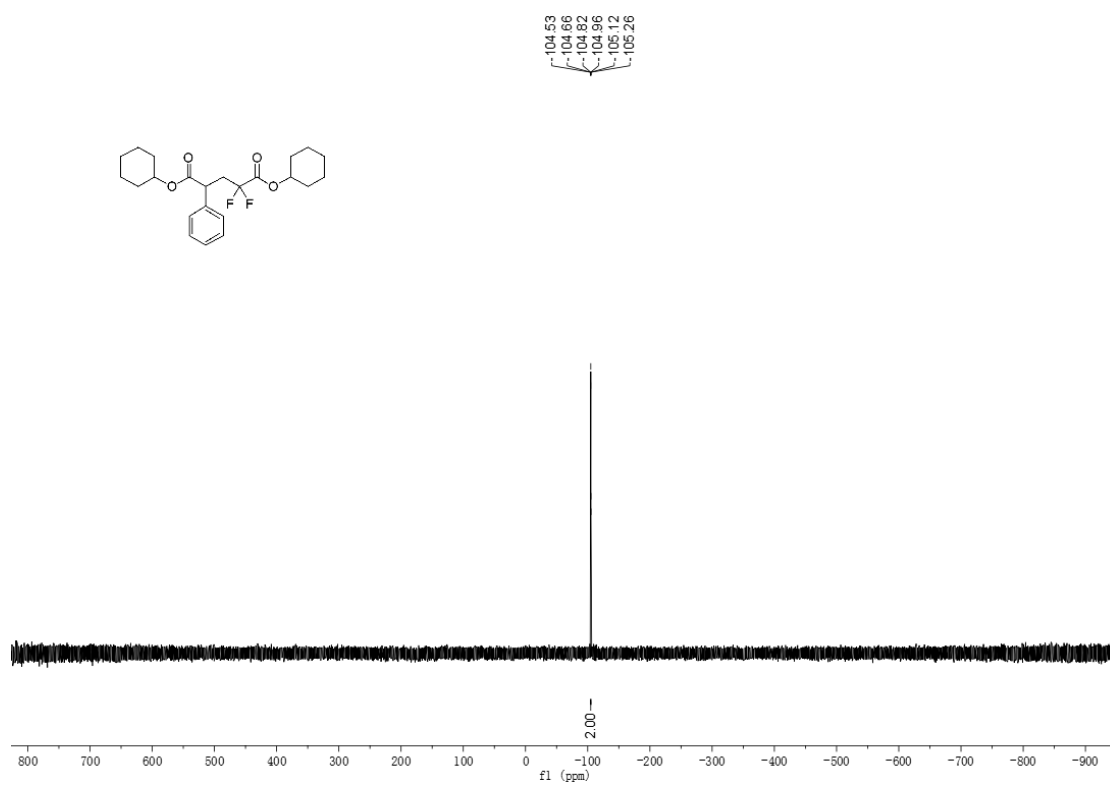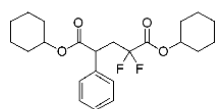

**<sup>1</sup>H NMR (700 MHz, CDCl<sub>3</sub>) 3af**

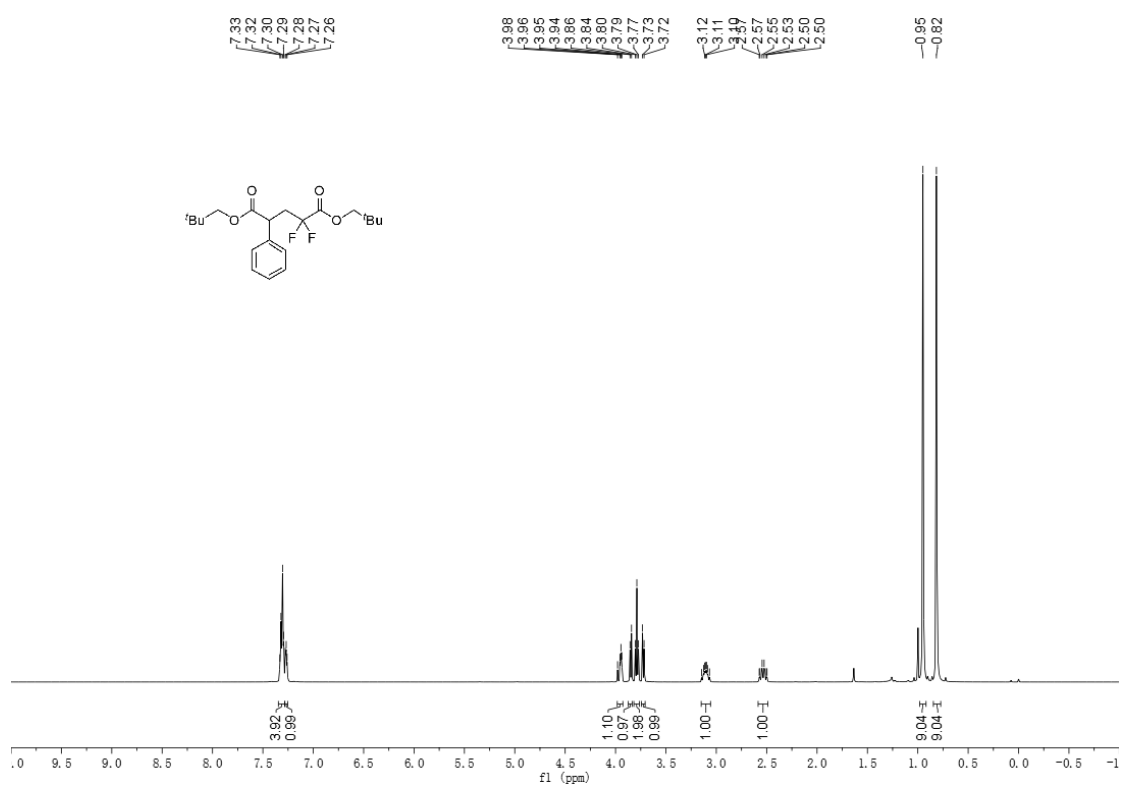

**<sup>13</sup>C NMR (176 MHz, CDCl<sub>3</sub>) 3af**

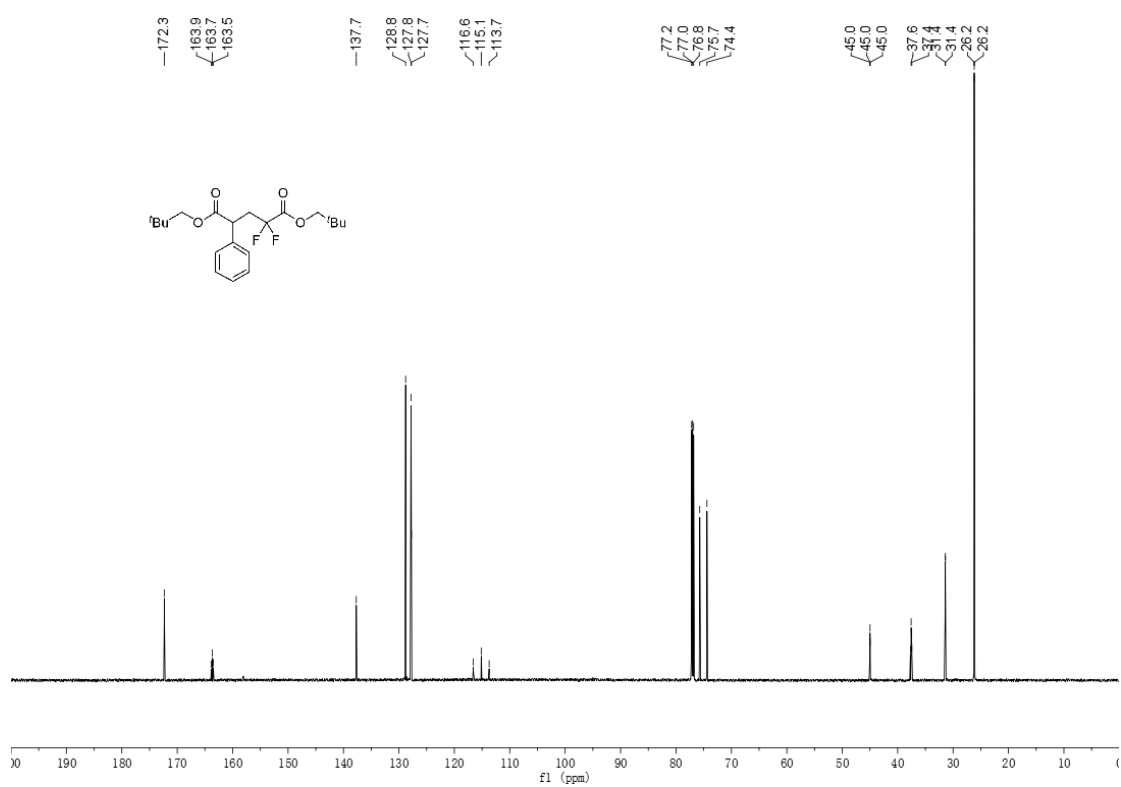

**<sup>19</sup>F NMR (56 MHz, CDCl<sub>3</sub>) 3af**

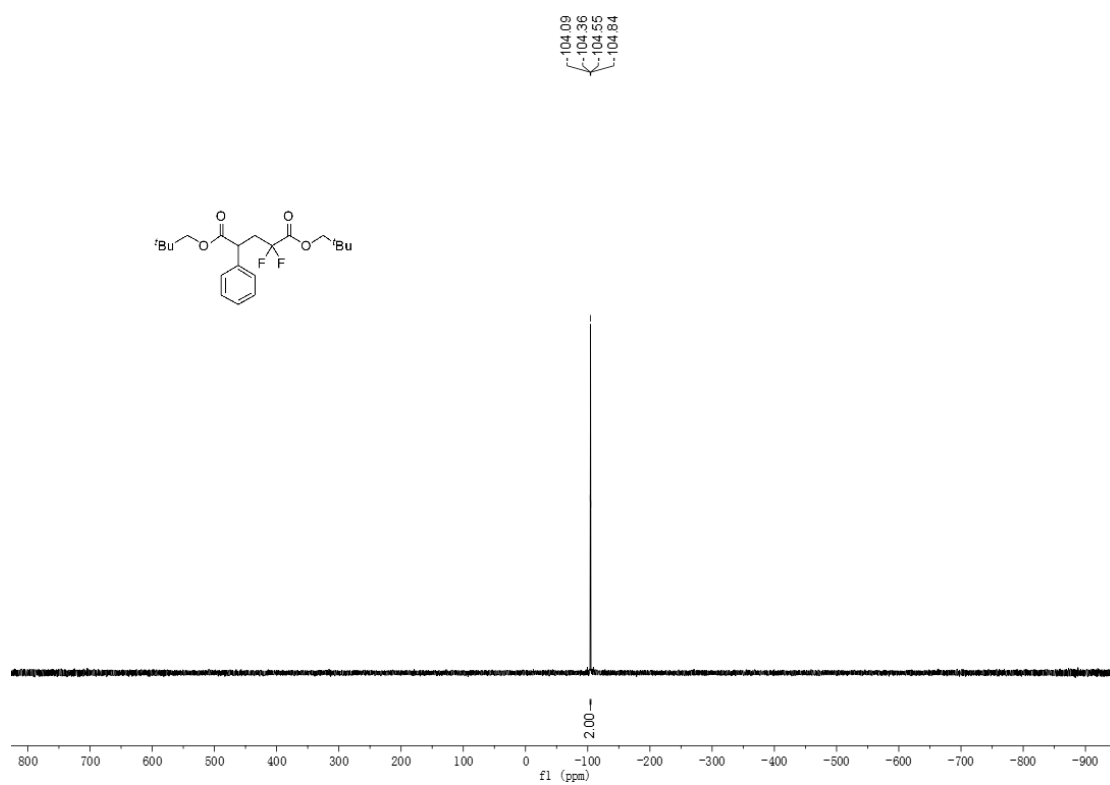

**<sup>1</sup>H NMR (700 MHz, CDCl<sub>3</sub>) 3ag**

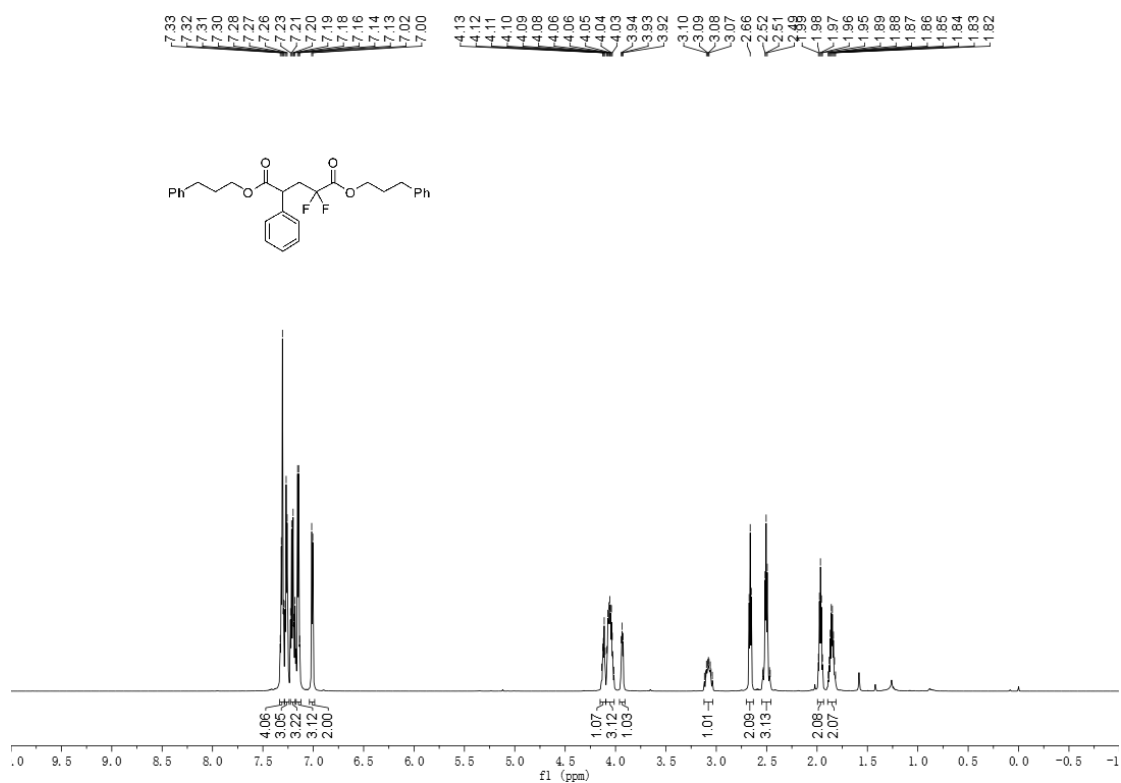

**<sup>13</sup>C NMR (176 MHz, CDCl<sub>3</sub>) 3ag**

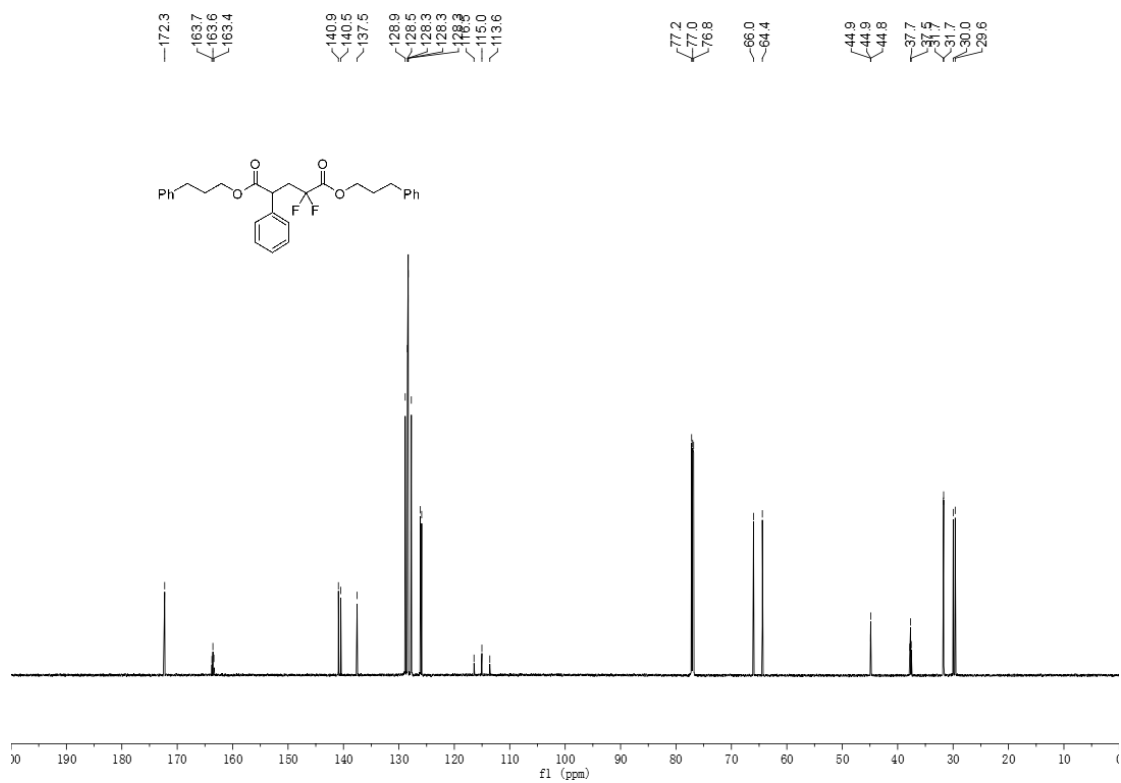

**<sup>19</sup>F NMR (56 MHz, CDCl<sub>3</sub>) 3ag**

104.06  
104.21  
104.26  
104.55  
104.60  
104.64  
104.79

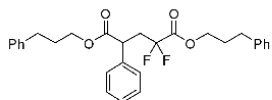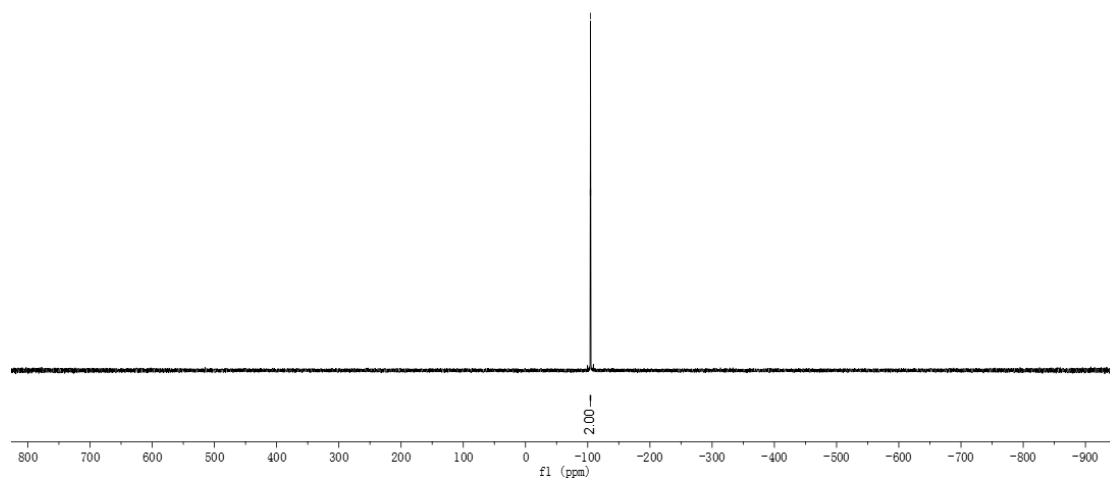

-12.62

7.36  
7.34  
7.32  
7.30  
7.28  
7.26

3.80  
3.79  
3.78  
3.77  
3.05  
3.03  
3.01  
2.99  
2.97  
2.95  
2.93  
2.90  
2.48  
2.45  
2.42  
2.37  
2.33  
2.32

$^1\text{H}$  NMR 400 MHz, DMSO

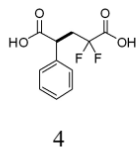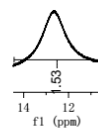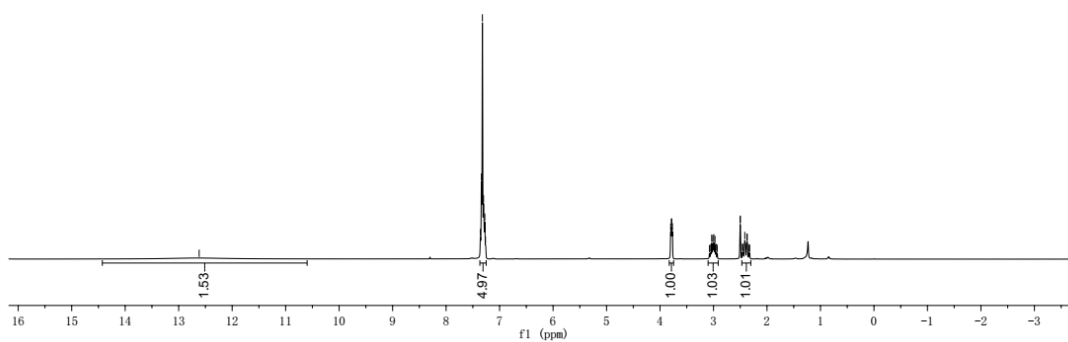

-173.4

165.1  
164.8  
164.5

-136.6

128.7  
127.7  
127.5

-118.1

-115.6  
-113.1

44.5

39.5

37.0

36.8

$^{13}\text{C}$  NMR 101 MHz, DMSO

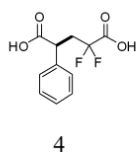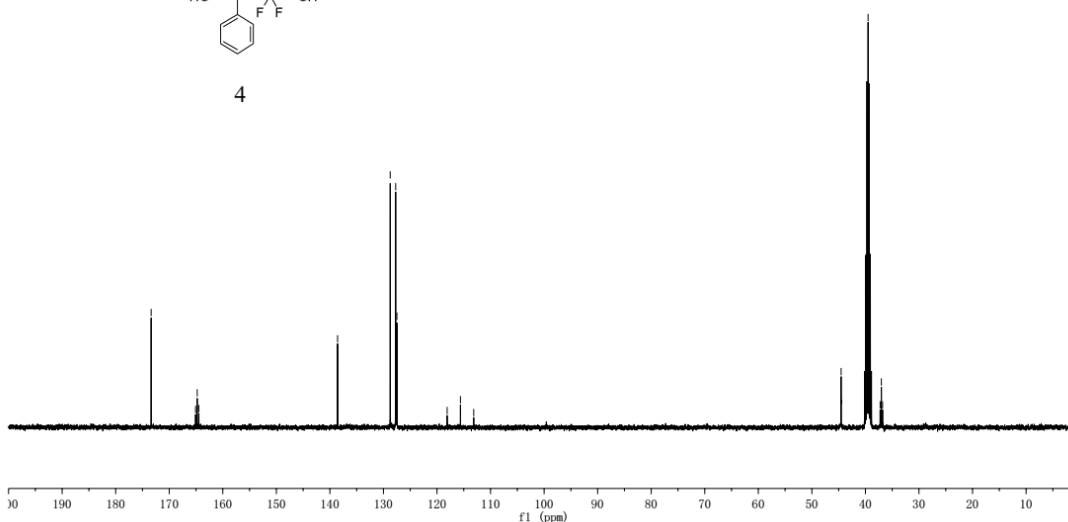

$^{19}\text{F}$  NMR 56 MHz, DMSO

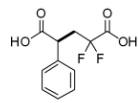

4

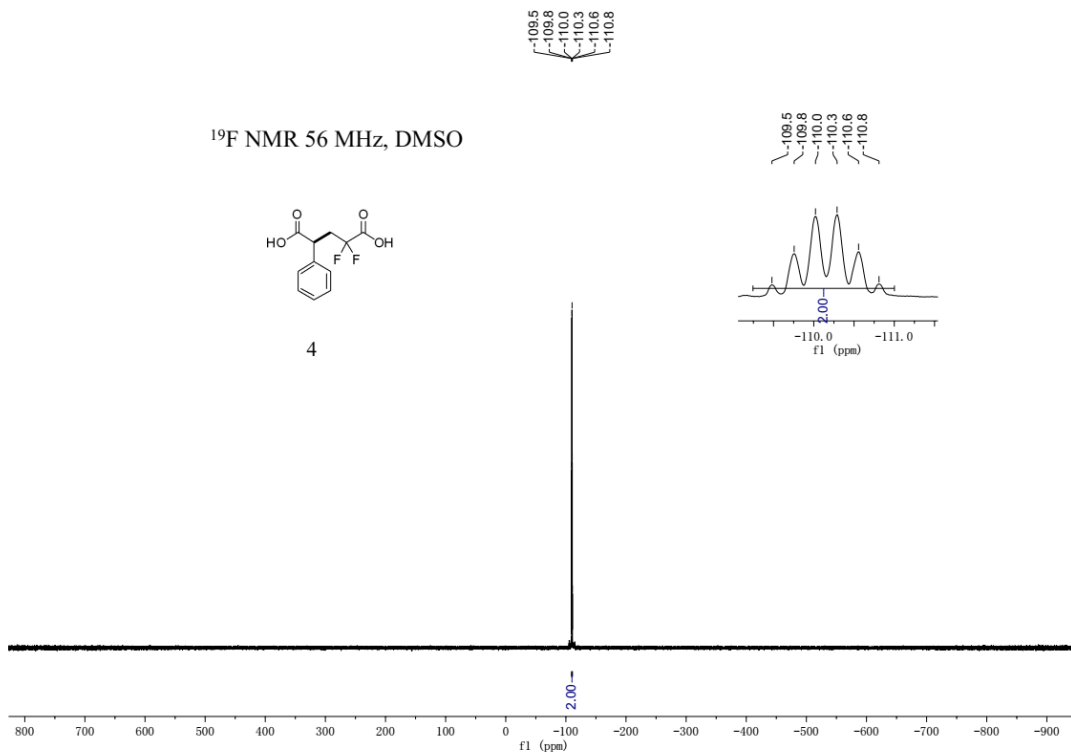



7.31  
7.30  
7.29  
7.23  
7.22  
7.21  
7.19  
7.18

3.67  
3.66  
3.59  
3.57  
3.56  
3.54  
3.50  
3.46  
3.45  
3.09  
3.07  
3.04  
2.43  
2.41  
2.40  
2.39  
2.38  
2.36  
2.26  
2.24  
2.23  
2.22  
2.21  
2.20  
2.18

$^1\text{H NMR}$  700 MHz,  $\text{CDCl}_3$

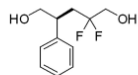

5

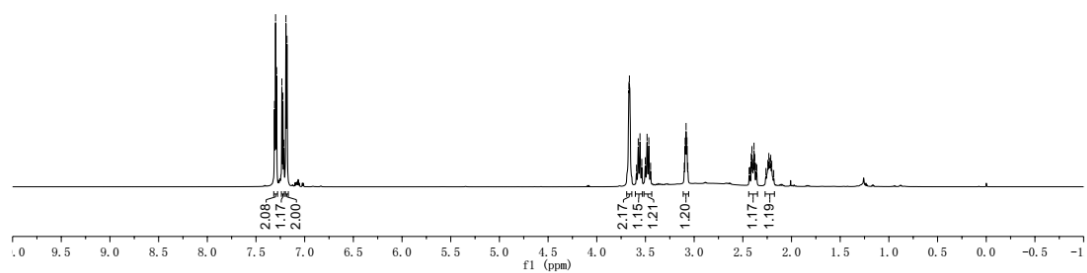

141.6  
128.7  
127.7  
127.0  
124.5  
123.1  
121.7

77.2  
77.0  
76.8  
66.9  
64.0  
63.8  
63.6

42.0  
35.4  
35.3  
35.1

$^{13}\text{C NMR}$  176 MHz,  $\text{CDCl}_3$

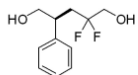

5

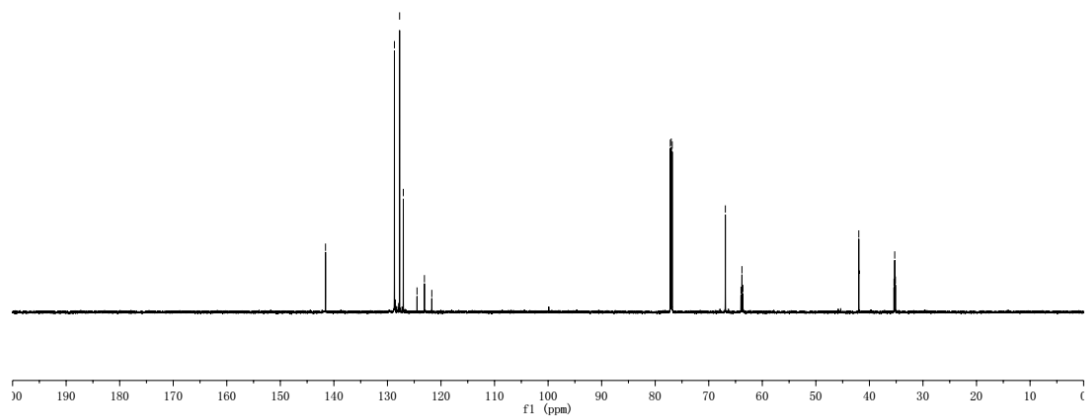

$^{19}\text{F}$  NMR 56 MHz,  $\text{CDCl}_3$

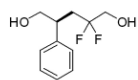

5

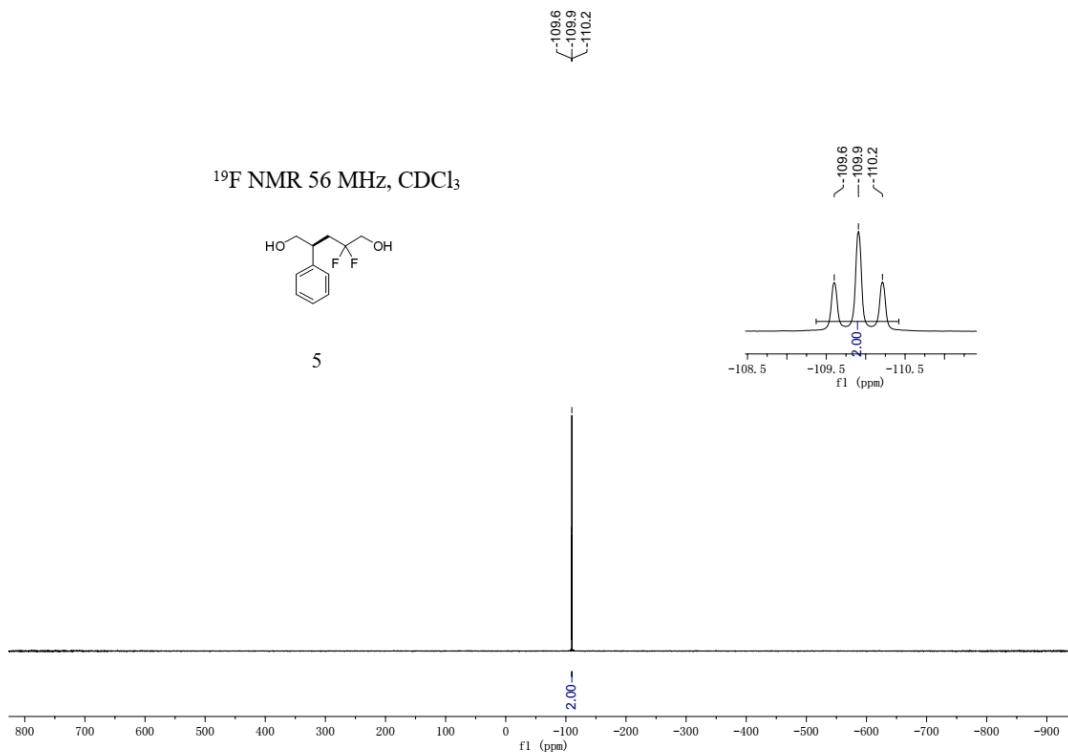

**<sup>1</sup>H NMR (700 MHz, CDCl<sub>3</sub>) 8**

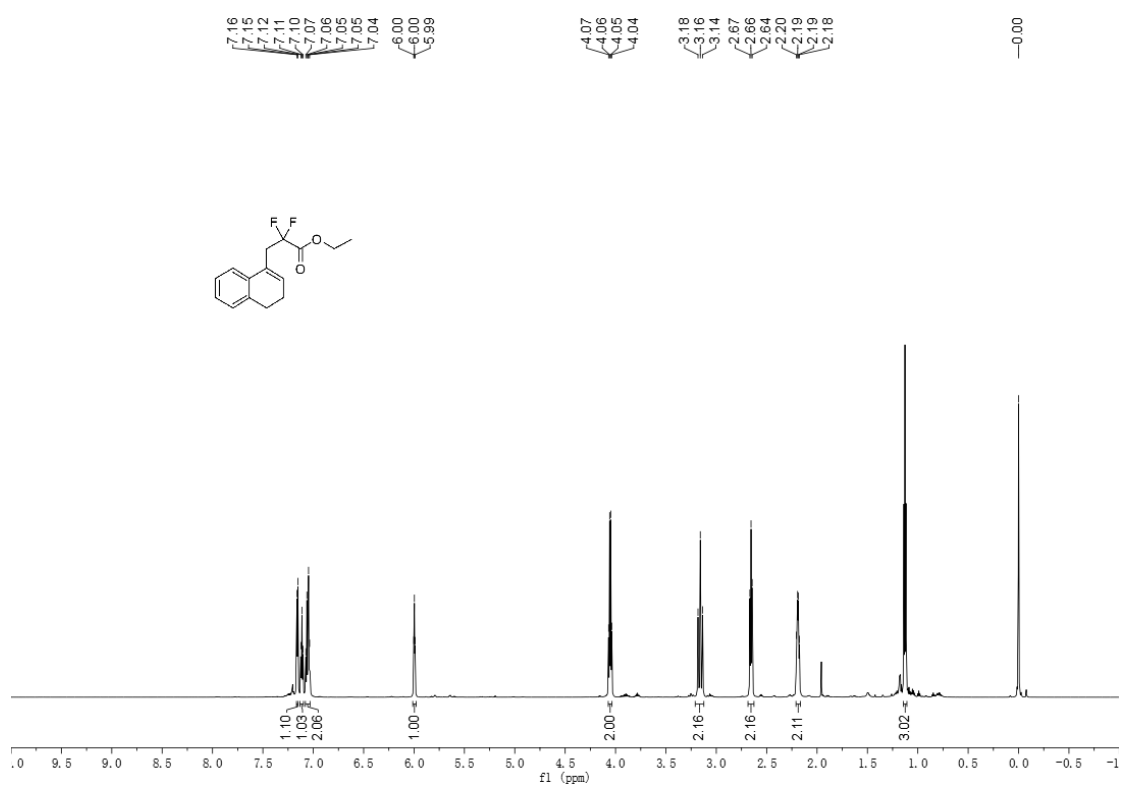

**<sup>13</sup>C NMR (176 MHz, CDCl<sub>3</sub>) 8**

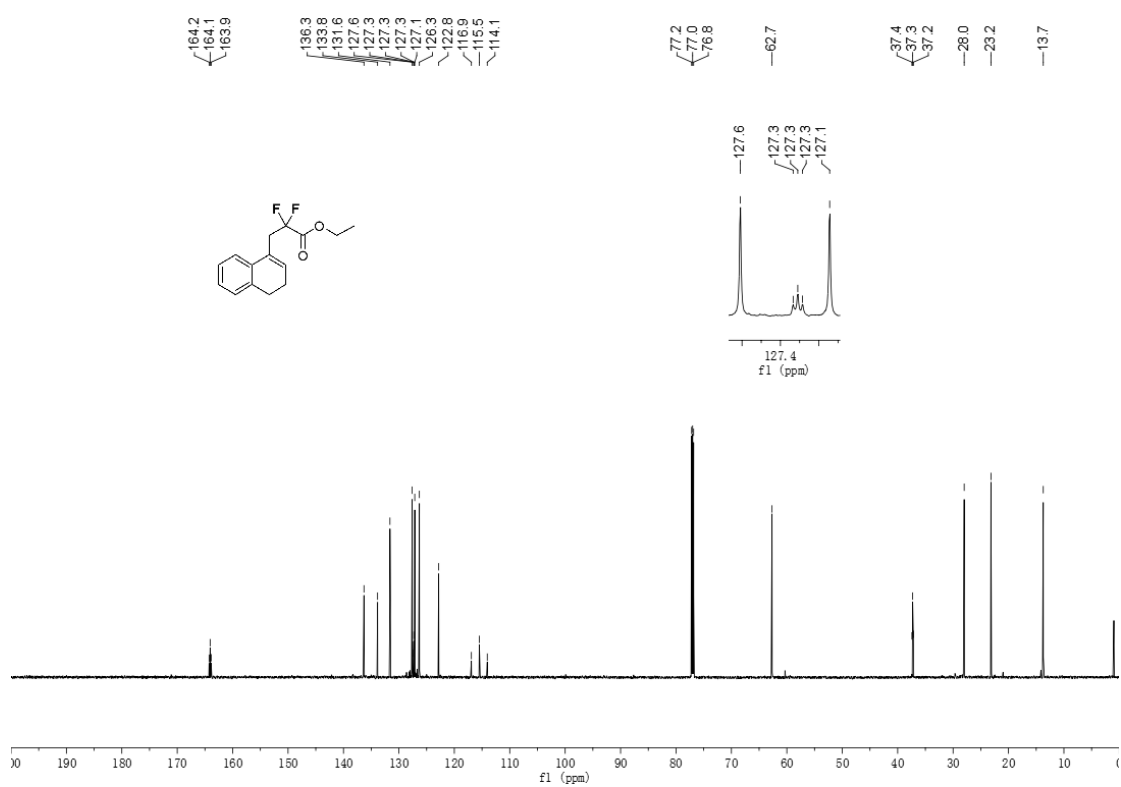

**<sup>19</sup>F NMR (56 MHz, CDCl<sub>3</sub>) 8**

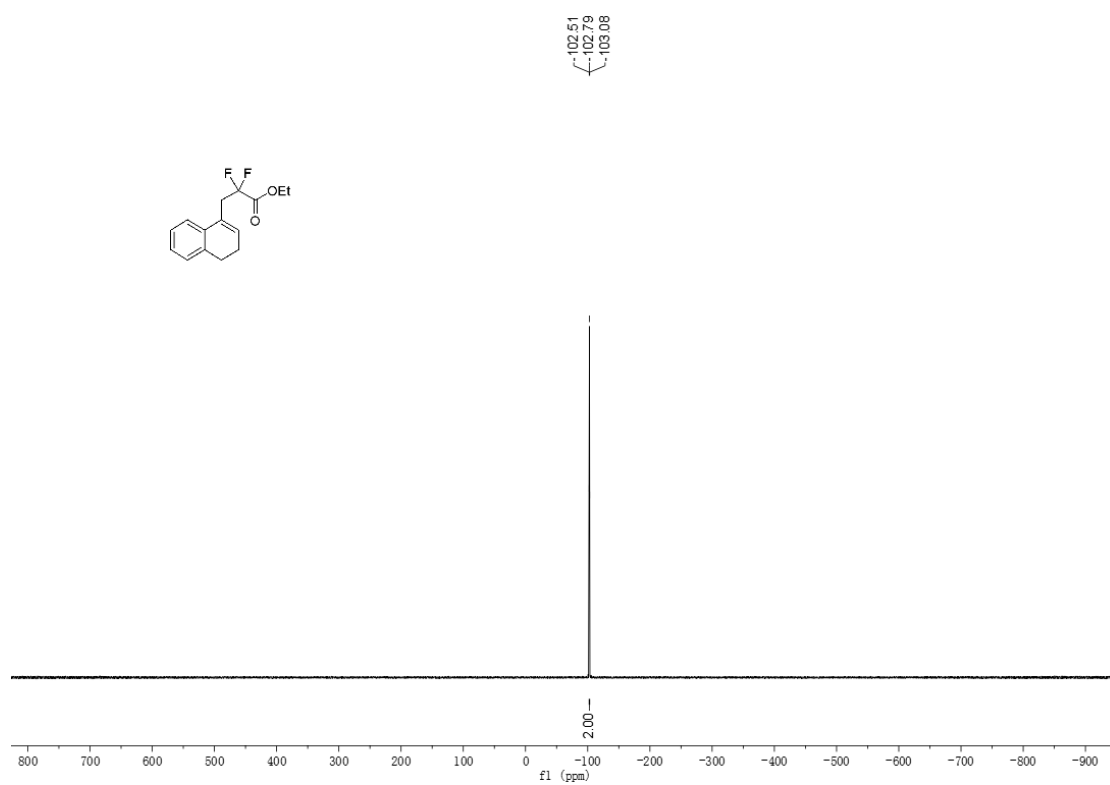

Supplement: d2sc02665a1.pdf [file d2sc02665a1.pdf]
